# Supplementary material
Source: HighWire-hosted journal article supplement (https://bmjopen.bmj.com/content/15/5/e096995)
Supplement: inline-supplementary-material-1 [file inline-supplementary-material-1.xlsx]

## Sheet: S.Table1
Supplementary Table 1. Search strategy to find eligible trials.
Database	Search strategy
PubMed	((((((((((Randomized Controlled Trial*[Title/Abstract]) OR (Randomized Trial*[Title/Abstract])) OR (Randomized[Title/Abstract])) OR (Randomised[Title/Abstract])) OR (Randomised Trial*[Title/Abstract])) OR (Control*[Title/Abstract])) OR (Blinded*[Title/Abstract])) OR (Placebo*[Title/Abstract])) AND (((((((((((((((((Drug Therapy[MeSH Terms]) OR (Drug*[Title/Abstract])) OR (Prescrib*[Title/Abstract]…
Embase	"Randomized Controlled Trial*".ab,ti. "Randomized Trial*".ab,ti. Randomized.ab,ti. Randomised.ab,ti. "Randomised Trial*".ab,ti. "Control*".ab,ti. "Blinded*".ab,ti. "Placebo*".ab,ti. 1 or 2 or 3 or 4 or 5 or 6 or 7 or 8 "Drug*".ab,ti. "Prescrib*".ab,ti. "Medicat*".ab,ti. "Pharmac*".ab,ti. "Drug* Therap*".ab,ti. "Medica* Management*".ab,ti. "Medica* Treatment*".ab,ti. "Pharmac* Intervention*".ab,ti…
CINAHL Complete	S1: AB = (Randomized Controlled Trial* OR Randomized Trial* OR Randomized OR Randomised OR Randomised Trial* OR Control* OR Blinded* OR Placebo*) OR TI = (Randomized Controlled Trial* OR Randomized Trial* OR Randomized OR Randomised OR Randomised Trial* OR Control* OR Blinded* OR Placebo*) S2: AB = (Drug Therapy OR Drug* OR Prescrib* OR Medicat* OR Pharmac* OR Drug* Therap* OR Medica* Management*…
WOS	#1 AB = (Randomized Controlled Trial* OR Randomized Trial* OR Randomized OR Randomised OR Randomised Trial* OR Control* OR Blinded* OR Placebo*) OR TI = (Randomized Controlled Trial* OR Randomized Trial* OR Randomized OR Randomised OR Randomised Trial* OR Control* OR Blinded* OR Placebo*) #2 AB = (Drug Therapy OR Drug* OR Prescrib* OR Medicat* OR Pharmac* OR Drug* Therap* OR Medica* Management* O…
WOS: Web of Science; CINAHL: Cumulative Index to Nursing and Allied Health Literature

## Sheet: S.Table3
Supplementary Table 3. The detailed risk of bias assessment for each randomized controlled trial.
	Randomisation process			Deviations from intended interventions							Missing outcome data				Measurement of the outcome					Selection of the reported result
Unique ID	1.1	1.2	1.3	2.1	2.2	2.3	2.4	2.5	2.6	2.7	3.1	3.2	3.3	3.4	4.1	4.2	4.3	4.4	4.5	5.1	5.2	5.3	Overall Judgement
1993 Hartigh J	NI	PY	N	PN	PN	NA	NA	NA	Y	NA	Y	NA	NA	NA	N	N	N	NA	NA	NI	N	N	Some concerns
1993 Sullivan M	NI	Y	N	N	N	NA	NA	NA	PN	PY	N	PN	PY	PY	N	N	N	NA	NA	NI	N	N	High
1998 Rosenberg S	Y	Y	N	N	N	NA	NA	NA	N	PN	N	PY	NA	NA	N	N	PN	NA	NA	NI	N	N	Some concerns
1999 Simpson J	NI	PY	NI	N	N	NA	NA	NA	N	PN	Y	NA	NA	NA	N	N	N	NA	NA	NI	N	N	Some concerns
2001 Bayar N	NI	Y	PN	N	Y	PN	NA	NA	NI	PN	Y	NA	NA	NA	N	N	PN	NA	NA	NI	N	N	Some concerns
2001 Drew S	Y	Y	N	N	N	NA	NA	NA	Y	NA	PY	NA	NA	NA	PN	N	N	NA	NA	NI	N	PN	Low
2002 Morgenstern C	Y	PY	NI	PN	PN	NA	NA	NA	Y	NA	Y	NA	NA	NA	PN	N	N	NA	NA	NI	N	N	Some concerns
2003 Arda H	NI	NI	N	NI	NI	PY	PY	PN	N	PN	Y	NA	NA	NA	N	N	NI	PY	PY	NI	N	N	High
2005 Robinson	Y	Y	N	N	N	NA	NA	NA	Y	NA	Y	NA	NA	NA	N	N	N	NA	NA	PN	N	N	Low
2006 Zoger S	Y	Y	N	N	N	NA	NA	NA	Y	NA	N	Y	NA	NA	N	N	N	NA	NA	NI	N	N	Some concerns
2007 Dib G	NI	Y	N	N	N	NA	NA	NA	Y	NA	Y	NA	NA	NA	N	N	N	NA	NA	Y	N	N	Low
2007 Piccirillo J	Y	Y	N	N	N	NA	NA	NA	Y	NA	N	Y	NA	NA	N	N	PN	NA	NA	NI	N	N	Some concerns
2007 Witsell D	Y	Y	N	N	N	NA	NA	NA	N	PN	N	PY	NA	NA	N	N	PN	NA	NA	NI	N	N	High
2009 Azevedo A	NI	Y	N	N	N	NA	NA	NA	N	PY	N	PN	PY	PY	N	N	PN	NA	NA	NI	N	N	High
2009 Jalali M	Y	Y	N	PN	PN	NA	NA	NA	N	PN	Y	NA	NA	NA	N	N	PN	NA	NA	NI	N	N	Some concerns
2009 Mazurek B	NI	PY	N	PN	PN	NA	NA	NA	Y	NA	Y	NA	NA	NA	N	N	N	NA	NA	NI	N	N	Some concerns
2011 Holgers K	Y	Y	N	N	N	NA	NA	NA	Y	NA	Y	NA	NA	NA	N	N	N	NA	NA	Y	N	N	Low
2011 Meeus O	NI	PY	N	PN	PN	NA	NA	NA	PN	PN	N	PY	NA	NA	N	N	PN	NA	NA	NI	N	N	Some concerns
2011 Roberts C	NI	PY	Y	PN	PN	NA	NA	NA	PY	NA	Y	NA	NA	NA	N	N	PN	NA	NA	NI	N	N	Some concerns
2011 Shim H	NI	PY	N	PN	PN	NA	NA	NA	PY	NA	Y	NA	NA	NA	PN	N	PN	NA	NA	NI	N	N	Some concerns
2011 Suckfull M	Y	Y	N	N	N	NA	NA	NA	Y	NA	Y	NA	NA	NA	N	N	PN	NA	NA	Y	N	N	Low
2011 Sziklai I	Y	Y	NI	N	N	NA	NA	NA	NI	PY	N	N	Y	Y	N	N	PN	NA	NA	NI	N	N	High
2012 Aoki M	PY	Y	N	PN	PN	NA	NA	NA	N	PN	Y	NA	NA	NA	N	N	PN	NA	NA	NI	N	N	Some concerns
2012 Gerami H	NI	PY	NI	PN	PN	NA	NA	NA	N	PN	Y	NA	NA	NA	N	PN	PN	NA	NA	NI	N	N	Some concerns
2012 Han S	Y	PY	N	N	Y	PN	NA	NA	N	PN	N	PY	NA	NA	N	N	PN	NA	NA	NI	N	N	Some concerns
2012 Koybasi S	NI	PY	N	PN	PN	NA	NA	NA	PY	NA	N	PY	NA	NA	N	N	PN	NA	NA	NI	N	N	Some concerns
2012 Sharma D	NI	PY	Y	PN	PN	NA	NA	NA	N	PN	Y	NA	NA	NA	N	N	PN	NA	NA	NI	N	N	Some concerns
2013 Coelho C	Y	Y	N	N	N	NA	NA	NA	Y	NA	Y	NA	NA	NA	N	N	N	NA	NA	Y	N	N	Low
2013 Ino T	Y	Y	N	PN	PN	NA	NA	NA	Y	NA	Y	NA	NA	NA	N	N	PN	NA	NA	Y	N	N	Low
2013 Taslimi S	Y	Y	N	N	N	NA	NA	NA	Y	NA	Y	NA	NA	NA	N	N	PN	NA	NA	NI	N	N	Some concerns
2014 Albu S	Y	Y	N	N	N	NA	NA	NA	PY	NA	Y	NA	NA	NA	N	PN	PN	NA	NA	NI	N	N	Some concerns
2014 Ciodaro F	Y	Y	N	PN	PN	NA	NA	NA	NI	Y	NI	PY	NA	NA	N	N	PN	NA	NA	NI	N	N	High
2014 Mahendru B	NI	NI	NI	NI	NI	PY	PY	PY	PN	PY	NI	PN	PY	PY	N	N	NI	PY	PY	NI	PN	PN	High
2015 Aoki M	Y	Y	N	PN	PN	NA	NA	NA	N	PN	Y	NA	NA	NA	N	N	PN	NA	NA	Y	N	N	Some concerns
2016 Elzayat S	Y	Y	N	N	N	NA	NA	NA	Y	NA	Y	NA	NA	NA	N	N	N	NA	NA	Y	N	N	Low
2016 Lim H	Y	Y	N	N	N	NA	NA	NA	N	PN	N	PY	NA	NA	N	N	N	NA	NA	NI	N	N	Some concerns
2016 Maeda T	Y	PY	N	PN	PN	NA	NA	NA	N	PN	Y	NA	NA	NA	N	N	PN	NA	NA	NI	N	N	Some concerns
2016 Polanski J	Y	PY	NI	PN	PN	NA	NA	NA	NI	NI	NI	PN	PY	PY	N	N	PN	NA	NA	N	N	N	High
2017 Abtahi S	NI	PY	N	N	PN	NA	NA	NA	N	PN	Y	NA	NA	NA	N	N	PN	NA	NA	NI	N	N	Some concerns
2017 Azevedo A	Y	PY	NI	PN	Y	PN	NA	NA	Y	NA	Y	NA	NA	NA	N	N	N	NA	NA	NI	N	N	Some concerns
2017 Lee H	Y	Y	N	N	N	NA	NA	NA	Y	NA	Y	NA	NA	NA	N	N	N	NA	NA	NI	N	N	Some concerns
2018 Beaino M	Y	Y	N	N	N	NA	NA	NA	N	PN	Y	NA	NA	NA	N	N	PN	NA	NA	Y	N	N	Some concerns
2018 Elzayat S	Y	Y	N	N	N	NA	NA	NA	N	PN	Y	NA	NA	NA	N	N	PN	NA	NA	Y	N	N	Some concerns
2018 Ohkuma A	Y	Y	N	N	Y	PN	NA	NA	Y	NA	Y	NA	NA	NA	N	N	N	NA	NA	Y	N	N	Low
2018 Prochazkova K	Y	Y	N	N	N	NA	NA	NA	Y	NA	Y	NA	NA	NA	N	N	N	NA	NA	Y	N	N	Low
2018 Sharma A	Y	PY	N	NI	PY	PY	PY	PY	PN	PN	Y	NA	NA	NA	N	N	PN	NA	NA	NI	N	N	Some concerns
2019 Ezz T	NI	PN	N	PY	PY	PY	PY	PY	PY	NA	PY	NA	NA	NA	N	N	PY	PY	PY	NI	N	N	High
2019 Nishad R	Y	NI	NI	NI	NI	Y	Y	Y	NI	PN	PY	NA	NA	NA	PN	N	NI	PY	PY	NI	N	N	High
2019 Petridou A	Y	Y	N	N	N	NA	NA	NA	Y	NA	Y	NA	NA	NA	N	N	PN	NA	NA	Y	N	N	Low
2020 Farhadi M	Y	Y	N	N	N	NA	NA	NA	Y	PN	Y	NA	NA	NA	N	N	N	NA	NA	Y	N	N	Low
2020 Yener H	Y	NI	N	NI	NI	PY	Y	PY	PY	NA	PY	NA	NA	NA	N	N	NI	PY	PY	NI	N	N	High
2021 Kucher K	NI	PY	N	PN	PN	NA	NA	NA	N	PN	Y	NA	NA	NA	N	N	N	NA	NA	Y	N	N	Some concerns
2021 Ledesma A	Y	Y	N	N	N	NA	NA	NA	Y	NA	Y	NA	NA	NA	N	N	N	NA	NA	Y	N	N	Low
2021 Saberi A	Y	Y	N	N	N	NA	NA	NA	N	PN	Y	NA	NA	NA	N	N	N	NA	NA	Y	N	N	Some concerns
2023 Castilho L	Y	Y	N	N	N	NA	NA	NA	Y	NA	Y	NA	NA	NA	N	N	N	NA	NA	NI	N	N	Some concerns
2023 Chauhan B	NI	NI	N	NI	NI	PY	PY	PY	N	NI	Y	NA	NA	NA	N	N	Y	Y	Y	Y	N	N	High
2023 Khosravi H	Y	Y	N	N	N	NA	NA	NA	N	PN	N	Y	NA	NA	N	N	N	NA	NA	Y	N	N	Some concerns
2024 Abouzari M	NI	Y	N	N	N	NA	NA	NA	Y	NA	Y	NA	NA	NA	N	N	N	NA	NA	Y	N	N	Low
2024 Dadgarnia M	Y	Y	N	N	N	NA	NA	NA	NI	NI	NI	PY	NA	NA	N	N	N	NA	NA	NI	N	N	High
2025 Abbasi R	Y	Y	N	N	N	NA	NA	NA	Y	NA	Y	NA	NA	NA	N	N	N	NA	NA	NI	N	N	Some concerns
NA: not availablel; NI: no information; PY: probably yes; PN: probably no; N: no; Y: yes;
Randomisation process 1.1 Was the allocation sequence random? 1.2 Was the allocation sequence concealed until participants were enrolled and assigned to interventions? 1.3 Did baseline differences between intervention groups suggest a problem with the randomization process?
Deviations from intended interventions 2.1 Were participants aware of their assigned intervention during the trial? 2.2 Were carers and people delivering the interventions aware of participants' assigned intervention during the trial? 2.3 If Y/PY/NI to 2.1 or 2.2: Were there deviations from the intended intervention that arose because of the experimental context? 2.4 If Y/PY to 2.3: Were these de…
Missing outcome data 3.1 Were data for this outcome available for all, or nearly all, participants randomized? 3.2 If N/PN/NI to 3.1: Is there evidence that the result was not biased by missing outcome data? 3.3 If N/PN to 3.2: Could missingness in the outcome depend on its true value? 3.4 If Y/PY/NI to 3.3: Is it likely that missingness in the outcome depended on its true value?
Measurement of the outcome 4.1 Was the method of measuring the outcome inappropriate? 4.2 Could measurement or ascertainment of the outcome have differed between intervention groups? 4.3 If N/PN/NI to 4.1 and 4.2: Were outcome assessors aware of the intervention received by study participants? 4.4 If Y/PY/NI to 4.3: Could assessment of the outcome have been influenced by knowledge of intervention…
Selection of the reported result 5.1 Were the data that produced this result analysed in accordance with a pre-specified analysis plan that was finalized before unblinded outcome data were available for analysis? 5.2 ... multiple eligible outcome measurements (e.g. scales, definitions, time points) within the outcome domain? 5.3 ... multiple eligible analyses of the data?

## Sheet: S.Table4
Supplementary Table 4. League table for severity network meta-analysis.
reference	compare	network results	pairwise results
GB-Vit	caroverine	-1.15 (-2.84; 0.54)	.
GB-Vit	amitriptyline	-2.17 (-3.63; -0.71)	.
GB-Vit	lidocaine	-2.12 (-3.74; -0.50)	.
GB-Vit	pentoxifylline	-2.18 (-3.45; -0.91)	.
GB-Vit	gabapentin-lidocaine	-2.24 (-3.60; -0.88)	.
GB-Vit	GB	-2.29 (-3.27; -1.31)	-1.99 (-2.99; -0.98)
GB-Vit	acamprosate	-2.30 (-3.88; -0.71)	.
GB-Vit	deanxit-clonazepam	-2.32 (-3.94; -0.70)	.
GB-Vit	lipoic acid + Vit	-2.44 (-3.63; -1.26)	.
GB-Vit	piribedil	-2.43 (-3.78; -1.08)	.
GB-Vit	Neurotec	-2.44 (-3.79; -1.08)	.
GB-Vit	pramipexole	-2.48 (-3.92; -1.04)	.
GB-Vit	clonazepam	-2.53 (-3.87; -1.20)	.
GB-Vit	nortriptyline	-2.61 (-3.97; -1.25)	.
GB-Vit	misprost	-2.64 (-3.98; -1.30)	.
GB-Vit	ALP-ITDI-LPE	-2.62 (-4.27; -0.98)	.
GB-Vit	oxcarbazepine	-2.66 (-4.13; -1.20)	.
GB-Vit	ITDI-melatonin	-2.71 (-4.30; -1.11)	.
GB-Vit	VER-PAR	-2.74 (-4.16; -1.33)	.
GB-Vit	sulodexide	-2.75 (-4.09; -1.41)	.
GB-Vit	alprazolam	-2.79 (-4.18; -1.40)	.
GB-Vit	NOR-TOP	-2.76 (-4.18; -1.34)	.
GB-Vit	zinc	-2.83 (-4.05; -1.60)	.
GB-Vit	carbamazepine	-2.82 (-4.28; -1.36)	.
GB-Vit	ITDI	-2.87 (-4.11; -1.64)	.
GB-Vit	melatonin	-2.88 (-4.17; -1.58)	.
GB-Vit	betahistine	-2.93 (-4.31; -1.54)	.
GB-Vit	neramexane	-2.93 (-4.25; -1.61)	.
GB-Vit	paroxetine	-2.97 (-4.32; -1.63)	.
GB-Vit	sertraline	-3.01 (-4.30; -1.73)	.
GB-Vit	gabapentin	-2.99 (-4.16; -1.82)	.
GB-Vit	CoQ10	-3.06 (-4.47; -1.65)	.
GB-Vit	ondansetron	-3.05 (-4.44; -1.66)	.
GB-Vit	VES-PAR	-3.11 (-4.52; -1.69)	.
GB-Vit	VitB12	-3.15 (-4.49; -1.82)	.
GB-Vit	vestipitant	-3.16 (-4.57; -1.74)	.
GB-Vit	placebo	-3.11 (-4.15; -2.06)	-3.64 (-4.78; -2.51)
GB-Vit	trazodone	-3.20 (-4.56; -1.84)	.
GB-Vit	hangekobokuto	-3.26 (-4.63; -1.89)	.
GB-Vit	EHLP	-3.23 (-4.46; -2.00)	.
GB-Vit	alprazolam-ITDI	-3.48 (-5.14; -1.83)	.
GB-Vit	oligonol	-3.44 (-4.94; -1.94)	.
GB-Vit	vardenafil	-3.46 (-4.89; -2.03)	.
GB-Vit	cilostazol	-4.02 (-5.46; -2.58)	.
caroverine	amitriptyline	-1.02 (-2.70; 0.66)	.
caroverine	lidocaine	-0.97 (-2.79; 0.85)	.
caroverine	pentoxifylline	-1.03 (-2.74; 0.68)	.
caroverine	gabapentin-lidocaine	-1.09 (-2.68; 0.50)	.
caroverine	GB	-1.14 (-2.65; 0.37)	.
caroverine	acamprosate	-1.15 (-2.93; 0.63)	.
caroverine	deanxit-clonazepam	-1.17 (-3.16; 0.81)	.
caroverine	lipoic acid + Vit	-1.30 (-2.78; 0.19)	.
caroverine	piribedil	-1.28 (-2.86; 0.29)	.
caroverine	Neurotec	-1.29 (-2.87; 0.30)	.
caroverine	pramipexole	-1.33 (-2.99; 0.33)	.
caroverine	clonazepam	-1.39 (-3.14; 0.37)	.
caroverine	nortriptyline	-1.46 (-3.05; 0.13)	.
caroverine	misprost	-1.49 (-3.06; 0.08)	.
caroverine	ALP-ITDI-LPE	-1.48 (-3.32; 0.37)	.
caroverine	oxcarbazepine	-1.51 (-3.19; 0.17)	.
caroverine	ITDI-melatonin	-1.56 (-3.35; 0.23)	.
caroverine	VER-PAR	-1.59 (-3.23; 0.04)	.
caroverine	sulodexide	-1.60 (-3.17; -0.03)	.
caroverine	alprazolam	-1.64 (-3.26; -0.03)	.
caroverine	NOR-TOP	-1.61 (-3.25; 0.03)	.
caroverine	zinc	-1.68 (-3.15; -0.20)	.
caroverine	carbamazepine	-1.67 (-3.35; 0.00)	.
caroverine	ITDI	-1.73 (-3.21; -0.24)	.
caroverine	melatonin	-1.73 (-3.26; -0.19)	.
caroverine	betahistine	-1.78 (-2.75; -0.81)	-1.78 (-2.75; -0.81)
caroverine	neramexane	-1.78 (-3.34; -0.23)	.
caroverine	paroxetine	-1.82 (-3.40; -0.25)	.
caroverine	sertraline	-1.86 (-3.39; -0.34)	.
caroverine	gabapentin	-1.84 (-3.27; -0.42)	.
caroverine	CoQ10	-1.91 (-3.54; -0.28)	.
caroverine	ondansetron	-1.90 (-3.52; -0.29)	.
caroverine	VES-PAR	-1.96 (-3.59; -0.32)	.
caroverine	VitB12	-2.00 (-3.57; -0.44)	.
caroverine	vestipitant	-2.01 (-3.65; -0.37)	.
caroverine	placebo	-1.96 (-3.29; -0.63)	.
caroverine	trazodone	-2.05 (-3.64; -0.46)	.
caroverine	hangekobokuto	-2.11 (-3.71; -0.52)	.
caroverine	EHLP	-2.08 (-3.56; -0.60)	.
caroverine	alprazolam-ITDI	-2.33 (-4.18; -0.49)	.
caroverine	oligonol	-2.29 (-4.00; -0.58)	.
caroverine	vardenafil	-2.31 (-3.96; -0.66)	.
caroverine	cilostazol	-2.87 (-4.53; -1.22)	.
amitriptyline	lidocaine	0.05 (-1.56; 1.66)	.
amitriptyline	pentoxifylline	-0.01 (-1.50; 1.47)	.
amitriptyline	gabapentin-lidocaine	-0.07 (-1.42; 1.27)	.
amitriptyline	GB	-0.12 (-1.36; 1.12)	.
amitriptyline	acamprosate	-0.13 (-1.70; 1.44)	.
amitriptyline	deanxit-clonazepam	-0.15 (-1.95; 1.64)	.
amitriptyline	lipoic acid + Vit	-0.28 (-1.50; 0.95)	.
amitriptyline	piribedil	-0.26 (-1.59; 1.07)	.
amitriptyline	Neurotec	-0.27 (-1.60; 1.07)	.
amitriptyline	pramipexole	-0.31 (-1.73; 1.11)	.
amitriptyline	clonazepam	-0.37 (-1.90; 1.17)	.
amitriptyline	nortriptyline	-0.44 (-1.78; 0.90)	.
amitriptyline	misprost	-0.47 (-1.80; 0.85)	.
amitriptyline	ALP-ITDI-LPE	-0.46 (-2.09; 1.18)	.
amitriptyline	oxcarbazepine	-0.49 (-1.94; 0.96)	.
amitriptyline	ITDI-melatonin	-0.54 (-2.12; 1.04)	.
amitriptyline	VER-PAR	-0.58 (-1.97; 0.82)	.
amitriptyline	sulodexide	-0.58 (-1.90; 0.74)	.
amitriptyline	alprazolam	-0.62 (-2.00; 0.75)	.
amitriptyline	NOR-TOP	-0.59 (-2.00; 0.81)	.
amitriptyline	zinc	-0.66 (-1.86; 0.55)	.
amitriptyline	carbamazepine	-0.65 (-2.10; 0.79)	.
amitriptyline	ITDI	-0.71 (-1.92; 0.51)	.
amitriptyline	melatonin	-0.71 (-1.98; 0.57)	.
amitriptyline	betahistine	-0.76 (-2.13; 0.61)	.
amitriptyline	neramexane	-0.76 (-2.06; 0.54)	.
amitriptyline	paroxetine	-0.80 (-2.13; 0.52)	.
amitriptyline	sertraline	-0.84 (-2.11; 0.42)	.
amitriptyline	gabapentin	-0.82 (-1.97; 0.32)	.
amitriptyline	CoQ10	-0.89 (-2.28; 0.50)	.
amitriptyline	ondansetron	-0.88 (-2.25; 0.49)	.
amitriptyline	VES-PAR	-0.94 (-2.33; 0.46)	.
amitriptyline	VitB12	-0.98 (-2.30; 0.33)	.
amitriptyline	vestipitant	-0.99 (-2.39; 0.41)	.
amitriptyline	placebo	-0.94 (-1.96; 0.08)	-0.94 (-1.96; 0.08)
amitriptyline	trazodone	-1.03 (-2.38; 0.31)	.
amitriptyline	hangekobokuto	-1.09 (-2.44; 0.26)	.
amitriptyline	EHLP	-1.06 (-2.27; 0.15)	.
amitriptyline	alprazolam-ITDI	-1.31 (-2.95; 0.33)	.
amitriptyline	oligonol	-1.27 (-2.75; 0.22)	.
amitriptyline	vardenafil	-1.29 (-2.71; 0.12)	.
amitriptyline	cilostazol	-1.86 (-3.28; -0.43)	.
lidocaine	pentoxifylline	-0.06 (-1.71; 1.58)	.
lidocaine	gabapentin-lidocaine	-0.12 (-1.64; 1.39)	.
lidocaine	GB	-0.17 (-1.60; 1.26)	.
lidocaine	acamprosate	-0.18 (-1.90; 1.54)	.
lidocaine	deanxit-clonazepam	-0.20 (-2.13; 1.73)	.
lidocaine	lipoic acid + Vit	-0.32 (-1.73; 1.09)	.
lidocaine	piribedil	-0.31 (-1.82; 1.19)	.
lidocaine	Neurotec	-0.32 (-1.82; 1.19)	.
lidocaine	pramipexole	-0.36 (-1.95; 1.23)	.
lidocaine	clonazepam	-0.41 (-2.11; 1.28)	.
lidocaine	nortriptyline	-0.49 (-2.00; 1.02)	.
lidocaine	misprost	-0.52 (-2.02; 0.97)	.
lidocaine	ALP-ITDI-LPE	-0.50 (-2.28; 1.27)	.
lidocaine	oxcarbazepine	-0.54 (-2.15; 1.07)	.
lidocaine	ITDI-melatonin	-0.59 (-2.31; 1.14)	.
lidocaine	VER-PAR	-0.62 (-2.19; 0.94)	.
lidocaine	sulodexide	-0.63 (-2.13; 0.87)	.
lidocaine	alprazolam	-0.67 (-2.21; 0.87)	.
lidocaine	NOR-TOP	-0.64 (-2.21; 0.93)	.
lidocaine	zinc	-0.71 (-2.10; 0.69)	.
lidocaine	carbamazepine	-0.70 (-2.31; 0.90)	.
lidocaine	ITDI	-0.75 (-2.16; 0.65)	.
lidocaine	melatonin	-0.76 (-2.21; 0.70)	.
lidocaine	betahistine	-0.81 (-2.35; 0.73)	.
lidocaine	neramexane	-0.81 (-2.29; 0.67)	.
lidocaine	paroxetine	-0.85 (-2.35; 0.65)	.
lidocaine	sertraline	-0.89 (-2.34; 0.55)	.
lidocaine	gabapentin	-0.87 (-2.21; 0.47)	.
lidocaine	CoQ10	-0.94 (-2.50; 0.62)	.
lidocaine	ondansetron	-0.93 (-2.47; 0.61)	.
lidocaine	VES-PAR	-0.99 (-2.55; 0.58)	.
lidocaine	VitB12	-1.03 (-2.52; 0.46)	.
lidocaine	vestipitant	-1.04 (-2.60; 0.53)	.
lidocaine	placebo	-0.99 (-2.23; 0.25)	-0.99 (-2.23; 0.25)
lidocaine	trazodone	-1.08 (-2.60; 0.43)	.
lidocaine	hangekobokuto	-1.14 (-2.67; 0.38)	.
lidocaine	EHLP	-1.11 (-2.51; 0.29)	.
lidocaine	alprazolam-ITDI	-1.36 (-3.15; 0.42)	.
lidocaine	oligonol	-1.32 (-2.96; 0.32)	.
lidocaine	vardenafil	-1.34 (-2.92; 0.24)	.
lidocaine	cilostazol	-1.90 (-3.49; -0.32)	.
pentoxifylline	gabapentin-lidocaine	-0.06 (-1.45; 1.33)	.
pentoxifylline	GB	-0.11 (-0.92; 0.70)	-0.11 (-0.92; 0.70)
pentoxifylline	acamprosate	-0.12 (-1.72; 1.49)	.
pentoxifylline	deanxit-clonazepam	-0.14 (-1.67; 1.39)	.
pentoxifylline	lipoic acid + Vit	-0.26 (-1.44; 0.91)	.
pentoxifylline	piribedil	-0.25 (-1.62; 1.12)	.
pentoxifylline	Neurotec	-0.25 (-1.63; 1.13)	.
pentoxifylline	pramipexole	-0.30 (-1.76; 1.17)	.
pentoxifylline	clonazepam	-0.35 (-1.57; 0.86)	.
pentoxifylline	nortriptyline	-0.43 (-1.81; 0.96)	.
pentoxifylline	misprost	-0.46 (-1.83; 0.91)	.
pentoxifylline	ALP-ITDI-LPE	-0.44 (-2.11; 1.23)	.
pentoxifylline	oxcarbazepine	-0.48 (-1.97; 1.01)	.
pentoxifylline	ITDI-melatonin	-0.53 (-2.14; 1.09)	.
pentoxifylline	VER-PAR	-0.56 (-2.00; 0.88)	.
pentoxifylline	sulodexide	-0.57 (-1.93; 0.80)	.
pentoxifylline	alprazolam	-0.61 (-2.02; 0.81)	.
pentoxifylline	NOR-TOP	-0.58 (-2.03; 0.87)	.
pentoxifylline	zinc	-0.64 (-1.90; 0.61)	.
pentoxifylline	carbamazepine	-0.64 (-2.12; 0.84)	.
pentoxifylline	ITDI	-0.69 (-1.96; 0.57)	.
pentoxifylline	melatonin	-0.69 (-2.02; 0.63)	.
pentoxifylline	betahistine	-0.74 (-2.16; 0.67)	.
pentoxifylline	neramexane	-0.75 (-2.09; 0.60)	.
pentoxifylline	paroxetine	-0.79 (-2.16; 0.58)	.
pentoxifylline	sertraline	-0.83 (-2.14; 0.48)	.
pentoxifylline	gabapentin	-0.81 (-2.00; 0.39)	.
pentoxifylline	CoQ10	-0.88 (-2.31; 0.56)	.
pentoxifylline	ondansetron	-0.87 (-2.28; 0.54)	.
pentoxifylline	VES-PAR	-0.92 (-2.36; 0.51)	.
pentoxifylline	VitB12	-0.97 (-2.33; 0.39)	.
pentoxifylline	vestipitant	-0.97 (-2.42; 0.47)	.
pentoxifylline	placebo	-0.92 (-2.00; 0.15)	.
pentoxifylline	trazodone	-1.02 (-2.41; 0.37)	.
pentoxifylline	hangekobokuto	-1.08 (-2.47; 0.32)	.
pentoxifylline	EHLP	-1.05 (-2.31; 0.21)	.
pentoxifylline	alprazolam-ITDI	-1.30 (-2.98; 0.38)	.
pentoxifylline	oligonol	-1.25 (-2.78; 0.27)	.
pentoxifylline	vardenafil	-1.28 (-2.73; 0.17)	.
pentoxifylline	cilostazol	-1.84 (-3.31; -0.38)	.
gabapentin-lidocaine	GB	-0.05 (-1.17; 1.08)	.
gabapentin-lidocaine	acamprosate	-0.06 (-1.53; 1.42)	.
gabapentin-lidocaine	deanxit-clonazepam	-0.08 (-1.79; 1.64)	.
gabapentin-lidocaine	lipoic acid + Vit	-0.20 (-1.30; 0.90)	.
gabapentin-lidocaine	piribedil	-0.19 (-1.41; 1.03)	.
gabapentin-lidocaine	Neurotec	-0.19 (-1.42; 1.03)	.
gabapentin-lidocaine	pramipexole	-0.24 (-1.56; 1.09)	.
gabapentin-lidocaine	clonazepam	-0.29 (-1.74; 1.15)	.
gabapentin-lidocaine	nortriptyline	-0.37 (-1.60; 0.86)	.
gabapentin-lidocaine	misprost	-0.40 (-1.61; 0.81)	.
gabapentin-lidocaine	ALP-ITDI-LPE	-0.38 (-1.93; 1.16)	.
gabapentin-lidocaine	oxcarbazepine	-0.42 (-1.77; 0.93)	.
gabapentin-lidocaine	ITDI-melatonin	-0.46 (-1.95; 1.02)	.
gabapentin-lidocaine	VER-PAR	-0.50 (-1.79; 0.79)	.
gabapentin-lidocaine	sulodexide	-0.51 (-1.72; 0.70)	.
gabapentin-lidocaine	alprazolam	-0.55 (-1.82; 0.72)	.
gabapentin-lidocaine	NOR-TOP	-0.52 (-1.82; 0.78)	.
gabapentin-lidocaine	zinc	-0.58 (-1.66; 0.50)	.
gabapentin-lidocaine	carbamazepine	-0.58 (-1.92; 0.76)	.
gabapentin-lidocaine	ITDI	-0.63 (-1.73; 0.46)	.
gabapentin-lidocaine	melatonin	-0.63 (-1.79; 0.53)	.
gabapentin-lidocaine	betahistine	-0.68 (-1.95; 0.58)	.
gabapentin-lidocaine	neramexane	-0.69 (-1.88; 0.50)	.
gabapentin-lidocaine	paroxetine	-0.73 (-1.94; 0.49)	.
gabapentin-lidocaine	sertraline	-0.77 (-1.92; 0.38)	.
gabapentin-lidocaine	gabapentin	-0.75 (-1.62; 0.12)	-0.57 (-1.52; 0.38)
gabapentin-lidocaine	CoQ10	-0.82 (-2.10; 0.47)	.
gabapentin-lidocaine	ondansetron	-0.81 (-2.07; 0.45)	.
gabapentin-lidocaine	VES-PAR	-0.86 (-2.16; 0.43)	.
gabapentin-lidocaine	VitB12	-0.91 (-2.11; 0.30)	.
gabapentin-lidocaine	vestipitant	-0.91 (-2.21; 0.38)	.
gabapentin-lidocaine	placebo	-0.86 (-1.74; 0.01)	-1.05 (-2.02; -0.09)
gabapentin-lidocaine	trazodone	-0.96 (-2.19; 0.27)	.
gabapentin-lidocaine	hangekobokuto	-1.02 (-2.26; 0.22)	.
gabapentin-lidocaine	EHLP	-0.99 (-2.08; 0.10)	.
gabapentin-lidocaine	alprazolam-ITDI	-1.24 (-2.79; 0.31)	.
gabapentin-lidocaine	oligonol	-1.19 (-2.58; 0.19)	.
gabapentin-lidocaine	vardenafil	-1.22 (-2.53; 0.09)	.
gabapentin-lidocaine	cilostazol	-1.78 (-3.10; -0.46)	.
GB	acamprosate	-0.01 (-1.40; 1.38)	.
GB	deanxit-clonazepam	-0.03 (-1.33; 1.26)	.
GB	lipoic acid + Vit	-0.15 (-1.00; 0.69)	0.33 (-0.77; 1.42)
GB	piribedil	-0.14 (-1.25; 0.97)	.
GB	Neurotec	-0.15 (-1.26; 0.97)	.
GB	pramipexole	-0.19 (-1.41; 1.03)	.
GB	clonazepam	-0.24 (-1.15; 0.66)	-0.24 (-1.15; 0.66)
GB	nortriptyline	-0.32 (-1.44; 0.80)	.
GB	misprost	-0.35 (-1.45; 0.75)	.
GB	ALP-ITDI-LPE	-0.34 (-1.79; 1.12)	.
GB	oxcarbazepine	-0.37 (-1.62; 0.88)	.
GB	ITDI-melatonin	-0.42 (-1.81; 0.98)	.
GB	VER-PAR	-0.45 (-1.64; 0.73)	.
GB	sulodexide	-0.46 (-1.56; 0.64)	.
GB	alprazolam	-0.50 (-1.66; 0.66)	.
GB	NOR-TOP	-0.47 (-1.67; 0.73)	.
GB	zinc	-0.54 (-1.49; 0.42)	.
GB	carbamazepine	-0.53 (-1.77; 0.71)	.
GB	ITDI	-0.59 (-1.56; 0.39)	.
GB	melatonin	-0.59 (-1.63; 0.46)	.
GB	betahistine	-0.64 (-1.79; 0.52)	.
GB	neramexane	-0.64 (-1.72; 0.43)	.
GB	paroxetine	-0.68 (-1.79; 0.42)	.
GB	sertraline	-0.72 (-1.75; 0.31)	.
GB	gabapentin	-0.70 (-1.58; 0.18)	.
GB	CoQ10	-0.77 (-1.95; 0.41)	.
GB	ondansetron	-0.76 (-1.92; 0.39)	.
GB	VES-PAR	-0.82 (-2.00; 0.37)	.
GB	VitB12	-0.86 (-1.96; 0.23)	.
GB	vestipitant	-0.87 (-2.06; 0.32)	.
GB	placebo	-0.82 (-1.53; -0.11)	-0.80 (-1.54; -0.06)
GB	trazodone	-0.91 (-2.04; 0.21)	.
GB	hangekobokuto	-0.97 (-2.11; 0.16)	.
GB	EHLP	-0.94 (-1.90; 0.02)	.
GB	alprazolam-ITDI	-1.19 (-2.66; 0.27)	.
GB	oligonol	-1.15 (-2.44; 0.14)	.
GB	vardenafil	-1.17 (-2.38; 0.03)	.
GB	cilostazol	-1.73 (-2.95; -0.52)	.
acamprosate	deanxit-clonazepam	-0.02 (-1.92; 1.87)	.
acamprosate	lipoic acid + Vit	-0.15 (-1.51; 1.22)	.
acamprosate	piribedil	-0.13 (-1.60; 1.33)	.
acamprosate	Neurotec	-0.14 (-1.60; 1.33)	.
acamprosate	pramipexole	-0.18 (-1.73; 1.37)	.
acamprosate	clonazepam	-0.24 (-1.89; 1.42)	.
acamprosate	nortriptyline	-0.31 (-1.79; 1.16)	.
acamprosate	misprost	-0.34 (-1.80; 1.11)	.
acamprosate	ALP-ITDI-LPE	-0.33 (-2.07; 1.42)	.
acamprosate	oxcarbazepine	-0.36 (-1.93; 1.21)	.
acamprosate	ITDI-melatonin	-0.41 (-2.10; 1.28)	.
acamprosate	VER-PAR	-0.44 (-1.97; 1.08)	.
acamprosate	sulodexide	-0.45 (-1.91; 1.01)	.
acamprosate	alprazolam	-0.49 (-2.00; 1.01)	.
acamprosate	NOR-TOP	-0.46 (-2.00; 1.07)	.
acamprosate	zinc	-0.53 (-1.88; 0.82)	.
acamprosate	carbamazepine	-0.52 (-2.09; 1.04)	.
acamprosate	ITDI	-0.58 (-1.94; 0.79)	.
acamprosate	melatonin	-0.58 (-1.99; 0.84)	.
acamprosate	betahistine	-0.63 (-2.13; 0.87)	.
acamprosate	neramexane	-0.63 (-2.07; 0.81)	.
acamprosate	paroxetine	-0.67 (-2.13; 0.79)	.
acamprosate	sertraline	-0.71 (-2.12; 0.69)	.
acamprosate	gabapentin	-0.69 (-1.99; 0.61)	.
acamprosate	CoQ10	-0.76 (-2.28; 0.76)	.
acamprosate	ondansetron	-0.75 (-2.26; 0.75)	.
acamprosate	VES-PAR	-0.81 (-2.33; 0.72)	.
acamprosate	VitB12	-0.85 (-2.31; 0.60)	.
acamprosate	vestipitant	-0.86 (-2.39; 0.67)	.
acamprosate	placebo	-0.81 (-2.00; 0.38)	-0.81 (-2.00; 0.38)
acamprosate	trazodone	-0.90 (-2.38; 0.57)	.
acamprosate	hangekobokuto	-0.96 (-2.45; 0.52)	.
acamprosate	EHLP	-0.93 (-2.29; 0.42)	.
acamprosate	alprazolam-ITDI	-1.18 (-2.93; 0.57)	.
acamprosate	oligonol	-1.14 (-2.74; 0.47)	.
acamprosate	vardenafil	-1.16 (-2.70; 0.38)	.
acamprosate	cilostazol	-1.73 (-3.27; -0.18)	.
deanxit-clonazepam	lipoic acid + Vit	-0.12 (-1.67; 1.43)	.
deanxit-clonazepam	piribedil	-0.11 (-1.82; 1.59)	.
deanxit-clonazepam	Neurotec	-0.11 (-1.82; 1.59)	.
deanxit-clonazepam	pramipexole	-0.16 (-1.93; 1.62)	.
deanxit-clonazepam	clonazepam	-0.21 (-1.14; 0.71)	-0.21 (-1.14; 0.71)
deanxit-clonazepam	nortriptyline	-0.29 (-2.00; 1.42)	.
deanxit-clonazepam	misprost	-0.32 (-2.02; 1.38)	.
deanxit-clonazepam	ALP-ITDI-LPE	-0.30 (-2.25; 1.65)	.
deanxit-clonazepam	oxcarbazepine	-0.34 (-2.14; 1.46)	.
deanxit-clonazepam	ITDI-melatonin	-0.39 (-2.29; 1.52)	.
deanxit-clonazepam	VER-PAR	-0.42 (-2.18; 1.33)	.
deanxit-clonazepam	sulodexide	-0.43 (-2.13; 1.27)	.
deanxit-clonazepam	alprazolam	-0.47 (-2.21; 1.27)	.
deanxit-clonazepam	NOR-TOP	-0.44 (-2.20; 1.33)	.
deanxit-clonazepam	zinc	-0.50 (-2.11; 1.10)	.
deanxit-clonazepam	carbamazepine	-0.50 (-2.29; 1.29)	.
deanxit-clonazepam	ITDI	-0.55 (-2.17; 1.07)	.
deanxit-clonazepam	melatonin	-0.55 (-2.22; 1.11)	.
deanxit-clonazepam	betahistine	-0.60 (-2.34; 1.13)	.
deanxit-clonazepam	neramexane	-0.61 (-2.29; 1.07)	.
deanxit-clonazepam	paroxetine	-0.65 (-2.35; 1.05)	.
deanxit-clonazepam	sertraline	-0.69 (-2.35; 0.96)	.
deanxit-clonazepam	gabapentin	-0.67 (-2.23; 0.90)	.
deanxit-clonazepam	CoQ10	-0.74 (-2.49; 1.02)	.
deanxit-clonazepam	ondansetron	-0.73 (-2.47; 1.01)	.
deanxit-clonazepam	VES-PAR	-0.78 (-2.54; 0.97)	.
deanxit-clonazepam	VitB12	-0.83 (-2.52; 0.86)	.
deanxit-clonazepam	vestipitant	-0.84 (-2.59; 0.92)	.
deanxit-clonazepam	placebo	-0.78 (-2.26; 0.69)	.
deanxit-clonazepam	trazodone	-0.88 (-2.60; 0.83)	.
deanxit-clonazepam	hangekobokuto	-0.94 (-2.66; 0.78)	.
deanxit-clonazepam	EHLP	-0.91 (-2.52; 0.70)	.
deanxit-clonazepam	alprazolam-ITDI	-1.16 (-3.12; 0.80)	.
deanxit-clonazepam	oligonol	-1.11 (-2.94; 0.71)	.
deanxit-clonazepam	vardenafil	-1.14 (-2.91; 0.63)	.
deanxit-clonazepam	cilostazol	-1.70 (-3.48; 0.08)	.
lipoic acid + Vit	piribedil	0.01 (-1.07; 1.10)	.
lipoic acid + Vit	Neurotec	0.01 (-1.08; 1.10)	.
lipoic acid + Vit	pramipexole	-0.03 (-1.23; 1.16)	.
lipoic acid + Vit	clonazepam	-0.09 (-1.33; 1.15)	.
lipoic acid + Vit	nortriptyline	-0.17 (-1.26; 0.93)	.
lipoic acid + Vit	misprost	-0.20 (-1.27; 0.88)	.
lipoic acid + Vit	ALP-ITDI-LPE	-0.18 (-1.62; 1.26)	.
lipoic acid + Vit	oxcarbazepine	-0.22 (-1.44; 1.01)	.
lipoic acid + Vit	ITDI-melatonin	-0.26 (-1.64; 1.11)	.
lipoic acid + Vit	VER-PAR	-0.30 (-1.47; 0.87)	.
lipoic acid + Vit	sulodexide	-0.31 (-1.38; 0.77)	.
lipoic acid + Vit	alprazolam	-0.35 (-1.48; 0.79)	.
lipoic acid + Vit	NOR-TOP	-0.32 (-1.49; 0.86)	.
lipoic acid + Vit	zinc	-0.38 (-1.31; 0.54)	.
lipoic acid + Vit	carbamazepine	-0.38 (-1.60; 0.84)	.
lipoic acid + Vit	ITDI	-0.43 (-1.37; 0.51)	.
lipoic acid + Vit	melatonin	-0.43 (-1.45; 0.59)	.
lipoic acid + Vit	betahistine	-0.48 (-1.61; 0.65)	.
lipoic acid + Vit	neramexane	-0.49 (-1.54; 0.56)	.
lipoic acid + Vit	paroxetine	-0.53 (-1.61; 0.55)	.
lipoic acid + Vit	sertraline	-0.57 (-1.57; 0.44)	.
lipoic acid + Vit	gabapentin	-0.55 (-1.40; 0.30)	.
lipoic acid + Vit	CoQ10	-0.61 (-1.77; 0.54)	.
lipoic acid + Vit	ondansetron	-0.61 (-1.74; 0.53)	.
lipoic acid + Vit	VES-PAR	-0.66 (-1.83; 0.50)	.
lipoic acid + Vit	VitB12	-0.71 (-1.78; 0.36)	.
lipoic acid + Vit	vestipitant	-0.71 (-1.88; 0.46)	.
lipoic acid + Vit	placebo	-0.66 (-1.33; 0.01)	-0.46 (-1.15; 0.23)
lipoic acid + Vit	trazodone	-0.76 (-1.86; 0.34)	.
lipoic acid + Vit	hangekobokuto	-0.82 (-1.93; 0.29)	.
lipoic acid + Vit	EHLP	-0.79 (-1.72; 0.15)	.
lipoic acid + Vit	alprazolam-ITDI	-1.04 (-2.49; 0.41)	.
lipoic acid + Vit	oligonol	-0.99 (-2.26; 0.28)	.
lipoic acid + Vit	vardenafil	-1.02 (-2.20; 0.17)	.
lipoic acid + Vit	cilostazol	-1.58 (-2.78; -0.38)	.
piribedil	Neurotec	-0.00 (-1.21; 1.21)	.
piribedil	pramipexole	-0.05 (-1.35; 1.26)	.
piribedil	clonazepam	-0.10 (-1.53; 1.33)	.
piribedil	nortriptyline	-0.18 (-1.39; 1.04)	.
piribedil	misprost	-0.21 (-1.40; 0.98)	.
piribedil	ALP-ITDI-LPE	-0.19 (-1.72; 1.34)	.
piribedil	oxcarbazepine	-0.23 (-1.56; 1.11)	.
piribedil	ITDI-melatonin	-0.27 (-1.75; 1.20)	.
piribedil	VER-PAR	-0.31 (-1.59; 0.97)	.
piribedil	sulodexide	-0.32 (-1.51; 0.88)	.
piribedil	alprazolam	-0.36 (-1.61; 0.89)	.
piribedil	NOR-TOP	-0.33 (-1.62; 0.96)	.
piribedil	zinc	-0.39 (-1.46; 0.67)	.
piribedil	carbamazepine	-0.39 (-1.72; 0.94)	.
piribedil	ITDI	-0.44 (-1.52; 0.64)	.
piribedil	melatonin	-0.44 (-1.59; 0.70)	.
piribedil	betahistine	-0.49 (-1.74; 0.75)	.
piribedil	neramexane	-0.50 (-1.67; 0.68)	.
piribedil	paroxetine	-0.54 (-1.74; 0.66)	.
piribedil	sertraline	-0.58 (-1.71; 0.55)	.
piribedil	gabapentin	-0.56 (-1.55; 0.44)	.
piribedil	CoQ10	-0.63 (-1.90; 0.64)	.
piribedil	ondansetron	-0.62 (-1.87; 0.63)	.
piribedil	VES-PAR	-0.67 (-1.95; 0.60)	.
piribedil	VitB12	-0.72 (-1.91; 0.47)	.
piribedil	vestipitant	-0.72 (-2.00; 0.56)	.
piribedil	placebo	-0.67 (-1.52; 0.18)	-0.67 (-1.52; 0.18)
piribedil	trazodone	-0.77 (-1.99; 0.45)	.
piribedil	hangekobokuto	-0.83 (-2.06; 0.40)	.
piribedil	EHLP	-0.80 (-1.87; 0.27)	.
piribedil	alprazolam-ITDI	-1.05 (-2.59; 0.49)	.
piribedil	oligonol	-1.00 (-2.38; 0.37)	.
piribedil	vardenafil	-1.03 (-2.32; 0.27)	.
piribedil	cilostazol	-1.59 (-2.90; -0.29)	.
Neurotec	pramipexole	-0.04 (-1.35; 1.27)	.
Neurotec	clonazepam	-0.10 (-1.54; 1.34)	.
Neurotec	nortriptyline	-0.18 (-1.40; 1.05)	.
Neurotec	misprost	-0.21 (-1.41; 0.99)	.
Neurotec	ALP-ITDI-LPE	-0.19 (-1.73; 1.35)	.
Neurotec	oxcarbazepine	-0.23 (-1.56; 1.11)	.
Neurotec	ITDI-melatonin	-0.27 (-1.75; 1.21)	.
Neurotec	VER-PAR	-0.31 (-1.59; 0.97)	.
Neurotec	sulodexide	-0.31 (-1.52; 0.89)	.
Neurotec	alprazolam	-0.36 (-1.61; 0.90)	.
Neurotec	NOR-TOP	-0.33 (-1.62; 0.97)	.
Neurotec	zinc	-0.39 (-1.46; 0.68)	.
Neurotec	carbamazepine	-0.39 (-1.72; 0.94)	.
Neurotec	ITDI	-0.44 (-1.52; 0.64)	.
Neurotec	melatonin	-0.44 (-1.59; 0.71)	.
Neurotec	betahistine	-0.49 (-1.74; 0.76)	.
Neurotec	neramexane	-0.49 (-1.67; 0.68)	.
Neurotec	paroxetine	-0.54 (-1.74; 0.67)	.
Neurotec	sertraline	-0.58 (-1.72; 0.56)	.
Neurotec	gabapentin	-0.56 (-1.56; 0.45)	.
Neurotec	CoQ10	-0.62 (-1.90; 0.65)	.
Neurotec	ondansetron	-0.62 (-1.87; 0.64)	.
Neurotec	VES-PAR	-0.67 (-1.95; 0.61)	.
Neurotec	VitB12	-0.72 (-1.91; 0.48)	.
Neurotec	vestipitant	-0.72 (-2.01; 0.56)	.
Neurotec	placebo	-0.67 (-1.53; 0.19)	-0.67 (-1.53; 0.19)
Neurotec	trazodone	-0.77 (-1.99; 0.46)	.
Neurotec	hangekobokuto	-0.83 (-2.06; 0.41)	.
Neurotec	EHLP	-0.80 (-1.87; 0.28)	.
Neurotec	alprazolam-ITDI	-1.05 (-2.59; 0.50)	.
Neurotec	oligonol	-1.00 (-2.38; 0.38)	.
Neurotec	vardenafil	-1.03 (-2.33; 0.27)	.
Neurotec	cilostazol	-1.59 (-2.90; -0.28)	.
pramipexole	clonazepam	-0.06 (-1.58; 1.46)	.
pramipexole	nortriptyline	-0.13 (-1.45; 1.18)	.
pramipexole	misprost	-0.16 (-1.46; 1.13)	.
pramipexole	ALP-ITDI-LPE	-0.15 (-1.76; 1.47)	.
pramipexole	oxcarbazepine	-0.18 (-1.61; 1.24)	.
pramipexole	ITDI-melatonin	-0.23 (-1.79; 1.33)	.
pramipexole	VER-PAR	-0.27 (-1.64; 1.11)	.
pramipexole	sulodexide	-0.27 (-1.57; 1.03)	.
pramipexole	alprazolam	-0.31 (-1.66; 1.04)	.
pramipexole	NOR-TOP	-0.28 (-1.67; 1.10)	.
pramipexole	zinc	-0.35 (-1.53; 0.83)	.
pramipexole	carbamazepine	-0.34 (-1.77; 1.08)	.
pramipexole	ITDI	-0.40 (-1.59; 0.80)	.
pramipexole	melatonin	-0.40 (-1.65; 0.86)	.
pramipexole	betahistine	-0.45 (-1.79; 0.90)	.
pramipexole	neramexane	-0.45 (-1.73; 0.83)	.
pramipexole	paroxetine	-0.49 (-1.80; 0.81)	.
pramipexole	sertraline	-0.54 (-1.78; 0.71)	.
pramipexole	gabapentin	-0.51 (-1.63; 0.61)	.
pramipexole	CoQ10	-0.58 (-1.95; 0.79)	.
pramipexole	ondansetron	-0.57 (-1.92; 0.77)	.
pramipexole	VES-PAR	-0.63 (-2.00; 0.75)	.
pramipexole	VitB12	-0.67 (-1.97; 0.62)	.
pramipexole	vestipitant	-0.68 (-2.06; 0.70)	.
pramipexole	placebo	-0.63 (-1.62; 0.36)	-0.63 (-1.62; 0.36)
pramipexole	trazodone	-0.72 (-2.04; 0.60)	.
pramipexole	hangekobokuto	-0.78 (-2.11; 0.55)	.
pramipexole	EHLP	-0.75 (-1.94; 0.43)	.
pramipexole	alprazolam-ITDI	-1.00 (-2.63; 0.62)	.
pramipexole	oligonol	-0.96 (-2.42; 0.50)	.
pramipexole	vardenafil	-0.98 (-2.37; 0.41)	.
pramipexole	cilostazol	-1.55 (-2.95; -0.14)	.
clonazepam	nortriptyline	-0.08 (-1.52; 1.36)	.
clonazepam	misprost	-0.11 (-1.53; 1.32)	.
clonazepam	ALP-ITDI-LPE	-0.09 (-1.81; 1.63)	.
clonazepam	oxcarbazepine	-0.13 (-1.67; 1.42)	.
clonazepam	ITDI-melatonin	-0.17 (-1.84; 1.49)	.
clonazepam	VER-PAR	-0.21 (-1.70; 1.28)	.
clonazepam	sulodexide	-0.22 (-1.64; 1.21)	.
clonazepam	alprazolam	-0.26 (-1.73; 1.21)	.
clonazepam	NOR-TOP	-0.23 (-1.73; 1.28)	.
clonazepam	zinc	-0.29 (-1.61; 1.02)	.
clonazepam	carbamazepine	-0.29 (-1.82; 1.25)	.
clonazepam	ITDI	-0.34 (-1.67; 0.99)	.
clonazepam	melatonin	-0.34 (-1.72; 1.04)	.
clonazepam	betahistine	-0.39 (-1.86; 1.08)	.
clonazepam	neramexane	-0.40 (-1.80; 1.01)	.
clonazepam	paroxetine	-0.44 (-1.86; 0.99)	.
clonazepam	sertraline	-0.48 (-1.85; 0.89)	.
clonazepam	gabapentin	-0.46 (-1.72; 0.81)	.
clonazepam	CoQ10	-0.52 (-2.01; 0.96)	.
clonazepam	ondansetron	-0.52 (-1.99; 0.95)	.
clonazepam	VES-PAR	-0.57 (-2.07; 0.92)	.
clonazepam	VitB12	-0.62 (-2.04; 0.80)	.
clonazepam	vestipitant	-0.62 (-2.12; 0.87)	.
clonazepam	placebo	-0.57 (-1.72; 0.58)	.
clonazepam	trazodone	-0.67 (-2.11; 0.78)	.
clonazepam	hangekobokuto	-0.73 (-2.18; 0.72)	.
clonazepam	EHLP	-0.70 (-2.02; 0.62)	.
clonazepam	alprazolam-ITDI	-0.95 (-2.67; 0.78)	.
clonazepam	oligonol	-0.90 (-2.48; 0.67)	.
clonazepam	vardenafil	-0.93 (-2.44; 0.58)	.
clonazepam	cilostazol	-1.49 (-3.01; 0.03)	.
nortriptyline	misprost	-0.03 (-1.24; 1.17)	.
nortriptyline	ALP-ITDI-LPE	-0.01 (-1.56; 1.53)	.
nortriptyline	oxcarbazepine	-0.05 (-1.39; 1.29)	.
nortriptyline	ITDI-melatonin	-0.10 (-1.58; 1.39)	.
nortriptyline	VER-PAR	-0.13 (-1.42; 1.16)	.
nortriptyline	sulodexide	-0.14 (-1.35; 1.07)	.
nortriptyline	alprazolam	-0.18 (-1.44; 1.08)	.
nortriptyline	NOR-TOP	-0.15 (-1.45; 1.15)	.
nortriptyline	zinc	-0.21 (-1.29; 0.86)	.
nortriptyline	carbamazepine	-0.21 (-1.55; 1.13)	.
nortriptyline	ITDI	-0.26 (-1.35; 0.83)	.
nortriptyline	melatonin	-0.26 (-1.42; 0.89)	.
nortriptyline	betahistine	-0.32 (-1.57; 0.94)	.
nortriptyline	neramexane	-0.32 (-1.50; 0.87)	.
nortriptyline	paroxetine	-0.36 (-1.57; 0.85)	.
nortriptyline	sertraline	-0.40 (-1.55; 0.74)	.
nortriptyline	gabapentin	-0.38 (-1.39; 0.63)	.
nortriptyline	CoQ10	-0.45 (-1.73; 0.83)	.
nortriptyline	ondansetron	-0.44 (-1.70; 0.82)	.
nortriptyline	VES-PAR	-0.50 (-1.78; 0.79)	.
nortriptyline	VitB12	-0.54 (-1.74; 0.66)	.
nortriptyline	vestipitant	-0.55 (-1.84; 0.75)	.
nortriptyline	placebo	-0.50 (-1.36; 0.37)	-0.50 (-1.36; 0.37)
nortriptyline	trazodone	-0.59 (-1.82; 0.64)	.
nortriptyline	hangekobokuto	-0.65 (-1.89; 0.59)	.
nortriptyline	EHLP	-0.62 (-1.70; 0.46)	.
nortriptyline	alprazolam-ITDI	-0.87 (-2.42; 0.68)	.
nortriptyline	oligonol	-0.83 (-2.21; 0.56)	.
nortriptyline	vardenafil	-0.85 (-2.16; 0.45)	.
nortriptyline	cilostazol	-1.41 (-2.73; -0.10)	.
misprost	ALP-ITDI-LPE	0.02 (-1.51; 1.54)	.
misprost	oxcarbazepine	-0.02 (-1.34; 1.31)	.
misprost	ITDI-melatonin	-0.06 (-1.53; 1.40)	.
misprost	VER-PAR	-0.10 (-1.37; 1.17)	.
misprost	sulodexide	-0.11 (-1.29; 1.08)	.
misprost	alprazolam	-0.15 (-1.39; 1.09)	.
misprost	NOR-TOP	-0.12 (-1.40; 1.16)	.
misprost	zinc	-0.18 (-1.23; 0.87)	.
misprost	carbamazepine	-0.18 (-1.50; 1.14)	.
misprost	ITDI	-0.23 (-1.30; 0.84)	.
misprost	melatonin	-0.23 (-1.37; 0.90)	.
misprost	betahistine	-0.28 (-1.52; 0.95)	.
misprost	neramexane	-0.29 (-1.45; 0.88)	.
misprost	paroxetine	-0.33 (-1.52; 0.86)	.
misprost	sertraline	-0.37 (-1.49; 0.75)	.
misprost	gabapentin	-0.35 (-1.33; 0.64)	.
misprost	CoQ10	-0.42 (-1.68; 0.85)	.
misprost	ondansetron	-0.41 (-1.65; 0.83)	.
misprost	VES-PAR	-0.46 (-1.73; 0.81)	.
misprost	VitB12	-0.51 (-1.69; 0.67)	.
misprost	vestipitant	-0.51 (-1.79; 0.76)	.
misprost	placebo	-0.46 (-1.30; 0.37)	-0.46 (-1.30; 0.37)
misprost	trazodone	-0.56 (-1.77; 0.65)	.
misprost	hangekobokuto	-0.62 (-1.84; 0.60)	.
misprost	EHLP	-0.59 (-1.65; 0.47)	.
misprost	alprazolam-ITDI	-0.84 (-2.37; 0.69)	.
misprost	oligonol	-0.79 (-2.16; 0.57)	.
misprost	vardenafil	-0.82 (-2.11; 0.47)	.
misprost	cilostazol	-1.38 (-2.68; -0.08)	.
ALP-ITDI-LPE	oxcarbazepine	-0.04 (-1.67; 1.60)	.
ALP-ITDI-LPE	ITDI-melatonin	-0.08 (-1.84; 1.67)	.
ALP-ITDI-LPE	VER-PAR	-0.12 (-1.71; 1.47)	.
ALP-ITDI-LPE	sulodexide	-0.13 (-1.65; 1.40)	.
ALP-ITDI-LPE	alprazolam	-0.17 (-1.05; 0.72)	-0.17 (-1.05; 0.72)
ALP-ITDI-LPE	NOR-TOP	-0.14 (-1.74; 1.46)	.
ALP-ITDI-LPE	zinc	-0.20 (-1.63; 1.22)	.
ALP-ITDI-LPE	carbamazepine	-0.20 (-1.83; 1.43)	.
ALP-ITDI-LPE	ITDI	-0.25 (-1.69; 1.19)	.
ALP-ITDI-LPE	melatonin	-0.25 (-1.74; 1.24)	.
ALP-ITDI-LPE	betahistine	-0.30 (-1.87; 1.26)	.
ALP-ITDI-LPE	neramexane	-0.31 (-1.81; 1.20)	.
ALP-ITDI-LPE	paroxetine	-0.35 (-1.88; 1.18)	.
ALP-ITDI-LPE	sertraline	-0.39 (-1.87; 1.09)	.
ALP-ITDI-LPE	gabapentin	-0.37 (-1.74; 1.01)	.
ALP-ITDI-LPE	CoQ10	-0.43 (-2.02; 1.15)	.
ALP-ITDI-LPE	ondansetron	-0.43 (-2.00; 1.14)	.
ALP-ITDI-LPE	VES-PAR	-0.48 (-2.07; 1.11)	.
ALP-ITDI-LPE	VitB12	-0.53 (-2.05; 0.99)	.
ALP-ITDI-LPE	vestipitant	-0.53 (-2.13; 1.06)	.
ALP-ITDI-LPE	placebo	-0.48 (-1.76; 0.79)	.
ALP-ITDI-LPE	trazodone	-0.58 (-2.12; 0.97)	.
ALP-ITDI-LPE	hangekobokuto	-0.64 (-2.19; 0.91)	.
ALP-ITDI-LPE	EHLP	-0.61 (-2.04; 0.82)	.
ALP-ITDI-LPE	alprazolam-ITDI	-0.86 (-1.77; 0.05)	-0.86 (-1.77; 0.05)
ALP-ITDI-LPE	oligonol	-0.81 (-2.48; 0.86)	.
ALP-ITDI-LPE	vardenafil	-0.84 (-2.44; 0.77)	.
ALP-ITDI-LPE	cilostazol	-1.40 (-3.01; 0.21)	.
oxcarbazepine	ITDI-melatonin	-0.05 (-1.63; 1.53)	.
oxcarbazepine	VER-PAR	-0.08 (-1.48; 1.32)	.
oxcarbazepine	sulodexide	-0.09 (-1.42; 1.24)	.
oxcarbazepine	alprazolam	-0.13 (-1.51; 1.24)	.
oxcarbazepine	NOR-TOP	-0.10 (-1.51; 1.31)	.
oxcarbazepine	zinc	-0.16 (-1.37; 1.04)	.
oxcarbazepine	carbamazepine	-0.16 (-1.17; 0.85)	-0.16 (-1.17; 0.85)
oxcarbazepine	ITDI	-0.21 (-1.43; 1.01)	.
oxcarbazepine	melatonin	-0.21 (-1.50; 1.07)	.
oxcarbazepine	betahistine	-0.27 (-1.64; 1.11)	.
oxcarbazepine	neramexane	-0.27 (-1.57; 1.04)	.
oxcarbazepine	paroxetine	-0.31 (-1.64; 1.02)	.
oxcarbazepine	sertraline	-0.35 (-1.62; 0.92)	.
oxcarbazepine	gabapentin	-0.33 (-1.48; 0.82)	.
oxcarbazepine	CoQ10	-0.40 (-1.79; 1.00)	.
oxcarbazepine	ondansetron	-0.39 (-1.77; 0.98)	.
oxcarbazepine	VES-PAR	-0.45 (-1.85; 0.96)	.
oxcarbazepine	VitB12	-0.49 (-1.81; 0.83)	.
oxcarbazepine	vestipitant	-0.50 (-1.90; 0.91)	.
oxcarbazepine	placebo	-0.45 (-1.47; 0.58)	-0.45 (-1.47; 0.58)
oxcarbazepine	trazodone	-0.54 (-1.89; 0.81)	.
oxcarbazepine	hangekobokuto	-0.60 (-1.96; 0.75)	.
oxcarbazepine	EHLP	-0.57 (-1.79; 0.64)	.
oxcarbazepine	alprazolam-ITDI	-0.82 (-2.46; 0.82)	.
oxcarbazepine	oligonol	-0.78 (-2.26; 0.71)	.
oxcarbazepine	vardenafil	-0.80 (-2.22; 0.61)	.
oxcarbazepine	cilostazol	-1.36 (-2.79; 0.06)	.
ITDI-melatonin	VER-PAR	-0.04 (-1.57; 1.50)	.
ITDI-melatonin	sulodexide	-0.04 (-1.51; 1.42)	.
ITDI-melatonin	alprazolam	-0.08 (-1.60; 1.43)	.
ITDI-melatonin	NOR-TOP	-0.05 (-1.60; 1.49)	.
ITDI-melatonin	zinc	-0.12 (-1.48; 1.24)	.
ITDI-melatonin	carbamazepine	-0.12 (-1.69; 1.46)	.
ITDI-melatonin	ITDI	-0.17 (-1.54; 1.21)	.
ITDI-melatonin	melatonin	-0.17 (-1.10; 0.76)	-0.17 (-1.10; 0.76)
ITDI-melatonin	betahistine	-0.22 (-1.73; 1.29)	.
ITDI-melatonin	neramexane	-0.22 (-1.67; 1.23)	.
ITDI-melatonin	paroxetine	-0.26 (-1.73; 1.21)	.
ITDI-melatonin	sertraline	-0.31 (-1.49; 0.88)	.
ITDI-melatonin	gabapentin	-0.28 (-1.59; 1.03)	.
ITDI-melatonin	CoQ10	-0.35 (-1.88; 1.18)	.
ITDI-melatonin	ondansetron	-0.35 (-1.86; 1.17)	.
ITDI-melatonin	VES-PAR	-0.40 (-1.93; 1.14)	.
ITDI-melatonin	VitB12	-0.44 (-1.91; 1.02)	.
ITDI-melatonin	vestipitant	-0.45 (-1.99; 1.09)	.
ITDI-melatonin	placebo	-0.40 (-1.60; 0.80)	.
ITDI-melatonin	trazodone	-0.49 (-1.98; 0.99)	.
ITDI-melatonin	hangekobokuto	-0.55 (-2.05; 0.94)	.
ITDI-melatonin	EHLP	-0.52 (-1.89; 0.84)	.
ITDI-melatonin	alprazolam-ITDI	-0.77 (-2.53; 0.98)	.
ITDI-melatonin	oligonol	-0.73 (-2.34; 0.88)	.
ITDI-melatonin	vardenafil	-0.75 (-2.30; 0.79)	.
ITDI-melatonin	cilostazol	-1.32 (-2.87; 0.24)	.
VER-PAR	sulodexide	-0.01 (-1.28; 1.26)	.
VER-PAR	alprazolam	-0.05 (-1.37; 1.27)	.
VER-PAR	NOR-TOP	-0.02 (-1.00; 0.96)	-0.02 (-1.00; 0.96)
VER-PAR	zinc	-0.08 (-1.23; 1.06)	.
VER-PAR	carbamazepine	-0.08 (-1.47; 1.32)	.
VER-PAR	ITDI	-0.13 (-1.29; 1.03)	.
VER-PAR	melatonin	-0.13 (-1.35; 1.09)	.
VER-PAR	betahistine	-0.18 (-1.50; 1.13)	.
VER-PAR	neramexane	-0.19 (-1.43; 1.06)	.
VER-PAR	paroxetine	-0.23 (-1.50; 1.05)	.
VER-PAR	sertraline	-0.27 (-1.48; 0.94)	.
VER-PAR	gabapentin	-0.25 (-1.33; 0.84)	.
VER-PAR	CoQ10	-0.31 (-1.65; 1.02)	.
VER-PAR	ondansetron	-0.31 (-1.63; 1.01)	.
VER-PAR	VES-PAR	-0.36 (-1.71; 0.98)	.
VER-PAR	VitB12	-0.41 (-1.67; 0.86)	.
VER-PAR	vestipitant	-0.41 (-1.76; 0.94)	.
VER-PAR	placebo	-0.36 (-1.31; 0.59)	-0.36 (-1.31; 0.59)
VER-PAR	trazodone	-0.46 (-1.75; 0.83)	.
VER-PAR	hangekobokuto	-0.52 (-1.82; 0.78)	.
VER-PAR	EHLP	-0.49 (-1.64; 0.67)	.
VER-PAR	alprazolam-ITDI	-0.74 (-2.34; 0.86)	.
VER-PAR	oligonol	-0.69 (-2.13; 0.74)	.
VER-PAR	vardenafil	-0.72 (-2.08; 0.64)	.
VER-PAR	cilostazol	-1.28 (-2.65; 0.09)	.
sulodexide	alprazolam	-0.04 (-1.29; 1.20)	.
sulodexide	NOR-TOP	-0.01 (-1.29; 1.27)	.
sulodexide	zinc	-0.08 (-1.13; 0.98)	.
sulodexide	carbamazepine	-0.07 (-1.39; 1.25)	.
sulodexide	ITDI	-0.12 (-1.19; 0.94)	.
sulodexide	melatonin	-0.13 (-1.26; 1.01)	.
sulodexide	betahistine	-0.18 (-1.42; 1.06)	.
sulodexide	neramexane	-0.18 (-1.34; 0.99)	.
sulodexide	paroxetine	-0.22 (-1.41; 0.97)	.
sulodexide	sertraline	-0.26 (-1.39; 0.86)	.
sulodexide	gabapentin	-0.24 (-1.23; 0.75)	.
sulodexide	CoQ10	-0.31 (-1.57; 0.95)	.
sulodexide	ondansetron	-0.30 (-1.54; 0.94)	.
sulodexide	VES-PAR	-0.36 (-1.63; 0.91)	.
sulodexide	VitB12	-0.40 (-1.58; 0.78)	.
sulodexide	vestipitant	-0.41 (-1.68; 0.87)	.
sulodexide	placebo	-0.36 (-1.20; 0.48)	-0.36 (-1.20; 0.48)
sulodexide	trazodone	-0.45 (-1.66; 0.76)	.
sulodexide	hangekobokuto	-0.51 (-1.73; 0.71)	.
sulodexide	EHLP	-0.48 (-1.54; 0.58)	.
sulodexide	alprazolam-ITDI	-0.73 (-2.27; 0.80)	.
sulodexide	oligonol	-0.69 (-2.05; 0.68)	.
sulodexide	vardenafil	-0.71 (-2.00; 0.58)	.
sulodexide	cilostazol	-1.27 (-2.57; 0.02)	.
alprazolam	NOR-TOP	0.03 (-1.30; 1.36)	.
alprazolam	zinc	-0.03 (-1.15; 1.08)	.
alprazolam	carbamazepine	-0.03 (-1.40; 1.34)	.
alprazolam	ITDI	-0.08 (-1.21; 1.05)	.
alprazolam	melatonin	-0.08 (-1.28; 1.11)	.
alprazolam	betahistine	-0.13 (-1.43; 1.16)	.
alprazolam	neramexane	-0.14 (-1.36; 1.08)	.
alprazolam	paroxetine	-0.18 (-1.43; 1.07)	.
alprazolam	sertraline	-0.22 (-1.40; 0.96)	.
alprazolam	gabapentin	-0.20 (-1.25; 0.85)	.
alprazolam	CoQ10	-0.27 (-1.58; 1.05)	.
alprazolam	ondansetron	-0.26 (-1.55; 1.03)	.
alprazolam	VES-PAR	-0.31 (-1.64; 1.01)	.
alprazolam	VitB12	-0.36 (-1.60; 0.88)	.
alprazolam	vestipitant	-0.36 (-1.69; 0.96)	.
alprazolam	placebo	-0.31 (-1.23; 0.60)	-0.31 (-1.23; 0.60)
alprazolam	trazodone	-0.41 (-1.68; 0.85)	.
alprazolam	hangekobokuto	-0.47 (-1.74; 0.80)	.
alprazolam	EHLP	-0.44 (-1.56; 0.68)	.
alprazolam	alprazolam-ITDI	-0.69 (-1.59; 0.21)	-0.69 (-1.59; 0.21)
alprazolam	oligonol	-0.64 (-2.06; 0.77)	.
alprazolam	vardenafil	-0.67 (-2.01; 0.67)	.
alprazolam	cilostazol	-1.23 (-2.58; 0.12)	.
NOR-TOP	zinc	-0.06 (-1.22; 1.09)	.
NOR-TOP	carbamazepine	-0.06 (-1.47; 1.34)	.
NOR-TOP	ITDI	-0.11 (-1.28; 1.06)	.
NOR-TOP	melatonin	-0.11 (-1.35; 1.12)	.
NOR-TOP	betahistine	-0.17 (-1.49; 1.16)	.
NOR-TOP	neramexane	-0.17 (-1.43; 1.09)	.
NOR-TOP	paroxetine	-0.21 (-1.49; 1.07)	.
NOR-TOP	sertraline	-0.25 (-1.47; 0.97)	.
NOR-TOP	gabapentin	-0.23 (-1.33; 0.87)	.
NOR-TOP	CoQ10	-0.30 (-1.65; 1.05)	.
NOR-TOP	ondansetron	-0.29 (-1.62; 1.04)	.
NOR-TOP	VES-PAR	-0.35 (-1.70; 1.01)	.
NOR-TOP	VitB12	-0.39 (-1.67; 0.88)	.
NOR-TOP	vestipitant	-0.40 (-1.76; 0.96)	.
NOR-TOP	placebo	-0.35 (-1.31; 0.62)	-0.35 (-1.31; 0.62)
NOR-TOP	trazodone	-0.44 (-1.74; 0.86)	.
NOR-TOP	hangekobokuto	-0.50 (-1.81; 0.81)	.
NOR-TOP	EHLP	-0.47 (-1.64; 0.69)	.
NOR-TOP	alprazolam-ITDI	-0.72 (-2.33; 0.88)	.
NOR-TOP	oligonol	-0.68 (-2.12; 0.77)	.
NOR-TOP	vardenafil	-0.70 (-2.07; 0.67)	.
NOR-TOP	cilostazol	-1.26 (-2.65; 0.12)	.
zinc	carbamazepine	0.00 (-1.20; 1.20)	.
zinc	ITDI	-0.05 (-0.97; 0.87)	.
zinc	melatonin	-0.05 (-1.05; 0.94)	.
zinc	betahistine	-0.10 (-1.21; 1.01)	.
zinc	neramexane	-0.10 (-1.13; 0.92)	.
zinc	paroxetine	-0.15 (-1.20; 0.91)	.
zinc	sertraline	-0.19 (-1.17; 0.79)	.
zinc	gabapentin	-0.17 (-0.99; 0.65)	.
zinc	CoQ10	-0.23 (-1.37; 0.90)	.
zinc	ondansetron	-0.23 (-1.34; 0.89)	.
zinc	VES-PAR	-0.28 (-1.43; 0.86)	.
zinc	VitB12	-0.33 (-1.37; 0.72)	.
zinc	vestipitant	-0.33 (-1.48; 0.82)	.
zinc	placebo	-0.28 (-0.92; 0.36)	-0.28 (-0.92; 0.36)
zinc	trazodone	-0.38 (-1.46; 0.70)	.
zinc	hangekobokuto	-0.44 (-1.53; 0.65)	.
zinc	EHLP	-0.41 (-1.32; 0.50)	.
zinc	alprazolam-ITDI	-0.66 (-2.09; 0.77)	.
zinc	oligonol	-0.61 (-1.86; 0.64)	.
zinc	vardenafil	-0.64 (-1.80; 0.53)	.
zinc	cilostazol	-1.20 (-2.38; -0.02)	.
carbamazepine	ITDI	-0.05 (-1.27; 1.16)	.
carbamazepine	melatonin	-0.05 (-1.33; 1.22)	.
carbamazepine	betahistine	-0.10 (-1.47; 1.26)	.
carbamazepine	neramexane	-0.11 (-1.41; 1.19)	.
carbamazepine	paroxetine	-0.15 (-1.47; 1.17)	.
carbamazepine	sertraline	-0.19 (-1.45; 1.07)	.
carbamazepine	gabapentin	-0.17 (-1.31; 0.97)	.
carbamazepine	CoQ10	-0.24 (-1.62; 1.15)	.
carbamazepine	ondansetron	-0.23 (-1.60; 1.14)	.
carbamazepine	VES-PAR	-0.28 (-1.68; 1.11)	.
carbamazepine	VitB12	-0.33 (-1.64; 0.98)	.
carbamazepine	vestipitant	-0.33 (-1.73; 1.06)	.
carbamazepine	placebo	-0.28 (-1.30; 0.73)	-0.28 (-1.30; 0.73)
carbamazepine	trazodone	-0.38 (-1.72; 0.96)	.
carbamazepine	hangekobokuto	-0.44 (-1.79; 0.91)	.
carbamazepine	EHLP	-0.41 (-1.62; 0.80)	.
carbamazepine	alprazolam-ITDI	-0.66 (-2.30; 0.98)	.
carbamazepine	oligonol	-0.61 (-2.10; 0.87)	.
carbamazepine	vardenafil	-0.64 (-2.05; 0.77)	.
carbamazepine	cilostazol	-1.20 (-2.62; 0.22)	.
ITDI	melatonin	-0.00 (-1.01; 1.01)	.
ITDI	betahistine	-0.05 (-1.18; 1.07)	.
ITDI	neramexane	-0.06 (-1.10; 0.99)	.
ITDI	paroxetine	-0.10 (-1.17; 0.98)	.
ITDI	sertraline	-0.14 (-1.14; 0.86)	.
ITDI	gabapentin	-0.12 (-0.96; 0.72)	.
ITDI	CoQ10	-0.18 (-1.33; 0.97)	.
ITDI	ondansetron	-0.18 (-1.31; 0.95)	.
ITDI	VES-PAR	-0.23 (-1.39; 0.93)	.
ITDI	VitB12	-0.28 (-1.34; 0.78)	.
ITDI	vestipitant	-0.28 (-1.45; 0.88)	.
ITDI	placebo	-0.23 (-0.89; 0.43)	-0.23 (-0.89; 0.43)
ITDI	trazodone	-0.33 (-1.42; 0.77)	.
ITDI	hangekobokuto	-0.39 (-1.49; 0.72)	.
ITDI	EHLP	-0.36 (-1.28; 0.57)	.
ITDI	alprazolam-ITDI	-0.61 (-2.05; 0.84)	.
ITDI	oligonol	-0.56 (-1.83; 0.70)	.
ITDI	vardenafil	-0.59 (-1.77; 0.59)	.
ITDI	cilostazol	-1.15 (-2.34; 0.04)	.
melatonin	betahistine	-0.05 (-1.24; 1.14)	.
melatonin	neramexane	-0.05 (-1.17; 1.06)	.
melatonin	paroxetine	-0.10 (-1.24; 1.04)	.
melatonin	sertraline	-0.14 (-0.88; 0.60)	-0.33 (-1.22; 0.57)
melatonin	gabapentin	-0.12 (-1.04; 0.81)	.
melatonin	CoQ10	-0.18 (-1.40; 1.03)	.
melatonin	ondansetron	-0.18 (-1.37; 1.02)	.
melatonin	VES-PAR	-0.23 (-1.45; 0.99)	.
melatonin	VitB12	-0.28 (-1.41; 0.85)	.
melatonin	vestipitant	-0.28 (-1.51; 0.94)	.
melatonin	placebo	-0.23 (-1.00; 0.53)	-0.02 (-0.97; 0.94)
melatonin	trazodone	-0.33 (-1.49; 0.83)	.
melatonin	hangekobokuto	-0.39 (-1.56; 0.78)	.
melatonin	EHLP	-0.36 (-1.36; 0.65)	.
melatonin	alprazolam-ITDI	-0.61 (-2.10; 0.89)	.
melatonin	oligonol	-0.56 (-1.88; 0.76)	.
melatonin	vardenafil	-0.59 (-1.83; 0.65)	.
melatonin	cilostazol	-1.15 (-2.40; 0.10)	.
betahistine	neramexane	-0.00 (-1.22; 1.21)	.
betahistine	paroxetine	-0.05 (-1.29; 1.20)	.
betahistine	sertraline	-0.09 (-1.26; 1.09)	.
betahistine	gabapentin	-0.06 (-1.11; 0.98)	.
betahistine	CoQ10	-0.13 (-1.44; 1.18)	.
betahistine	ondansetron	-0.13 (-1.42; 1.16)	.
betahistine	VES-PAR	-0.18 (-1.50; 1.14)	.
betahistine	VitB12	-0.23 (-1.46; 1.01)	.
betahistine	vestipitant	-0.23 (-1.55; 1.09)	.
betahistine	placebo	-0.18 (-1.09; 0.73)	-0.18 (-1.09; 0.73)
betahistine	trazodone	-0.28 (-1.54; 0.99)	.
betahistine	hangekobokuto	-0.34 (-1.60; 0.93)	.
betahistine	EHLP	-0.30 (-1.42; 0.81)	.
betahistine	alprazolam-ITDI	-0.56 (-2.13; 1.02)	.
betahistine	oligonol	-0.51 (-1.92; 0.90)	.
betahistine	vardenafil	-0.54 (-1.87; 0.80)	.
betahistine	cilostazol	-1.10 (-2.44; 0.25)	.
neramexane	paroxetine	-0.04 (-1.21; 1.13)	.
neramexane	sertraline	-0.08 (-1.18; 1.02)	.
neramexane	gabapentin	-0.06 (-1.02; 0.90)	.
neramexane	CoQ10	-0.13 (-1.37; 1.11)	.
neramexane	ondansetron	-0.12 (-1.34; 1.10)	.
neramexane	VES-PAR	-0.18 (-1.42; 1.07)	.
neramexane	VitB12	-0.22 (-1.38; 0.94)	.
neramexane	vestipitant	-0.23 (-1.48; 1.02)	.
neramexane	placebo	-0.18 (-0.98; 0.63)	-0.18 (-0.98; 0.63)
neramexane	trazodone	-0.27 (-1.46; 0.92)	.
neramexane	hangekobokuto	-0.33 (-1.53; 0.87)	.
neramexane	EHLP	-0.30 (-1.34; 0.73)	.
neramexane	alprazolam-ITDI	-0.55 (-2.07; 0.96)	.
neramexane	oligonol	-0.51 (-1.85; 0.84)	.
neramexane	vardenafil	-0.53 (-1.80; 0.73)	.
neramexane	cilostazol	-1.09 (-2.37; 0.18)	.
paroxetine	sertraline	-0.04 (-1.17; 1.09)	.
paroxetine	gabapentin	-0.02 (-1.01; 0.97)	.
paroxetine	CoQ10	-0.09 (-1.35; 1.18)	.
paroxetine	ondansetron	-0.08 (-1.33; 1.16)	.
paroxetine	VES-PAR	-0.13 (-1.41; 1.14)	.
paroxetine	VitB12	-0.18 (-1.37; 1.00)	.
paroxetine	vestipitant	-0.19 (-1.46; 1.09)	.
paroxetine	placebo	-0.13 (-0.98; 0.71)	-0.13 (-0.98; 0.71)
paroxetine	trazodone	-0.23 (-1.45; 0.98)	.
paroxetine	hangekobokuto	-0.29 (-1.51; 0.93)	.
paroxetine	EHLP	-0.26 (-1.33; 0.81)	.
paroxetine	alprazolam-ITDI	-0.51 (-2.05; 1.03)	.
paroxetine	oligonol	-0.47 (-1.83; 0.90)	.
paroxetine	vardenafil	-0.49 (-1.78; 0.80)	.
paroxetine	cilostazol	-1.05 (-2.35; 0.25)	.
sertraline	gabapentin	0.02 (-0.89; 0.93)	.
sertraline	CoQ10	-0.04 (-1.25; 1.16)	.
sertraline	ondansetron	-0.04 (-1.22; 1.14)	.
sertraline	VES-PAR	-0.09 (-1.30; 1.12)	.
sertraline	VitB12	-0.14 (-1.26; 0.98)	.
sertraline	vestipitant	-0.14 (-1.36; 1.07)	.
sertraline	placebo	-0.09 (-0.84; 0.65)	-0.29 (-1.20; 0.62)
sertraline	trazodone	-0.19 (-1.34; 0.96)	.
sertraline	hangekobokuto	-0.25 (-1.41; 0.91)	.
sertraline	EHLP	-0.22 (-1.21; 0.77)	.
sertraline	alprazolam-ITDI	-0.47 (-1.95; 1.02)	.
sertraline	oligonol	-0.42 (-1.73; 0.89)	.
sertraline	vardenafil	-0.45 (-1.68; 0.78)	.
sertraline	cilostazol	-1.01 (-2.25; 0.23)	.
gabapentin	CoQ10	-0.07 (-1.14; 1.01)	.
gabapentin	ondansetron	-0.06 (-1.11; 0.99)	.
gabapentin	VES-PAR	-0.12 (-1.20; 0.97)	.
gabapentin	VitB12	-0.16 (-1.14; 0.82)	.
gabapentin	vestipitant	-0.17 (-1.25; 0.92)	.
gabapentin	placebo	-0.12 (-0.63; 0.40)	-0.12 (-0.63; 0.40)
gabapentin	trazodone	-0.21 (-1.23; 0.80)	.
gabapentin	hangekobokuto	-0.27 (-1.30; 0.75)	.
gabapentin	EHLP	-0.24 (-1.07; 0.59)	.
gabapentin	alprazolam-ITDI	-0.49 (-1.87; 0.89)	.
gabapentin	oligonol	-0.45 (-1.64; 0.75)	.
gabapentin	vardenafil	-0.47 (-1.58; 0.63)	.
gabapentin	cilostazol	-1.03 (-2.15; 0.08)	.
CoQ10	ondansetron	0.01 (-1.31; 1.32)	.
CoQ10	VES-PAR	-0.05 (-1.39; 1.29)	.
CoQ10	VitB12	-0.09 (-1.35; 1.16)	.
CoQ10	vestipitant	-0.10 (-1.44; 1.24)	.
CoQ10	placebo	-0.05 (-0.99; 0.89)	-0.05 (-0.99; 0.89)
CoQ10	trazodone	-0.14 (-1.43; 1.14)	.
CoQ10	hangekobokuto	-0.20 (-1.50; 1.09)	.
CoQ10	EHLP	-0.17 (-1.32; 0.97)	.
CoQ10	alprazolam-ITDI	-0.42 (-2.02; 1.17)	.
CoQ10	oligonol	-0.38 (-1.81; 1.05)	.
CoQ10	vardenafil	-0.40 (-1.76; 0.95)	.
CoQ10	cilostazol	-0.97 (-2.33; 0.40)	.
ondansetron	VES-PAR	-0.05 (-1.37; 1.27)	.
ondansetron	VitB12	-0.10 (-1.34; 1.14)	.
ondansetron	vestipitant	-0.10 (-1.43; 1.22)	.
ondansetron	placebo	-0.05 (-0.97; 0.86)	-0.05 (-0.97; 0.86)
ondansetron	trazodone	-0.15 (-1.41; 1.11)	.
ondansetron	hangekobokuto	-0.21 (-1.48; 1.06)	.
ondansetron	EHLP	-0.18 (-1.30; 0.94)	.
ondansetron	alprazolam-ITDI	-0.43 (-2.00; 1.15)	.
ondansetron	oligonol	-0.38 (-1.80; 1.03)	.
ondansetron	vardenafil	-0.41 (-1.75; 0.93)	.
ondansetron	cilostazol	-0.97 (-2.32; 0.38)	.
VES-PAR	VitB12	-0.05 (-1.31; 1.22)	.
VES-PAR	vestipitant	-0.05 (-1.00; 0.90)	-0.05 (-1.00; 0.90)
VES-PAR	placebo	0.00 (-0.95; 0.95)	-0.00 (-0.95; 0.95)
VES-PAR	trazodone	-0.10 (-1.39; 1.20)	.
VES-PAR	hangekobokuto	-0.16 (-1.46; 1.14)	.
VES-PAR	EHLP	-0.13 (-1.28; 1.03)	.
VES-PAR	alprazolam-ITDI	-0.38 (-1.97; 1.22)	.
VES-PAR	oligonol	-0.33 (-1.77; 1.11)	.
VES-PAR	vardenafil	-0.36 (-1.72; 1.01)	.
VES-PAR	cilostazol	-0.92 (-2.29; 0.46)	.
VitB12	vestipitant	-0.00 (-1.27; 1.26)	.
VitB12	placebo	0.05 (-0.78; 0.88)	0.05 (-0.78; 0.88)
VitB12	trazodone	-0.05 (-1.25; 1.15)	.
VitB12	hangekobokuto	-0.11 (-1.32; 1.10)	.
VitB12	EHLP	-0.08 (-1.13; 0.98)	.
VitB12	alprazolam-ITDI	-0.33 (-1.86; 1.20)	.
VitB12	oligonol	-0.28 (-1.64; 1.07)	.
VitB12	vardenafil	-0.31 (-1.59; 0.97)	.
VitB12	cilostazol	-0.87 (-2.16; 0.42)	.
vestipitant	placebo	0.05 (-0.91; 1.01)	0.05 (-0.91; 1.01)
vestipitant	trazodone	-0.05 (-1.34; 1.25)	.
vestipitant	hangekobokuto	-0.10 (-1.41; 1.20)	.
vestipitant	EHLP	-0.07 (-1.23; 1.08)	.
vestipitant	alprazolam-ITDI	-0.33 (-1.92; 1.27)	.
vestipitant	oligonol	-0.28 (-1.72; 1.16)	.
vestipitant	vardenafil	-0.31 (-1.67; 1.06)	.
vestipitant	cilostazol	-0.87 (-2.24; 0.51)	.
placebo	trazodone	-0.10 (-0.97; 0.78)	-0.10 (-0.97; 0.78)
placebo	hangekobokuto	-0.16 (-1.04; 0.73)	-0.16 (-1.04; 0.73)
placebo	EHLP	-0.13 (-0.78; 0.53)	-0.13 (-0.78; 0.53)
placebo	alprazolam-ITDI	-0.38 (-1.66; 0.91)	.
placebo	oligonol	-0.33 (-1.41; 0.75)	-0.33 (-1.41; 0.75)
placebo	vardenafil	-0.36 (-1.33; 0.62)	-0.36 (-1.33; 0.62)
placebo	cilostazol	-0.92 (-1.91; 0.07)	-0.92 (-1.91; 0.07)
trazodone	hangekobokuto	-0.06 (-1.30; 1.18)	.
trazodone	EHLP	-0.03 (-1.12; 1.06)	.
trazodone	alprazolam-ITDI	-0.28 (-1.83; 1.27)	.
trazodone	oligonol	-0.23 (-1.62; 1.15)	.
trazodone	vardenafil	-0.26 (-1.57; 1.05)	.
trazodone	cilostazol	-0.82 (-2.14; 0.50)	.
hangekobokuto	EHLP	0.03 (-1.07; 1.13)	.
hangekobokuto	alprazolam-ITDI	-0.22 (-1.78; 1.34)	.
hangekobokuto	oligonol	-0.17 (-1.57; 1.22)	.
hangekobokuto	vardenafil	-0.20 (-1.52; 1.12)	.
hangekobokuto	cilostazol	-0.76 (-2.09; 0.57)	.
EHLP	alprazolam-ITDI	-0.25 (-1.69; 1.19)	.
EHLP	oligonol	-0.21 (-1.46; 1.05)	.
EHLP	vardenafil	-0.23 (-1.40; 0.94)	.
EHLP	cilostazol	-0.79 (-1.98; 0.39)	.
alprazolam-ITDI	oligonol	0.05 (-1.63; 1.72)	.
alprazolam-ITDI	vardenafil	0.02 (-1.59; 1.63)	.
alprazolam-ITDI	cilostazol	-0.54 (-2.16; 1.08)	.
oligonol	vardenafil	-0.03 (-1.48; 1.43)	.
oligonol	cilostazol	-0.59 (-2.05; 0.87)	.
vardenafil	cilostazol	-0.56 (-1.95; 0.83)	.
The results of pairwise (upper-right section) and network (lower-left section) meta-analyses for improving tinnitus severity are displayed as standardized mean differences (SMDs) with 95% confidence intervals. Interventions are listed according to their SUCRA rankings. In pairwise meta-analyses, a negative SMD means the treatment in the row achieved greater improvement than the one in the column.…

## Sheet: S.Table5
Supplementary Table 5. SUCRA results for network meta-analysis.
treat	severity	annoyance	loudness	subgroup severity per-protocol	subgroup severity chronic	subgroup severity THI	subgroup low ROB
lipoic acid + Vit	0.678568				0.838333	0.765733	0.894889
acamprosate	0.685136	0.884091	0.872833	0.66396	0.832593	0.825967	0.867778
VER-PAR	0.508386			0.4464	0.615556		0.662222
NOR-TOP	0.509795			0.43728	0.589148		0.652889
neramexane	0.422477	0.522818	0.343056		0.447556	0.512467	0.535
paroxetine	0.397659				0.398519		0.463889
placebo	0.298977	0.265636	0.251889	0.20488	0.262815	0.3458	0.293667
zinc	0.481386	0.240455	0.498722	0.689	0.224741		0.243889
trazodone	0.290159			0.17016	0.22737		0.211778
hangekobokuto	0.265432	0.443364	0.369556		0.19563	0.257633	0.174
caroverine	0.944477					0.9978
gabapentin-lidocaine	0.748886				0.890333	0.883367
piribedil	0.675864	0.423818		0.63356	0.828111	0.8399
Neurotec	0.655886	0.863909	0.626222	0.6372		0.839133
pramipexole	0.655205			0.59224	0.77563	0.785533
misprost	0.573955			0.50668		0.726667
ALP-ITDI-LPE	0.554136					0.700467
sulodexide	0.508909			0.43832	0.608	0.649267
alprazolam	0.491932			0.41404	0.559741	0.6178
ITDI	0.44025	0.653909	0.427778		0.628667	0.6099
betahistine	0.439523				0.440037	0.505
ITDI-melatonin	0.524977					0.4872
gabapentin	0.373568			0.19524	0.34963	0.4276
CoQ10	0.357909		0.318056		0.333815	0.4173
ondansetron	0.364977		0.438944		0.350889	0.415633
melatonin	0.447295			0.3848	0.758222	0.3896
GB	0.7505			0.91724		0.377767
VES-PAR	0.340091		0.439556			0.363233
vestipitant	0.314114		0.309889			0.339333
VitB12	0.311932					0.314467
EHLP	0.257886	0.339091	0.470611	0.1474	0.280556	0.262533
clonazepam	0.616205			0.86584		0.253467
sertraline	0.368477	0.801455	0.491167	0.27084	0.546148	0.203167
oligonol	0.206432			0.10696		0.187333
alprazolam-ITDI	0.215909					0.173967
cilostazol	0.05425		0.452889	0.00916	0.0108889	0.0249667
EHLP-GAB		0.557364	0.618056
lamotrigine		0.00409091	0.105167
GB-Vit	0.997682			0.99984
lidocaine	0.767409			0.73208
amitriptyline	0.767			0.7426
pentoxifylline	0.756409
deanxit-clonazepam	0.678045			0.89512
nortriptyline	0.585205				0.710407
oxcarbazepine	0.552545			0.50284	0.650815
carbamazepine	0.472477			0.39632	0.531111
vardenafil	0.191705				0.114741
fluoxetine			0.999667
oxytocin			0.876167
ALP-FLU			0.589778
SUCRA: the surface under the curve cumulative ranking probabilities; GB: Ginkgo biloba; Vit: vitamin: ALP-ITDI-LPE: alprazolam+intratympanic dexamethasone+lipo-prostaglandin E1; NOR-TOP: nortriptyline-topiramate; GAB: gabapentin; VER-PAR: verapamil-paroxetine; VES-PAR: vestipitant+paroxetine; EHLP: enzymolyzed honeybee larvae; FLU: fluoxetine; CoQ10: coenzyme Q10; Vit: vitamin.

## Sheet: S.Table6
Supplementary Table 6. Heterogeneity parameter I2 and tau2 for network meta-analysis.
outcomes	I2	tau2
severity	0.67 (0.33, 0.84)	0.15
annoyance	0 (0, 0.9)	0
loudness	0.63 (0, 0.89)	0.15
subgroup severity per-protocol	0 (0, 0.85)	0
subgroup severity chronic	0.22 (0, 0.92)	0.02
subgroup severity THI	0.1 (0, 0.77)	0.01
subgroup low ROB	NA (NA, NA)
ROB: risk of bias; THI: tinnitus handicap inventory.

## Sheet: S.Table7
Supplementary Table 7. Q statistics for network meta-analysis.
category	parameter	value	data_category
total	Q	24.14	severity
within design (hetero)	Q	6.63	severity
between design (inconsis)	Q	17.51	severity
total	d.f.	8	severity
within design (hetero)	d.f.	4	severity
between design (inconsis)	d.f.	4	severity
total	p.value	<0.01	severity
within design (hetero)	p.value	0.16	severity
between design (inconsis)	p.value	<0.01	severity
total	Q	1.96	annoyance
within design (hetero)	Q	1.92	annoyance
between design (inconsis)	Q	0.04	annoyance
total	d.f.	2	annoyance
within design (hetero)	d.f.	1	annoyance
between design (inconsis)	d.f.	1	annoyance
total	p.value	0.38	annoyance
within design (hetero)	p.value	0.17	annoyance
between design (inconsis)	p.value	0.84	annoyance
total	Q	5.36	loudness
within design (hetero)	Q	3.98	loudness
between design (inconsis)	Q	1.38	loudness
total	d.f.	2	loudness
within design (hetero)	d.f.	1	loudness
between design (inconsis)	d.f.	1	loudness
total	p.value	0.07	loudness
within design (hetero)	p.value	0.05	loudness
between design (inconsis)	p.value	0.24	loudness
total	Q	2.09	subgroup severity per-protocol
within design (hetero)	Q	0.41	subgroup severity per-protocol
between design (inconsis)	Q	1.69	subgroup severity per-protocol
total	d.f.	3	subgroup severity per-protocol
within design (hetero)	d.f.	2	subgroup severity per-protocol
between design (inconsis)	d.f.	1	subgroup severity per-protocol
total	p.value	0.55	subgroup severity per-protocol
within design (hetero)	p.value	0.82	subgroup severity per-protocol
between design (inconsis)	p.value	0.19	subgroup severity per-protocol
total	Q	2.56	subgroup severity chronic
within design (hetero)	Q	0.12	subgroup severity chronic
between design (inconsis)	Q	2.45	subgroup severity chronic
total	d.f.	2	subgroup severity chronic
within design (hetero)	d.f.	1	subgroup severity chronic
between design (inconsis)	d.f.	1	subgroup severity chronic
total	p.value	0.28	subgroup severity chronic
within design (hetero)	p.value	0.73	subgroup severity chronic
between design (inconsis)	p.value	0.12	subgroup severity chronic
total	Q	5.58	subgroup severity THI
within design (hetero)	Q	1.31	subgroup severity THI
between design (inconsis)	Q	4.26	subgroup severity THI
total	d.f.	5	subgroup severity THI
within design (hetero)	d.f.	3	subgroup severity THI
between design (inconsis)	d.f.	2	subgroup severity THI
total	p.value	0.35	subgroup severity THI
within design (hetero)	p.value	0.73	subgroup severity THI
between design (inconsis)	p.value	0.12	subgroup severity THI
total	Q	0	subgroup low ROB
within design (hetero)	Q	0	subgroup low ROB
between design (inconsis)	Q	0	subgroup low ROB
total	d.f.	0	subgroup low ROB
within design (hetero)	d.f.	0	subgroup low ROB
between design (inconsis)	d.f.	0	subgroup low ROB
total	p.value		subgroup low ROB
within design (hetero)	p.value		subgroup low ROB
between design (inconsis)	p.value		subgroup low ROB
THI: tinnitus handicap inventory; ROB: risk of bias; d.f.: degree of freedom

## Sheet: S.Table8
Supplementary Table 8. Node-splitting analysis and GRADE assessments for network meta-analysis.
outcomes	comparison	k	study	quality	prop	nma	direct	indirect	compare	pval	GRADE assessment
severity	gabapentin vs gabapentin-lidocaine	1	Chauhan B	High risk	0.8324	0.7484 (-0.1214,1.6182)	0.5685 (-0.3848,1.5219)	1.6415 (-0.4829,3.7659)	-1.0729 (-3.4014,1.2556)	0.3665	⨁⨁◯◯
severity	gabapentin-lidocaine vs placebo	1	Polanski J	High risk	0.8203	-0.8636 (-1.737,0.0097)	-1.052 (-2.0163,-0.0877)	-0.0039 (-2.0641,2.0563)	-1.0481 (-3.3228,1.2266)	0.3665	⨁⨁◯◯
severity	GB vs GB-Vit	1	Chauhan B & Polanski J	High risk & High risk	0.9373	2.2896 (1.3132,3.266)	1.9862 (0.9777,2.9947)	6.827 (2.927,10.727)	-4.8408 (-8.8691,-0.8126)	0.0185	⨁◯◯◯
severity	GB vs lipoic acid + Vit	1	Chauhan B	High risk	0.5999	-0.1547 (-1.0036,0.6942)	0.3262 (-0.7697,1.4222)	-0.8759 (-2.218,0.4662)	1.2021 (-0.5306,2.9349)	0.1739	⨁⨁◯◯
severity	GB vs placebo	2	Ciodaro F	High risk	0.9295	-0.8167 (-1.5268,-0.1066)	-0.7993 (-1.5358,-0.0627)	-1.046 (-3.7199,1.6279)	0.2467 (-2.5268,3.0202)	0.8616	⨁⨁◯◯
severity	GB-Vit vs placebo	1	Ciodaro F	High risk	0.8464	-3.1063 (-4.1515,-2.061)	-3.6413 (-4.7775,-2.5052)	-0.1574 (-2.8246,2.5099)	-3.484 (-6.3831,-0.5848)	0.0185	⨁◯◯◯
severity	lipoic acid + Vit vs placebo	2	Petridou A & Polanski J	Low risk & High risk	0.9408	-0.662 (-1.3341,0.0102)	-0.4593 (-1.1522,0.2337)	-3.8807 (-6.6422,-1.1192)	3.4214 (0.5743,6.2685)	0.0185	⨁◯◯◯
severity	melatonin vs placebo	1	Rosenberg S	Some concerns	0.6408	-0.2304 (-0.9958,0.535)	-0.0169 (-0.973,0.9393)	-0.6112 (-1.8882,0.6658)	0.5944 (-1.0009,2.1896)	0.4652	⨁⨁◯◯
severity	melatonin vs sertraline	1	Abtahi S	Some concerns	0.6846	-0.1377 (-0.8789,0.6036)	-0.3251 (-1.221,0.5708)	0.2692 (-1.0507,1.5892)	-0.5944 (-2.1896,1.0009)	0.4652	⨁⨁◯◯
severity	sertraline vs placebo	1	Zoger S	Some concerns	0.6746	-0.0927 (-0.8401,0.6547)	-0.2861 (-1.1961,0.6239)	0.3082 (-1.002,1.6185)	-0.5944 (-2.1896,1.0009)	0.4652	⨁⨁◯◯
annoyance	EHLP vs EHLP-GAB	1	Ohkuma A	Low risk	0.8283	0.276 (-0.5065,1.0585)	0.3116 (-0.5482,1.1714)	0.1042 (-1.784,1.9924)	0.2074 (-1.8674,2.2821)	0.8447	⨁⨁◯◯
annoyance	EHLP-GAB vs placebo	1	Ohkuma A	Low risk	0.8291	-0.3167 (-1.099,0.4656)	-0.2812 (-1.1403,0.5779)	-0.4889 (-2.3811,1.4033)	0.2077 (-1.8704,2.2859)	0.8447	⨁⨁◯◯
loudness	EHLP vs EHLP-GAB	1	Ohkuma A	Low risk	0.8586	0.323 (-0.7439,1.3899)	0.1478 (-1.0036,1.2992)	1.3865 (-1.4507,4.2236)	-1.2386 (-4.3005,1.8232)	0.4279	⨁⨁◯◯
loudness	EHLP-GAB vs placebo	1	Ohkuma A	Low risk	0.8445	-0.657 (-1.7315,0.4175)	-0.8435 (-2.0128,0.3257)	0.356 (-2.369,3.081)	-1.1996 (-4.1648,1.7657)	0.4279	⨁⨁◯◯
The results of node-splitting analysis with comparisons in both direct and indirect evidence. The p value is based on the test for disagreement (direct versus indirect). k: number of studies providing direct evidence; nma: network meta-analysis; GB: Ginkgo biloba; Vit: vitamin; EHLP: enzymolyzed honeybee larvae, GAB: gabapentin.

## Sheet: S.Table9
Supplementary Table 9. League table for annoyance network meta-analysis.
	acamprosate	Neurotec	sertraline	ITDI	EHLP-GAB	neramexane	hangekobokuto	piribedil	EHLP	placebo	zinc	lamotrigine
acamprosate	acamprosate	.	.	.	.	.	.	.	.	-0.88 (-1.81; 0.04)	.	.
Neurotec	-0.19 (-1.20; 0.81)	Neurotec	.	.	.	.	.	.	.	-0.69 (-1.09; -0.29)	.	.
sertraline	-0.31 (-1.29; 0.68)	-0.11 (-0.64; 0.41)	sertraline	.	.	.	.	.	.	-0.58 (-0.92; -0.24)	.	.
ITDI	-0.48 (-1.55; 0.59)	-0.29 (-0.96; 0.38)	-0.18 (-0.81; 0.46)	ITDI	.	.	.	.	.	-0.40 (-0.94; 0.14)	.	.
EHLP-GAB	-0.57 (-1.78; 0.64)	-0.37 (-1.25; 0.50)	-0.26 (-1.11; 0.59)	-0.09 (-1.03; 0.86)	EHLP-GAB	.	.	.	-0.31 (-1.17; 0.55)	-0.28 (-1.14; 0.58)	.	.
neramexane	-0.65 (-1.61; 0.31)	-0.46 (-0.94; 0.02)	-0.34 (-0.78; 0.09)	-0.17 (-0.77; 0.43)	-0.08 (-0.91; 0.74)	neramexane	.	.	.	-0.23 (-0.50; 0.03)	.	.
hangekobokuto	-0.74 (-1.76; 0.29)	-0.54 (-1.14; 0.06)	-0.43 (-0.99; 0.14)	-0.25 (-0.95; 0.45)	-0.17 (-1.07; 0.73)	-0.08 (-0.61; 0.44)	hangekobokuto	.	.	-0.15 (-0.60; 0.30)	.	.
piribedil	-0.75 (-1.74; 0.25)	-0.56 (-1.10; -0.01)	-0.44 (-0.95; 0.06)	-0.27 (-0.92; 0.39)	-0.18 (-1.05; 0.68)	-0.10 (-0.55; 0.36)	-0.01 (-0.60; 0.57)	piribedil	.	-0.14 (-0.51; 0.24)	.	.
EHLP	-0.84 (-1.87; 0.18)	-0.65 (-1.24; -0.06)	-0.54 (-1.09; 0.02)	-0.36 (-1.06; 0.33)	-0.28 (-1.06; 0.51)	-0.19 (-0.71; 0.32)	-0.11 (-0.74; 0.52)	-0.09 (-0.67; 0.48)	EHLP	-0.04 (-0.48; 0.40)	.	.
placebo	-0.88 (-1.81; 0.04)	-0.69 (-1.09; -0.29)	-0.58 (-0.92; -0.24)	-0.40 (-0.94; 0.14)	-0.32 (-1.10; 0.47)	-0.23 (-0.50; 0.03)	-0.15 (-0.60; 0.30)	-0.14 (-0.51; 0.24)	-0.04 (-0.48; 0.40)	placebo	-0.04 (-0.33; 0.25)	-0.75 (-1.26; -0.23)
zinc	-0.92 (-1.89; 0.04)	-0.73 (-1.22; -0.24)	-0.62 (-1.06; -0.17)	-0.44 (-1.05; 0.17)	-0.36 (-1.19; 0.48)	-0.27 (-0.66; 0.12)	-0.19 (-0.72; 0.35)	-0.18 (-0.64; 0.29)	-0.08 (-0.60; 0.44)	-0.04 (-0.33; 0.25)	zinc	.
lamotrigine	-1.63 (-2.69; -0.58)	-1.44 (-2.09; -0.79)	-1.32 (-1.94; -0.71)	-1.15 (-1.89; -0.40)	-1.06 (-2.00; -0.13)	-0.98 (-1.56; -0.40)	-0.90 (-1.58; -0.21)	-0.88 (-1.52; -0.25)	-0.79 (-1.46; -0.11)	-0.75 (-1.26; -0.23)	-0.71 (-1.30; -0.12)	lamotrigine
The results of pairwise (upper-right section) and network (lower-left section) meta-analyses for improving tinnitus annoyance are displayed as standardized mean differences (SMDs) with 95% confidence intervals. Interventions are listed according to their SUCRA rankings. In pairwise meta-analyses, a negative SMD means the treatment in the row achieved greater improvement than the one in the column…

## Sheet: S.Table10
Supplementary Table 10. League table for loudness network meta-analysis.
	fluoxetine	oxytocin	acamprosate	Neurotec	EHLP-GAB	ALP-FLU	zinc	EHLP	sertraline	VES-PAR	cilostazol	ondansetron	ITDI	hangekobokuto	neramexane	CoQ10	vestipitant	placebo	lamotrigine
fluoxetine	fluoxetine	.	.	.	.	-2.71 (-3.63; -1.79)	.	.	.	.	.	.	.	.	.	.	.	-3.28 (-4.23; -2.34)	.
oxytocin	-1.79 (-3.24; -0.34)	oxytocin	.	.	.	.	.	.	.	.	.	.	.	.	.	.	.	-1.50 (-2.59; -0.40)	.
acamprosate	-1.89 (-3.21; -0.58)	-0.11 (-1.53; 1.32)	acamprosate	.	.	.	.	.	.	.	.	.	.	.	.	.	.	-1.39 (-2.30; -0.48)	.
Neurotec	-2.66 (-3.94; -1.38)	-0.87 (-2.27; 0.53)	-0.76 (-2.02; 0.49)	Neurotec	.	.	.	.	.	.	.	.	.	.	.	.	.	-0.63 (-1.49; 0.24)	.
EHLP-GAB	-2.63 (-4.06; -1.20)	-0.84 (-2.37; 0.70)	-0.73 (-2.14; 0.68)	0.03 (-1.35; 1.41)	EHLP-GAB	.	.	-0.15 (-1.30; 1.00)	.	.	.	.	.	.	.	.	.	-0.84 (-2.01; 0.33)	.
ALP-FLU	-2.71 (-3.63; -1.79)	-0.92 (-2.32; 0.48)	-0.82 (-2.07; 0.44)	-0.05 (-1.28; 1.17)	-0.08 (-1.47; 1.30)	ALP-FLU	.	.	.	.	.	.	.	.	.	.	.	-0.57 (-1.44; 0.30)	.
zinc	-2.93 (-4.07; -1.79)	-1.14 (-2.41; 0.13)	-1.03 (-2.15; 0.08)	-0.27 (-1.35; 0.80)	-0.30 (-1.55; 0.95)	-0.22 (-1.30; 0.86)	zinc	.	.	.	.	.	.	.	.	.	.	-0.35 (-0.99; 0.29)	.
EHLP	-2.95 (-4.14; -1.76)	-1.16 (-2.47; 0.15)	-1.05 (-2.22; 0.11)	-0.29 (-1.42; 0.83)	-0.32 (-1.39; 0.74)	-0.24 (-1.37; 0.89)	-0.02 (-0.98; 0.94)	EHLP	.	.	.	.	.	.	.	.	.	-0.33 (-1.05; 0.39)	.
sertraline	-2.92 (-4.24; -1.61)	-1.13 (-2.56; 0.30)	-1.03 (-2.32; 0.26)	-0.26 (-1.52; 1.00)	-0.30 (-1.71; 1.12)	-0.21 (-1.48; 1.05)	0.01 (-1.11; 1.13)	0.03 (-1.14; 1.19)	sertraline	.	.	.	.	.	.	.	.	-0.36 (-1.28; 0.56)	.
VES-PAR	-3.02 (-4.37; -1.68)	-1.24 (-2.69; 0.22)	-1.13 (-2.45; 0.19)	-0.37 (-1.66; 0.92)	-0.40 (-1.84; 1.04)	-0.31 (-1.61; 0.98)	-0.10 (-1.25; 1.06)	-0.08 (-1.28; 1.12)	-0.10 (-1.43; 1.22)	VES-PAR	.	.	.	.	.	.	-0.22 (-1.18; 0.74)	-0.26 (-1.22; 0.70)	.
cilostazol	-2.99 (-4.42; -1.55)	-1.20 (-2.74; 0.34)	-1.09 (-2.51; 0.32)	-0.33 (-1.71; 1.05)	-0.36 (-1.88; 1.16)	-0.28 (-1.66; 1.11)	-0.06 (-1.31; 1.20)	-0.04 (-1.34; 1.26)	-0.07 (-1.48; 1.35)	0.04 (-1.41; 1.48)	cilostazol	.	.	.	.	.	.	-0.30 (-1.38; 0.78)	.
ondansetron	-3.03 (-4.35; -1.71)	-1.24 (-2.68; 0.19)	-1.14 (-2.43; 0.16)	-0.38 (-1.64; 0.89)	-0.41 (-1.82; 1.01)	-0.32 (-1.59; 0.94)	-0.10 (-1.23; 1.02)	-0.08 (-1.25; 1.09)	-0.11 (-1.41; 1.19)	-0.01 (-1.34; 1.32)	-0.05 (-1.47; 1.37)	ondansetron	.	.	.	.	.	-0.25 (-1.17; 0.67)	.
ITDI	-3.02 (-4.35; -1.69)	-1.23 (-2.67; 0.22)	-1.12 (-2.43; 0.19)	-0.36 (-1.63; 0.92)	-0.39 (-1.82; 1.04)	-0.31 (-1.58; 0.97)	-0.09 (-1.22; 1.05)	-0.07 (-1.25; 1.12)	-0.09 (-1.40; 1.22)	0.01 (-1.33; 1.35)	-0.03 (-1.46; 1.40)	0.02 (-1.30; 1.33)	ITDI	.	.	.	.	-0.27 (-1.20; 0.67)	.
hangekobokuto	-3.14 (-4.44; -1.84)	-1.35 (-2.77; 0.06)	-1.25 (-2.52; 0.03)	-0.48 (-1.72; 0.76)	-0.51 (-1.91; 0.88)	-0.43 (-1.67; 0.81)	-0.21 (-1.31; 0.89)	-0.19 (-1.34; 0.95)	-0.22 (-1.50; 1.06)	-0.12 (-1.42; 1.19)	-0.15 (-1.55; 1.25)	-0.11 (-1.39; 1.17)	-0.12 (-1.42; 1.17)	hangekobokuto	.	.	.	-0.14 (-1.03; 0.75)	.
neramexane	-3.17 (-4.42; -1.93)	-1.39 (-2.75; -0.02)	-1.28 (-2.50; -0.06)	-0.52 (-1.70; 0.67)	-0.55 (-1.90; 0.80)	-0.46 (-1.66; 0.73)	-0.25 (-1.28; 0.79)	-0.23 (-1.31; 0.86)	-0.25 (-1.48; 0.97)	-0.15 (-1.41; 1.11)	-0.19 (-1.54; 1.16)	-0.14 (-1.37; 1.09)	-0.16 (-1.40; 1.08)	-0.03 (-1.24; 1.17)	neramexane	.	.	-0.11 (-0.92; 0.71)	.
CoQ10	-3.26 (-4.60; -1.92)	-1.47 (-2.92; -0.02)	-1.37 (-2.68; -0.05)	-0.60 (-1.89; 0.68)	-0.63 (-2.07; 0.80)	-0.55 (-1.84; 0.74)	-0.33 (-1.47; 0.81)	-0.31 (-1.50; 0.88)	-0.34 (-1.66; 0.98)	-0.24 (-1.58; 1.11)	-0.27 (-1.71; 1.16)	-0.23 (-1.55; 1.09)	-0.24 (-1.58; 1.09)	-0.12 (-1.42; 1.18)	-0.08 (-1.33; 1.16)	CoQ10	.	-0.02 (-0.97; 0.92)	.
vestipitant	-3.25 (-4.60; -1.90)	-1.46 (-2.92; 0.00)	-1.35 (-2.68; -0.03)	-0.59 (-1.88; 0.70)	-0.62 (-2.06; 0.82)	-0.54 (-1.83; 0.76)	-0.32 (-1.47; 0.84)	-0.30 (-1.50; 0.90)	-0.33 (-1.65; 1.00)	-0.22 (-1.18; 0.74)	-0.26 (-1.71; 1.19)	-0.22 (-1.55; 1.12)	-0.23 (-1.57; 1.11)	-0.11 (-1.42; 1.20)	-0.07 (-1.33; 1.19)	0.01 (-1.34; 1.36)	vestipitant	-0.04 (-1.00; 0.93)	.
placebo	-3.28 (-4.23; -2.34)	-1.50 (-2.59; -0.40)	-1.39 (-2.30; -0.48)	-0.63 (-1.49; 0.24)	-0.66 (-1.73; 0.42)	-0.57 (-1.44; 0.30)	-0.35 (-0.99; 0.29)	-0.33 (-1.05; 0.39)	-0.36 (-1.28; 0.56)	-0.26 (-1.22; 0.70)	-0.30 (-1.38; 0.78)	-0.25 (-1.17; 0.67)	-0.27 (-1.20; 0.67)	-0.14 (-1.03; 0.75)	-0.11 (-0.92; 0.71)	-0.02 (-0.97; 0.92)	-0.04 (-1.00; 0.93)	placebo	-0.49 (-1.41; 0.43)
lamotrigine	-3.77 (-5.09; -2.45)	-1.98 (-3.42; -0.55)	-1.88 (-3.17; -0.58)	-1.11 (-2.38; 0.15)	-1.15 (-2.56; 0.27)	-1.06 (-2.33; 0.20)	-0.84 (-1.96; 0.28)	-0.82 (-1.99; 0.35)	-0.85 (-2.15; 0.45)	-0.75 (-2.08; 0.58)	-0.78 (-2.20; 0.63)	-0.74 (-2.04; 0.56)	-0.76 (-2.07; 0.56)	-0.63 (-1.91; 0.65)	-0.60 (-1.82; 0.63)	-0.51 (-1.83; 0.81)	-0.52 (-1.85; 0.81)	-0.49 (-1.41; 0.43)	lamotrigine
The results of pairwise (upper-right section) and network (lower-left section) meta-analyses for improving tinnitus loudness are displayed as standardized mean differences (SMDs) with 95% confidence intervals. Interventions are listed according to their SUCRA rankings. In pairwise meta-analyses, a negative SMD means the treatment in the row achieved greater improvement than the one in the column.…

## Sheet: S.Table11
Supplementary Table 11. SUCRA scores for leave-one-out analysis results.
excluded study	treatment	SUCRA score
AokiM2012	acamprosate	0.699182
AokiM2012	ALP-ITDI-LPE	0.548205
AokiM2012	alprazolam	0.496295
AokiM2012	alprazolam-ITDI	0.228773
AokiM2012	amitriptyline	0.753227
AokiM2012	betahistine	0.420409
AokiM2012	carbamazepine	0.483545
AokiM2012	caroverine	0.936068
AokiM2012	cilostazol	0.0602955
AokiM2012	clonazepam	0.605159
AokiM2012	CoQ10	0.372727
AokiM2012	deanxit-clonazepam	0.662636
AokiM2012	EHLP	0.255045
AokiM2012	gabapentin	0.389159
AokiM2012	gabapentin-lidocaine	0.732636
AokiM2012	GB	0.74125
AokiM2012	GB-Vit	0.996909
AokiM2012	hangekobokuto	0.274614
AokiM2012	ITDI	0.443591
AokiM2012	ITDI-melatonin	0.529068
AokiM2012	lidocaine	0.736364
AokiM2012	lipoic acid + Vit	0.675568
AokiM2012	melatonin	0.439364
AokiM2012	misprost	0.565227
AokiM2012	neramexane	0.425523
AokiM2012	Neurotec	0.656182
AokiM2012	NOR-TOP	0.505818
AokiM2012	nortriptyline	0.586364
AokiM2012	oligonol	0.218636
AokiM2012	ondansetron	0.380977
AokiM2012	oxcarbazepine	0.543841
AokiM2012	paroxetine	0.395477
AokiM2012	pentoxifylline	0.742341
AokiM2012	piribedil	0.665773
AokiM2012	placebo	0.304205
AokiM2012	pramipexole	0.636545
AokiM2012	sertraline	0.384023
AokiM2012	sulodexide	0.508591
AokiM2012	trazodone	0.297795
AokiM2012	vardenafil	0.200159
AokiM2012	VER-PAR	0.517091
AokiM2012	VES-PAR	0.353318
AokiM2012	vestipitant	0.327455
AokiM2012	VitB12	0.320273
AokiM2012	zinc	0.484295
AokiM2015	acamprosate	0.693295
AokiM2015	ALP-ITDI-LPE	0.571318
AokiM2015	alprazolam	0.495773
AokiM2015	alprazolam-ITDI	0.222977
AokiM2015	amitriptyline	0.742636
AokiM2015	betahistine	0.421773
AokiM2015	carbamazepine	0.477
AokiM2015	caroverine	0.940568
AokiM2015	cilostazol	0.0659545
AokiM2015	clonazepam	0.596341
AokiM2015	CoQ10	0.365659
AokiM2015	deanxit-clonazepam	0.659795
AokiM2015	EHLP	0.337
AokiM2015	gabapentin	0.371773
AokiM2015	gabapentin-lidocaine	0.735568
AokiM2015	GB	0.739318
AokiM2015	GB-Vit	0.996477
AokiM2015	hangekobokuto	0.284477
AokiM2015	ITDI	0.443318
AokiM2015	ITDI-melatonin	0.514841
AokiM2015	lidocaine	0.749182
AokiM2015	lipoic acid + Vit	0.67075
AokiM2015	melatonin	0.447614
AokiM2015	misprost	0.569455
AokiM2015	neramexane	0.431636
AokiM2015	Neurotec	0.654045
AokiM2015	NOR-TOP	0.503773
AokiM2015	nortriptyline	0.568295
AokiM2015	oligonol	0.219841
AokiM2015	ondansetron	0.3585
AokiM2015	oxcarbazepine	0.567614
AokiM2015	paroxetine	0.387023
AokiM2015	pentoxifylline	0.745205
AokiM2015	piribedil	0.66
AokiM2015	placebo	0.303341
AokiM2015	pramipexole	0.631795
AokiM2015	sertraline	0.375682
AokiM2015	sulodexide	0.516045
AokiM2015	trazodone	0.287614
AokiM2015	vardenafil	0.196318
AokiM2015	VER-PAR	0.516705
AokiM2015	VES-PAR	0.344955
AokiM2015	vestipitant	0.320182
AokiM2015	VitB12	0.316955
AokiM2015	zinc	0.481614
AzevedoA2009	acamprosate	0.72093
AzevedoA2009	ALP-ITDI-LPE	0.550884
AzevedoA2009	alprazolam	0.497372
AzevedoA2009	alprazolam-ITDI	0.210744
AzevedoA2009	amitriptyline	0.75707
AzevedoA2009	betahistine	0.434279
AzevedoA2009	carbamazepine	0.477698
AzevedoA2009	caroverine	0.942907
AzevedoA2009	cilostazol	0.0572558
AzevedoA2009	clonazepam	0.627977
AzevedoA2009	CoQ10	0.363628
AzevedoA2009	deanxit-clonazepam	0.679186
AzevedoA2009	EHLP	0.254256
AzevedoA2009	gabapentin	0.37593
AzevedoA2009	gabapentin-lidocaine	0.746209
AzevedoA2009	GB	0.752628
AzevedoA2009	GB-Vit	0.997419
AzevedoA2009	hangekobokuto	0.263326
AzevedoA2009	ITDI	0.450488
AzevedoA2009	ITDI-melatonin	0.530884
AzevedoA2009	lidocaine	0.764535
AzevedoA2009	lipoic acid + Vit	0.684349
AzevedoA2009	melatonin	0.448419
AzevedoA2009	misprost	0.570047
AzevedoA2009	neramexane	0.420698
AzevedoA2009	Neurotec	0.673465
AzevedoA2009	NOR-TOP	0.525023
AzevedoA2009	nortriptyline	0.58807
AzevedoA2009	oligonol	0.221209
AzevedoA2009	ondansetron	0.369628
AzevedoA2009	oxcarbazepine	0.560023
AzevedoA2009	paroxetine	0.406279
AzevedoA2009	pentoxifylline	0.77107
AzevedoA2009	piribedil	NA
AzevedoA2009	placebo	0.303907
AzevedoA2009	pramipexole	0.651349
AzevedoA2009	sertraline	0.376651
AzevedoA2009	sulodexide	0.517744
AzevedoA2009	trazodone	0.292395
AzevedoA2009	vardenafil	0.199419
AzevedoA2009	VER-PAR	0.515023
AzevedoA2009	VES-PAR	0.339395
AzevedoA2009	vestipitant	0.320302
AzevedoA2009	VitB12	0.308814
AzevedoA2009	zinc	0.481116
BeainoM	acamprosate	0.691884
BeainoM	ALP-ITDI-LPE	0.56386
BeainoM	alprazolam	0.499279
BeainoM	alprazolam-ITDI	0.208767
BeainoM	amitriptyline	0.765953
BeainoM	betahistine	0.427326
BeainoM	carbamazepine	0.493884
BeainoM	caroverine	0.946651
BeainoM	cilostazol	0.0549302
BeainoM	clonazepam	0.621907
BeainoM	CoQ10	0.357
BeainoM	deanxit-clonazepam	0.671651
BeainoM	EHLP	0.262907
BeainoM	gabapentin	0.374814
BeainoM	gabapentin-lidocaine	0.737907
BeainoM	GB	0.745907
BeainoM	GB-Vit	0.99786
BeainoM	hangekobokuto	0.258372
BeainoM	ITDI	0.459023
BeainoM	ITDI-melatonin	0.53986
BeainoM	lidocaine	0.757093
BeainoM	lipoic acid + Vit	0.678395
BeainoM	melatonin	0.445628
BeainoM	misprost	0.56086
BeainoM	neramexane	0.429326
BeainoM	Neurotec	0.678233
BeainoM	NOR-TOP	0.524093
BeainoM	nortriptyline	0.575442
BeainoM	oligonol	0.202233
BeainoM	ondansetron	0.368488
BeainoM	oxcarbazepine	0.54714
BeainoM	paroxetine	0.395884
BeainoM	pentoxifylline	0.743907
BeainoM	piribedil	0.667488
BeainoM	placebo	0.297814
BeainoM	pramipexole	0.633837
BeainoM	sertraline	0.370395
BeainoM	sulodexide	NA
BeainoM	trazodone	0.285279
BeainoM	vardenafil	0.185023
BeainoM	VER-PAR	0.515628
BeainoM	VES-PAR	0.337419
BeainoM	vestipitant	0.327767
BeainoM	VitB12	0.306558
BeainoM	zinc	0.486326
CastilhoL	acamprosate	0.734119
CastilhoL	ALP-ITDI-LPE	0.570429
CastilhoL	alprazolam	0.507119
CastilhoL	alprazolam-ITDI	0.210071
CastilhoL	amitriptyline	0.781643
CastilhoL	betahistine	NA
CastilhoL	carbamazepine	0.473
CastilhoL	caroverine	NA
CastilhoL	cilostazol	0.0526429
CastilhoL	clonazepam	0.621762
CastilhoL	CoQ10	0.361738
CastilhoL	deanxit-clonazepam	0.698738
CastilhoL	EHLP	0.251595
CastilhoL	gabapentin	0.380738
CastilhoL	gabapentin-lidocaine	0.766357
CastilhoL	GB	0.759095
CastilhoL	GB-Vit	0.999762
CastilhoL	hangekobokuto	0.244286
CastilhoL	ITDI	0.44781
CastilhoL	ITDI-melatonin	0.545214
CastilhoL	lidocaine	0.771238
CastilhoL	lipoic acid + Vit	0.699619
CastilhoL	melatonin	0.462262
CastilhoL	misprost	0.568952
CastilhoL	neramexane	0.435333
CastilhoL	Neurotec	0.673571
CastilhoL	NOR-TOP	0.518524
CastilhoL	nortriptyline	0.579595
CastilhoL	oligonol	0.221952
CastilhoL	ondansetron	0.365667
CastilhoL	oxcarbazepine	0.569952
CastilhoL	paroxetine	0.419857
CastilhoL	pentoxifylline	0.755548
CastilhoL	piribedil	0.680548
CastilhoL	placebo	0.300667
CastilhoL	pramipexole	0.669762
CastilhoL	sertraline	0.373952
CastilhoL	sulodexide	0.523976
CastilhoL	trazodone	0.285238
CastilhoL	vardenafil	0.193952
CastilhoL	VER-PAR	0.534976
CastilhoL	VES-PAR	0.36831
CastilhoL	vestipitant	0.319714
CastilhoL	VitB12	0.312548
CastilhoL	zinc	0.488167
ChauhanB	acamprosate	0.81714
ChauhanB	ALP-ITDI-LPE	0.674628
ChauhanB	alprazolam	0.577674
ChauhanB	alprazolam-ITDI	0.143419
ChauhanB	amitriptyline	0.882279
ChauhanB	betahistine	0.469093
ChauhanB	carbamazepine	0.550698
ChauhanB	caroverine	0.997
ChauhanB	cilostazol	0.0182791
ChauhanB	clonazepam	0.223372
ChauhanB	CoQ10	0.372674
ChauhanB	deanxit-clonazepam	0.33214
ChauhanB	EHLP	0.233907
ChauhanB	gabapentin	0.386837
ChauhanB	gabapentin-lidocaine	0.870721
ChauhanB	GB	0.334605
ChauhanB	GB-Vit	NA
ChauhanB	hangekobokuto	0.217093
ChauhanB	ITDI	0.570116
ChauhanB	ITDI-melatonin	0.659349
ChauhanB	lidocaine	0.856581
ChauhanB	lipoic acid + Vit	0.743605
ChauhanB	melatonin	0.54914
ChauhanB	misprost	0.695674
ChauhanB	neramexane	0.471279
ChauhanB	Neurotec	0.816326
ChauhanB	NOR-TOP	0.57507
ChauhanB	nortriptyline	0.710465
ChauhanB	oligonol	0.168674
ChauhanB	ondansetron	0.372209
ChauhanB	oxcarbazepine	0.662163
ChauhanB	paroxetine	0.438279
ChauhanB	pentoxifylline	0.393302
ChauhanB	piribedil	0.81693
ChauhanB	placebo	0.304535
ChauhanB	pramipexole	0.76686
ChauhanB	sertraline	0.411907
ChauhanB	sulodexide	0.627256
ChauhanB	trazodone	0.255395
ChauhanB	vardenafil	0.135326
ChauhanB	VER-PAR	0.605512
ChauhanB	VES-PAR	0.332047
ChauhanB	vestipitant	0.299279
ChauhanB	VitB12	0.280279
ChauhanB	zinc	0.380884
CiodaroF	acamprosate	0.704116
CiodaroF	ALP-ITDI-LPE	0.564628
CiodaroF	alprazolam	0.512349
CiodaroF	alprazolam-ITDI	0.213977
CiodaroF	amitriptyline	0.756372
CiodaroF	betahistine	0.428047
CiodaroF	carbamazepine	0.472837
CiodaroF	caroverine	0.943372
CiodaroF	cilostazol	0.0595581
CiodaroF	clonazepam	0.607907
CiodaroF	CoQ10	0.379628
CiodaroF	deanxit-clonazepam	0.684558
CiodaroF	EHLP	0.264
CiodaroF	gabapentin	0.312349
CiodaroF	gabapentin-lidocaine	NA
CiodaroF	GB	0.75393
CiodaroF	GB-Vit	0.997512
CiodaroF	hangekobokuto	0.269488
CiodaroF	ITDI	0.452512
CiodaroF	ITDI-melatonin	0.537326
CiodaroF	lidocaine	0.765023
CiodaroF	lipoic acid + Vit	0.681302
CiodaroF	melatonin	0.452744
CiodaroF	misprost	0.595837
CiodaroF	neramexane	0.430651
CiodaroF	Neurotec	0.677488
CiodaroF	NOR-TOP	0.520628
CiodaroF	nortriptyline	0.605698
CiodaroF	oligonol	0.212581
CiodaroF	ondansetron	0.368093
CiodaroF	oxcarbazepine	0.562628
CiodaroF	paroxetine	0.414581
CiodaroF	pentoxifylline	0.757419
CiodaroF	piribedil	0.666814
CiodaroF	placebo	0.311233
CiodaroF	pramipexole	0.652512
CiodaroF	sertraline	0.376
CiodaroF	sulodexide	0.516302
CiodaroF	trazodone	0.298791
CiodaroF	vardenafil	0.202884
CiodaroF	VER-PAR	0.52707
CiodaroF	VES-PAR	0.34686
CiodaroF	vestipitant	0.326558
CiodaroF	VitB12	0.320465
CiodaroF	zinc	0.495372
DadgarniaM	acamprosate	0.69786
DadgarniaM	ALP-ITDI-LPE	0.564326
DadgarniaM	alprazolam	0.47586
DadgarniaM	alprazolam-ITDI	0.211605
DadgarniaM	amitriptyline	0.759605
DadgarniaM	betahistine	0.417558
DadgarniaM	carbamazepine	0.467442
DadgarniaM	caroverine	0.942047
DadgarniaM	cilostazol	0.0572326
DadgarniaM	clonazepam	0.61507
DadgarniaM	CoQ10	0.362279
DadgarniaM	deanxit-clonazepam	0.668209
DadgarniaM	EHLP	0.250209
DadgarniaM	gabapentin	0.367349
DadgarniaM	gabapentin-lidocaine	0.73786
DadgarniaM	GB	0.741442
DadgarniaM	GB-Vit	0.99807
DadgarniaM	hangekobokuto	0.25193
DadgarniaM	ITDI	0.436419
DadgarniaM	ITDI-melatonin	0.533279
DadgarniaM	lidocaine	0.753977
DadgarniaM	lipoic acid + Vit	0.673535
DadgarniaM	melatonin	0.44607
DadgarniaM	misprost	0.563628
DadgarniaM	neramexane	0.423023
DadgarniaM	Neurotec	0.665256
DadgarniaM	NOR-TOP	0.502209
DadgarniaM	nortriptyline	0.576116
DadgarniaM	oligonol	0.211488
DadgarniaM	ondansetron	0.352814
DadgarniaM	oxcarbazepine	0.553488
DadgarniaM	paroxetine	0.40086
DadgarniaM	pentoxifylline	0.753093
DadgarniaM	piribedil	0.670209
DadgarniaM	placebo	0.285512
DadgarniaM	pramipexole	0.644535
DadgarniaM	sertraline	0.36493
DadgarniaM	sulodexide	0.504512
DadgarniaM	trazodone	0.288116
DadgarniaM	vardenafil	0.19314
DadgarniaM	VER-PAR	0.524047
DadgarniaM	VES-PAR	0.334163
DadgarniaM	vestipitant	0.289651
DadgarniaM	VitB12	NA
DadgarniaM	zinc	0.469977
FarhadiM	acamprosate	NA
FarhadiM	ALP-ITDI-LPE	0.563791
FarhadiM	alprazolam	0.504605
FarhadiM	alprazolam-ITDI	0.208651
FarhadiM	amitriptyline	0.759884
FarhadiM	betahistine	0.431093
FarhadiM	carbamazepine	0.48014
FarhadiM	caroverine	0.946419
FarhadiM	cilostazol	0.0495581
FarhadiM	clonazepam	0.61914
FarhadiM	CoQ10	0.375814
FarhadiM	deanxit-clonazepam	0.661651
FarhadiM	EHLP	0.257
FarhadiM	gabapentin	0.382744
FarhadiM	gabapentin-lidocaine	0.755953
FarhadiM	GB	0.754116
FarhadiM	GB-Vit	0.997302
FarhadiM	hangekobokuto	0.261535
FarhadiM	ITDI	0.453581
FarhadiM	ITDI-melatonin	0.537651
FarhadiM	lidocaine	0.755814
FarhadiM	lipoic acid + Vit	0.693116
FarhadiM	melatonin	0.456163
FarhadiM	misprost	0.57786
FarhadiM	neramexane	0.418767
FarhadiM	Neurotec	0.682744
FarhadiM	NOR-TOP	0.535209
FarhadiM	nortriptyline	0.596349
FarhadiM	oligonol	0.214767
FarhadiM	ondansetron	0.363302
FarhadiM	oxcarbazepine	0.565163
FarhadiM	paroxetine	0.391256
FarhadiM	pentoxifylline	0.763953
FarhadiM	piribedil	0.671953
FarhadiM	placebo	0.3
FarhadiM	pramipexole	0.652884
FarhadiM	sertraline	0.373837
FarhadiM	sulodexide	0.509256
FarhadiM	trazodone	0.292093
FarhadiM	vardenafil	0.204116
FarhadiM	VER-PAR	0.535698
FarhadiM	VES-PAR	0.323512
FarhadiM	vestipitant	0.32207
FarhadiM	VitB12	0.31314
FarhadiM	zinc	0.486349
HanS	acamprosate	0.712833
HanS	ALP-ITDI-LPE	0.564833
HanS	alprazolam	0.498571
HanS	alprazolam-ITDI	0.212952
HanS	amitriptyline	0.779976
HanS	betahistine	0.435381
HanS	carbamazepine	0.48581
HanS	caroverine	0.948571
HanS	cilostazol	0.0554286
HanS	clonazepam	NA
HanS	CoQ10	0.363643
HanS	deanxit-clonazepam	NA
HanS	EHLP	0.262548
HanS	gabapentin	0.39031
HanS	gabapentin-lidocaine	0.75669
HanS	GB	0.7605
HanS	GB-Vit	0.998119
HanS	hangekobokuto	0.273548
HanS	ITDI	0.460119
HanS	ITDI-melatonin	0.550929
HanS	lidocaine	0.767595
HanS	lipoic acid + Vit	0.696952
HanS	melatonin	0.459571
HanS	misprost	0.578214
HanS	neramexane	0.433095
HanS	Neurotec	0.66719
HanS	NOR-TOP	0.520595
HanS	nortriptyline	0.588381
HanS	oligonol	0.202262
HanS	ondansetron	0.372714
HanS	oxcarbazepine	0.568095
HanS	paroxetine	0.406238
HanS	pentoxifylline	0.754405
HanS	piribedil	0.68331
HanS	placebo	0.303857
HanS	pramipexole	0.642643
HanS	sertraline	0.377571
HanS	sulodexide	0.513857
HanS	trazodone	0.286571
HanS	vardenafil	0.189571
HanS	VER-PAR	0.524429
HanS	VES-PAR	0.337738
HanS	vestipitant	0.32069
HanS	VitB12	0.305786
HanS	zinc	0.487905
InoT	acamprosate	0.707674
InoT	ALP-ITDI-LPE	0.564465
InoT	alprazolam	0.477581
InoT	alprazolam-ITDI	0.197837
InoT	amitriptyline	0.750395
InoT	betahistine	0.424209
InoT	carbamazepine	0.472163
InoT	caroverine	0.946442
InoT	cilostazol	0.0533256
InoT	clonazepam	0.596535
InoT	CoQ10	0.356279
InoT	deanxit-clonazepam	0.668419
InoT	EHLP	0.258256
InoT	gabapentin	0.371558
InoT	gabapentin-lidocaine	0.752233
InoT	GB	0.747442
InoT	GB-Vit	0.997721
InoT	hangekobokuto	NA
InoT	ITDI	0.438977
InoT	ITDI-melatonin	0.527605
InoT	lidocaine	0.753698
InoT	lipoic acid + Vit	0.677047
InoT	melatonin	0.440488
InoT	misprost	0.559395
InoT	neramexane	0.417628
InoT	Neurotec	0.667
InoT	NOR-TOP	0.500907
InoT	nortriptyline	0.565349
InoT	oligonol	0.197233
InoT	ondansetron	0.355767
InoT	oxcarbazepine	0.551326
InoT	paroxetine	0.389279
InoT	pentoxifylline	0.763837
InoT	piribedil	0.666651
InoT	placebo	0.287767
InoT	pramipexole	0.633837
InoT	sertraline	0.369279
InoT	sulodexide	0.510535
InoT	trazodone	0.276116
InoT	vardenafil	0.183465
InoT	VER-PAR	0.511535
InoT	VES-PAR	0.345814
InoT	vestipitant	0.30186
InoT	VitB12	0.294302
InoT	zinc	0.470767
JalaliM	acamprosate	0.693024
JalaliM	ALP-ITDI-LPE	NA
JalaliM	alprazolam	NA
JalaliM	alprazolam-ITDI	NA
JalaliM	amitriptyline	0.768976
JalaliM	betahistine	0.417049
JalaliM	carbamazepine	0.466488
JalaliM	caroverine	0.943366
JalaliM	cilostazol	0.0496585
JalaliM	clonazepam	0.591317
JalaliM	CoQ10	0.342366
JalaliM	deanxit-clonazepam	0.669073
JalaliM	EHLP	0.245195
JalaliM	gabapentin	0.373073
JalaliM	gabapentin-lidocaine	0.747634
JalaliM	GB	0.74839
JalaliM	GB-Vit	0.997829
JalaliM	hangekobokuto	0.255585
JalaliM	ITDI	0.442317
JalaliM	ITDI-melatonin	0.528171
JalaliM	lidocaine	0.760146
JalaliM	lipoic acid + Vit	0.67078
JalaliM	melatonin	0.440268
JalaliM	misprost	0.569341
JalaliM	neramexane	0.411585
JalaliM	Neurotec	0.661098
JalaliM	NOR-TOP	0.500122
JalaliM	nortriptyline	0.573049
JalaliM	oligonol	0.195171
JalaliM	ondansetron	0.354439
JalaliM	oxcarbazepine	0.55539
JalaliM	paroxetine	0.393293
JalaliM	pentoxifylline	0.750439
JalaliM	piribedil	0.66
JalaliM	placebo	0.28822
JalaliM	pramipexole	0.644122
JalaliM	sertraline	0.377146
JalaliM	sulodexide	0.509976
JalaliM	trazodone	0.283585
JalaliM	vardenafil	0.194293
JalaliM	VER-PAR	0.528951
JalaliM	VES-PAR	0.332585
JalaliM	vestipitant	0.306146
JalaliM	VitB12	0.298415
JalaliM	zinc	0.461927
KhosraviH	acamprosate	0.703698
KhosraviH	ALP-ITDI-LPE	0.558581
KhosraviH	alprazolam	0.496233
KhosraviH	alprazolam-ITDI	0.215581
KhosraviH	amitriptyline	0.770535
KhosraviH	betahistine	0.428953
KhosraviH	carbamazepine	0.469907
KhosraviH	caroverine	0.943605
KhosraviH	cilostazol	0.0628605
KhosraviH	clonazepam	0.611884
KhosraviH	CoQ10	0.36414
KhosraviH	deanxit-clonazepam	0.671558
KhosraviH	EHLP	0.273419
KhosraviH	gabapentin	0.382419
KhosraviH	gabapentin-lidocaine	0.758279
KhosraviH	GB	0.757163
KhosraviH	GB-Vit	0.99786
KhosraviH	hangekobokuto	0.271116
KhosraviH	ITDI	0.460605
KhosraviH	ITDI-melatonin	0.53207
KhosraviH	lidocaine	0.77407
KhosraviH	lipoic acid + Vit	0.691209
KhosraviH	melatonin	0.448581
KhosraviH	misprost	0.572628
KhosraviH	neramexane	0.421814
KhosraviH	Neurotec	NA
KhosraviH	NOR-TOP	0.505698
KhosraviH	nortriptyline	0.590279
KhosraviH	oligonol	0.202488
KhosraviH	ondansetron	0.353163
KhosraviH	oxcarbazepine	0.555791
KhosraviH	paroxetine	0.411581
KhosraviH	pentoxifylline	0.761326
KhosraviH	piribedil	0.678605
KhosraviH	placebo	0.307163
KhosraviH	pramipexole	0.647977
KhosraviH	sertraline	0.373209
KhosraviH	sulodexide	0.522442
KhosraviH	trazodone	0.293419
KhosraviH	vardenafil	0.189558
KhosraviH	VER-PAR	0.508163
KhosraviH	VES-PAR	0.339628
KhosraviH	vestipitant	0.320349
KhosraviH	VitB12	0.312698
KhosraviH	zinc	0.487698
LeeH	acamprosate	0.711932
LeeH	ALP-ITDI-LPE	0.561068
LeeH	alprazolam	0.494409
LeeH	alprazolam-ITDI	0.209636
LeeH	amitriptyline	0.753205
LeeH	betahistine	0.410864
LeeH	carbamazepine	0.465023
LeeH	caroverine	0.943614
LeeH	cilostazol	0.0606364
LeeH	clonazepam	0.593614
LeeH	CoQ10	0.364523
LeeH	deanxit-clonazepam	0.64425
LeeH	EHLP	0.252364
LeeH	gabapentin	0.381727
LeeH	gabapentin-lidocaine	0.734659
LeeH	GB	0.740227
LeeH	GB-Vit	0.996636
LeeH	hangekobokuto	0.257659
LeeH	ITDI	0.528455
LeeH	ITDI-melatonin	0.522818
LeeH	lidocaine	0.750023
LeeH	lipoic acid + Vit	0.673295
LeeH	melatonin	0.449091
LeeH	misprost	0.579273
LeeH	neramexane	0.425227
LeeH	Neurotec	0.653295
LeeH	NOR-TOP	0.5155
LeeH	nortriptyline	0.575386
LeeH	oligonol	0.212977
LeeH	ondansetron	0.345727
LeeH	oxcarbazepine	0.552864
LeeH	paroxetine	0.394205
LeeH	pentoxifylline	0.760886
LeeH	piribedil	0.670159
LeeH	placebo	0.300409
LeeH	pramipexole	0.627273
LeeH	sertraline	0.372932
LeeH	sulodexide	0.522705
LeeH	trazodone	0.293045
LeeH	vardenafil	0.191386
LeeH	VER-PAR	0.524841
LeeH	VES-PAR	0.355159
LeeH	vestipitant	0.324705
LeeH	VitB12	0.317682
LeeH	zinc	0.484636
LimH	acamprosate	0.693628
LimH	ALP-ITDI-LPE	0.553837
LimH	alprazolam	0.470767
LimH	alprazolam-ITDI	0.19614
LimH	amitriptyline	0.75207
LimH	betahistine	0.417907
LimH	carbamazepine	0.461395
LimH	caroverine	0.943558
LimH	cilostazol	NA
LimH	clonazepam	0.609791
LimH	CoQ10	0.353744
LimH	deanxit-clonazepam	0.668791
LimH	EHLP	0.245837
LimH	gabapentin	0.366791
LimH	gabapentin-lidocaine	0.744279
LimH	GB	0.742419
LimH	GB-Vit	0.99714
LimH	hangekobokuto	0.240884
LimH	ITDI	0.43486
LimH	ITDI-melatonin	0.527744
LimH	lidocaine	0.751326
LimH	lipoic acid + Vit	0.670605
LimH	melatonin	0.429698
LimH	misprost	0.569279
LimH	neramexane	0.415558
LimH	Neurotec	0.66007
LimH	NOR-TOP	0.489558
LimH	nortriptyline	0.591116
LimH	oligonol	0.191907
LimH	ondansetron	0.352419
LimH	oxcarbazepine	0.55007
LimH	paroxetine	0.375814
LimH	pentoxifylline	0.75607
LimH	piribedil	0.660442
LimH	placebo	0.281977
LimH	pramipexole	0.632651
LimH	sertraline	0.365116
LimH	sulodexide	0.499512
LimH	trazodone	0.283349
LimH	vardenafil	0.172349
LimH	VER-PAR	0.514302
LimH	VES-PAR	0.312349
LimH	vestipitant	0.296814
LimH	VitB12	0.294674
LimH	zinc	0.461395
MaedaT	acamprosate	0.712628
MaedaT	ALP-ITDI-LPE	0.565442
MaedaT	alprazolam	0.487116
MaedaT	alprazolam-ITDI	0.208233
MaedaT	amitriptyline	0.751791
MaedaT	betahistine	0.426791
MaedaT	carbamazepine	0.466047
MaedaT	caroverine	0.939767
MaedaT	cilostazol	0.0532093
MaedaT	clonazepam	0.602349
MaedaT	CoQ10	0.352977
MaedaT	deanxit-clonazepam	0.670186
MaedaT	EHLP	0.250186
MaedaT	gabapentin	0.359884
MaedaT	gabapentin-lidocaine	0.739233
MaedaT	GB	0.749884
MaedaT	GB-Vit	0.997512
MaedaT	hangekobokuto	0.250302
MaedaT	ITDI	0.431884
MaedaT	ITDI-melatonin	0.528
MaedaT	lidocaine	0.760721
MaedaT	lipoic acid + Vit	0.672209
MaedaT	melatonin	0.429186
MaedaT	misprost	0.562651
MaedaT	neramexane	0.417047
MaedaT	Neurotec	0.659977
MaedaT	NOR-TOP	0.493442
MaedaT	nortriptyline	0.575535
MaedaT	oligonol	NA
MaedaT	ondansetron	0.365349
MaedaT	oxcarbazepine	0.558721
MaedaT	paroxetine	0.396349
MaedaT	pentoxifylline	0.750023
MaedaT	piribedil	0.662884
MaedaT	placebo	0.285488
MaedaT	pramipexole	0.636674
MaedaT	sertraline	0.360744
MaedaT	sulodexide	0.499907
MaedaT	trazodone	0.274209
MaedaT	vardenafil	0.167279
MaedaT	VER-PAR	0.510186
MaedaT	VES-PAR	0.329116
MaedaT	vestipitant	0.318512
MaedaT	VitB12	0.297442
MaedaT	zinc	0.47293
PetridouA	acamprosate	0.700477
PetridouA	ALP-ITDI-LPE	0.567909
PetridouA	alprazolam	0.490659
PetridouA	alprazolam-ITDI	0.218818
PetridouA	amitriptyline	0.755682
PetridouA	betahistine	0.432886
PetridouA	carbamazepine	0.478455
PetridouA	caroverine	0.933591
PetridouA	cilostazol	0.0576591
PetridouA	clonazepam	0.604545
PetridouA	CoQ10	0.378795
PetridouA	deanxit-clonazepam	0.663864
PetridouA	EHLP	0.266295
PetridouA	gabapentin	0.383545
PetridouA	gabapentin-lidocaine	0.742114
PetridouA	GB	0.736114
PetridouA	GB-Vit	0.997295
PetridouA	hangekobokuto	0.269455
PetridouA	ITDI	0.446386
PetridouA	ITDI-melatonin	0.544386
PetridouA	lidocaine	0.752659
PetridouA	lipoic acid + Vit	0.630614
PetridouA	melatonin	0.455568
PetridouA	misprost	0.567955
PetridouA	neramexane	0.413727
PetridouA	Neurotec	0.662841
PetridouA	NOR-TOP	0.508205
PetridouA	nortriptyline	0.586705
PetridouA	oligonol	0.213159
PetridouA	ondansetron	0.367795
PetridouA	oxcarbazepine	0.560205
PetridouA	paroxetine	0.403
PetridouA	pentoxifylline	0.728182
PetridouA	piribedil	0.668159
PetridouA	placebo	0.304432
PetridouA	pramipexole	0.648432
PetridouA	sertraline	0.371
PetridouA	sulodexide	0.50925
PetridouA	trazodone	0.29
PetridouA	vardenafil	0.213
PetridouA	VER-PAR	0.513273
PetridouA	VES-PAR	0.345114
PetridouA	vestipitant	0.323273
PetridouA	VitB12	0.308455
PetridouA	zinc	0.486068
PiccirilloJ	acamprosate	0.691795
PiccirilloJ	ALP-ITDI-LPE	0.563455
PiccirilloJ	alprazolam	0.48375
PiccirilloJ	alprazolam-ITDI	0.213477
PiccirilloJ	amitriptyline	0.744477
PiccirilloJ	betahistine	0.432932
PiccirilloJ	carbamazepine	0.494023
PiccirilloJ	caroverine	0.932591
PiccirilloJ	cilostazol	0.0684318
PiccirilloJ	clonazepam	0.601273
PiccirilloJ	CoQ10	0.375159
PiccirilloJ	deanxit-clonazepam	0.660409
PiccirilloJ	EHLP	0.267091
PiccirilloJ	gabapentin	0.415386
PiccirilloJ	gabapentin-lidocaine	0.744068
PiccirilloJ	GB	0.742886
PiccirilloJ	GB-Vit	0.997
PiccirilloJ	hangekobokuto	0.269568
PiccirilloJ	ITDI	0.443841
PiccirilloJ	ITDI-melatonin	0.529091
PiccirilloJ	lidocaine	0.740886
PiccirilloJ	lipoic acid + Vit	0.656705
PiccirilloJ	melatonin	0.450455
PiccirilloJ	misprost	0.575364
PiccirilloJ	neramexane	0.434727
PiccirilloJ	Neurotec	0.651295
PiccirilloJ	NOR-TOP	0.488386
PiccirilloJ	nortriptyline	0.570614
PiccirilloJ	oligonol	0.227886
PiccirilloJ	ondansetron	0.3595
PiccirilloJ	oxcarbazepine	0.55075
PiccirilloJ	paroxetine	0.411114
PiccirilloJ	pentoxifylline	0.724545
PiccirilloJ	piribedil	0.65325
PiccirilloJ	placebo	0.307614
PiccirilloJ	pramipexole	0.629409
PiccirilloJ	sertraline	0.375
PiccirilloJ	sulodexide	0.520091
PiccirilloJ	trazodone	0.302295
PiccirilloJ	vardenafil	0.206523
PiccirilloJ	VER-PAR	0.512545
PiccirilloJ	VES-PAR	0.346659
PiccirilloJ	vestipitant	0.319636
PiccirilloJ	VitB12	0.328136
PiccirilloJ	zinc	0.485909
PolanskiJ	acamprosate	0.719977
PolanskiJ	ALP-ITDI-LPE	0.597227
PolanskiJ	alprazolam	0.489091
PolanskiJ	alprazolam-ITDI	0.121614
PolanskiJ	amitriptyline	0.786795
PolanskiJ	betahistine	0.403864
PolanskiJ	carbamazepine	0.466568
PolanskiJ	caroverine	0.948477
PolanskiJ	cilostazol	0.0135455
PolanskiJ	clonazepam	0.882432
PolanskiJ	CoQ10	0.308591
PolanskiJ	deanxit-clonazepam	0.907114
PolanskiJ	EHLP	0.183477
PolanskiJ	gabapentin	0.315545
PolanskiJ	gabapentin-lidocaine	0.762705
PolanskiJ	GB	0.922114
PolanskiJ	GB-Vit	0.999955
PolanskiJ	hangekobokuto	0.179545
PolanskiJ	ITDI	0.487636
PolanskiJ	ITDI-melatonin	0.553136
PolanskiJ	lidocaine	0.768955
PolanskiJ	lipoic acid + Vit	0.719864
PolanskiJ	melatonin	0.45775
PolanskiJ	misprost	0.59425
PolanskiJ	neramexane	0.395545
PolanskiJ	Neurotec	0.709341
PolanskiJ	NOR-TOP	0.507727
PolanskiJ	nortriptyline	0.610295
PolanskiJ	oligonol	0.133455
PolanskiJ	ondansetron	0.305955
PolanskiJ	oxcarbazepine	0.561545
PolanskiJ	paroxetine	0.366477
PolanskiJ	pentoxifylline	0.934159
PolanskiJ	piribedil	0.714636
PolanskiJ	placebo	0.245886
PolanskiJ	pramipexole	0.662455
PolanskiJ	sertraline	0.342091
PolanskiJ	sulodexide	0.521227
PolanskiJ	trazodone	0.202795
PolanskiJ	vardenafil	0.107636
PolanskiJ	VER-PAR	0.518386
PolanskiJ	VES-PAR	0.284409
PolanskiJ	vestipitant	0.244023
PolanskiJ	VitB12	0.230455
PolanskiJ	zinc	0.311273
RobertsC	acamprosate	0.694048
RobertsC	ALP-ITDI-LPE	0.557095
RobertsC	alprazolam	0.472476
RobertsC	alprazolam-ITDI	0.202119
RobertsC	amitriptyline	0.766738
RobertsC	betahistine	0.41531
RobertsC	carbamazepine	0.470071
RobertsC	caroverine	0.9435
RobertsC	cilostazol	0.0528095
RobertsC	clonazepam	0.601548
RobertsC	CoQ10	0.364095
RobertsC	deanxit-clonazepam	0.644357
RobertsC	EHLP	0.241262
RobertsC	gabapentin	0.369119
RobertsC	gabapentin-lidocaine	0.738381
RobertsC	GB	0.74781
RobertsC	GB-Vit	0.997405
RobertsC	hangekobokuto	0.261238
RobertsC	ITDI	0.438619
RobertsC	ITDI-melatonin	0.518643
RobertsC	lidocaine	0.749071
RobertsC	lipoic acid + Vit	0.671238
RobertsC	melatonin	0.438262
RobertsC	misprost	0.55669
RobertsC	neramexane	0.405952
RobertsC	Neurotec	0.660667
RobertsC	NOR-TOP	0.494119
RobertsC	nortriptyline	0.574905
RobertsC	oligonol	0.203048
RobertsC	ondansetron	0.354214
RobertsC	oxcarbazepine	0.545024
RobertsC	paroxetine	0.39331
RobertsC	pentoxifylline	0.749095
RobertsC	piribedil	0.666571
RobertsC	placebo	0.286
RobertsC	pramipexole	0.631881
RobertsC	sertraline	0.370024
RobertsC	sulodexide	0.502452
RobertsC	trazodone	0.285167
RobertsC	vardenafil	0.185976
RobertsC	VER-PAR	0.51331
RobertsC	VES-PAR	NA
RobertsC	vestipitant	NA
RobertsC	VitB12	0.302
RobertsC	zinc	0.464381
SharmaA	acamprosate	0.70486
SharmaA	ALP-ITDI-LPE	0.587302
SharmaA	alprazolam	0.493674
SharmaA	alprazolam-ITDI	0.20807
SharmaA	amitriptyline	0.760442
SharmaA	betahistine	0.418093
SharmaA	carbamazepine	0.46686
SharmaA	caroverine	0.945581
SharmaA	cilostazol	0.0559302
SharmaA	clonazepam	0.600349
SharmaA	CoQ10	0.362651
SharmaA	deanxit-clonazepam	0.683349
SharmaA	EHLP	0.262767
SharmaA	gabapentin	0.379953
SharmaA	gabapentin-lidocaine	0.753605
SharmaA	GB	0.75393
SharmaA	GB-Vit	0.997535
SharmaA	hangekobokuto	0.269186
SharmaA	ITDI	0.455163
SharmaA	ITDI-melatonin	0.528605
SharmaA	lidocaine	0.765186
SharmaA	lipoic acid + Vit	0.678837
SharmaA	melatonin	0.447186
SharmaA	misprost	NA
SharmaA	neramexane	0.429651
SharmaA	Neurotec	0.668302
SharmaA	NOR-TOP	0.505884
SharmaA	nortriptyline	0.584023
SharmaA	oligonol	0.213023
SharmaA	ondansetron	0.364419
SharmaA	oxcarbazepine	0.555372
SharmaA	paroxetine	0.403326
SharmaA	pentoxifylline	0.762233
SharmaA	piribedil	0.667419
SharmaA	placebo	0.304256
SharmaA	pramipexole	0.634907
SharmaA	sertraline	0.376581
SharmaA	sulodexide	0.521442
SharmaA	trazodone	0.294953
SharmaA	vardenafil	0.184721
SharmaA	VER-PAR	0.534721
SharmaA	VES-PAR	0.332279
SharmaA	vestipitant	0.304837
SharmaA	VitB12	0.301302
SharmaA	zinc	0.477233
ShimH	acamprosate	0.702262
ShimH	ALP-ITDI-LPE	NA
ShimH	alprazolam	0.482548
ShimH	alprazolam-ITDI	NA
ShimH	amitriptyline	0.754595
ShimH	betahistine	0.425238
ShimH	carbamazepine	0.481952
ShimH	caroverine	0.944286
ShimH	cilostazol	0.0557381
ShimH	clonazepam	0.597833
ShimH	CoQ10	0.358643
ShimH	deanxit-clonazepam	0.664286
ShimH	EHLP	0.251214
ShimH	gabapentin	0.370333
ShimH	gabapentin-lidocaine	0.745571
ShimH	GB	0.746357
ShimH	GB-Vit	0.997595
ShimH	hangekobokuto	0.251286
ShimH	ITDI	0.444619
ShimH	ITDI-melatonin	0.518381
ShimH	lidocaine	0.758095
ShimH	lipoic acid + Vit	0.678667
ShimH	melatonin	0.429905
ShimH	misprost	0.56969
ShimH	neramexane	0.418024
ShimH	Neurotec	0.674071
ShimH	NOR-TOP	0.492595
ShimH	nortriptyline	0.5845
ShimH	oligonol	0.210333
ShimH	ondansetron	0.351357
ShimH	oxcarbazepine	0.545357
ShimH	paroxetine	0.392714
ShimH	pentoxifylline	0.748881
ShimH	piribedil	0.659143
ShimH	placebo	0.291214
ShimH	pramipexole	0.629286
ShimH	sertraline	0.363571
ShimH	sulodexide	0.508857
ShimH	trazodone	0.286143
ShimH	vardenafil	0.179357
ShimH	VER-PAR	0.520405
ShimH	VES-PAR	0.331381
ShimH	vestipitant	0.311381
ShimH	VitB12	0.300143
ShimH	zinc	0.47219
SuckfullM	acamprosate	0.690349
SuckfullM	ALP-ITDI-LPE	0.56614
SuckfullM	alprazolam	0.469837
SuckfullM	alprazolam-ITDI	0.207256
SuckfullM	amitriptyline	0.763302
SuckfullM	betahistine	0.417628
SuckfullM	carbamazepine	0.482512
SuckfullM	caroverine	0.945767
SuckfullM	cilostazol	0.0562558
SuckfullM	clonazepam	0.609186
SuckfullM	CoQ10	0.355163
SuckfullM	deanxit-clonazepam	0.675116
SuckfullM	EHLP	0.24386
SuckfullM	gabapentin	0.375698
SuckfullM	gabapentin-lidocaine	0.749953
SuckfullM	GB	0.74886
SuckfullM	GB-Vit	0.997419
SuckfullM	hangekobokuto	0.266488
SuckfullM	ITDI	0.444651
SuckfullM	ITDI-melatonin	0.519581
SuckfullM	lidocaine	0.751395
SuckfullM	lipoic acid + Vit	0.681395
SuckfullM	melatonin	0.449349
SuckfullM	misprost	0.579047
SuckfullM	neramexane	NA
SuckfullM	Neurotec	0.66607
SuckfullM	NOR-TOP	0.512674
SuckfullM	nortriptyline	0.57793
SuckfullM	oligonol	0.201372
SuckfullM	ondansetron	0.359953
SuckfullM	oxcarbazepine	0.545535
SuckfullM	paroxetine	0.387023
SuckfullM	pentoxifylline	0.762163
SuckfullM	piribedil	0.676512
SuckfullM	placebo	0.295302
SuckfullM	pramipexole	0.638628
SuckfullM	sertraline	0.369233
SuckfullM	sulodexide	0.52486
SuckfullM	trazodone	0.277419
SuckfullM	vardenafil	0.192233
SuckfullM	VER-PAR	0.523628
SuckfullM	VES-PAR	0.337186
SuckfullM	vestipitant	0.313163
SuckfullM	VitB12	0.319628
SuckfullM	zinc	0.473279
TaslimiS	acamprosate	0.703581
TaslimiS	ALP-ITDI-LPE	0.56486
TaslimiS	alprazolam	0.482488
TaslimiS	alprazolam-ITDI	0.21786
TaslimiS	amitriptyline	0.765023
TaslimiS	betahistine	0.428512
TaslimiS	carbamazepine	0.466953
TaslimiS	caroverine	0.940558
TaslimiS	cilostazol	0.0567209
TaslimiS	clonazepam	0.61886
TaslimiS	CoQ10	0.346372
TaslimiS	deanxit-clonazepam	0.675
TaslimiS	EHLP	0.249163
TaslimiS	gabapentin	0.381023
TaslimiS	gabapentin-lidocaine	0.751116
TaslimiS	GB	0.742419
TaslimiS	GB-Vit	0.997628
TaslimiS	hangekobokuto	0.257047
TaslimiS	ITDI	0.438279
TaslimiS	ITDI-melatonin	0.527209
TaslimiS	lidocaine	0.754349
TaslimiS	lipoic acid + Vit	0.67286
TaslimiS	melatonin	0.437395
TaslimiS	misprost	0.570628
TaslimiS	neramexane	0.419535
TaslimiS	Neurotec	0.670651
TaslimiS	NOR-TOP	0.493326
TaslimiS	nortriptyline	0.589651
TaslimiS	oligonol	0.198209
TaslimiS	ondansetron	NA
TaslimiS	oxcarbazepine	0.558047
TaslimiS	paroxetine	0.396651
TaslimiS	pentoxifylline	0.757884
TaslimiS	piribedil	0.659209
TaslimiS	placebo	0.293442
TaslimiS	pramipexole	0.644721
TaslimiS	sertraline	0.364907
TaslimiS	sulodexide	0.514326
TaslimiS	trazodone	0.282256
TaslimiS	vardenafil	0.193256
TaslimiS	VER-PAR	0.509395
TaslimiS	VES-PAR	0.328884
TaslimiS	vestipitant	0.305419
TaslimiS	VitB12	0.296907
TaslimiS	zinc	0.477419
WitsellD	acamprosate	0.7055
WitsellD	ALP-ITDI-LPE	0.539409
WitsellD	alprazolam	0.496977
WitsellD	alprazolam-ITDI	0.223205
WitsellD	amitriptyline	0.750136
WitsellD	betahistine	0.433591
WitsellD	carbamazepine	0.488636
WitsellD	caroverine	0.938818
WitsellD	cilostazol	0.0651136
WitsellD	clonazepam	0.612614
WitsellD	CoQ10	0.360773
WitsellD	deanxit-clonazepam	0.639591
WitsellD	EHLP	0.263523
WitsellD	gabapentin	0.43575
WitsellD	gabapentin-lidocaine	0.761659
WitsellD	GB	0.732
WitsellD	GB-Vit	0.996909
WitsellD	hangekobokuto	0.276091
WitsellD	ITDI	0.456909
WitsellD	ITDI-melatonin	0.519159
WitsellD	lidocaine	0.739364
WitsellD	lipoic acid + Vit	0.666227
WitsellD	melatonin	0.452182
WitsellD	misprost	0.554227
WitsellD	neramexane	0.412977
WitsellD	Neurotec	0.660091
WitsellD	NOR-TOP	0.4945
WitsellD	nortriptyline	0.579318
WitsellD	oligonol	0.215273
WitsellD	ondansetron	0.362614
WitsellD	oxcarbazepine	0.55925
WitsellD	paroxetine	0.399659
WitsellD	pentoxifylline	0.740591
WitsellD	piribedil	0.6725
WitsellD	placebo	0.305091
WitsellD	pramipexole	0.614477
WitsellD	sertraline	0.383364
WitsellD	sulodexide	0.518318
WitsellD	trazodone	0.304636
WitsellD	vardenafil	0.210341
WitsellD	VER-PAR	0.500477
WitsellD	VES-PAR	0.332614
WitsellD	vestipitant	0.318545
WitsellD	VitB12	0.329773
WitsellD	zinc	0.477227
YenerH	acamprosate	0.699091
YenerH	ALP-ITDI-LPE	0.558182
YenerH	alprazolam	0.493023
YenerH	alprazolam-ITDI	0.211114
YenerH	amitriptyline	0.768705
YenerH	betahistine	0.420318
YenerH	carbamazepine	0.462659
YenerH	caroverine	0.937318
YenerH	cilostazol	0.0554545
YenerH	clonazepam	0.609795
YenerH	CoQ10	0.358773
YenerH	deanxit-clonazepam	0.676932
YenerH	EHLP	0.275364
YenerH	gabapentin	0.384273
YenerH	gabapentin-lidocaine	0.744227
YenerH	GB	0.750682
YenerH	GB-Vit	0.997545
YenerH	hangekobokuto	0.266023
YenerH	ITDI	0.339909
YenerH	ITDI-melatonin	0.521159
YenerH	lidocaine	0.744068
YenerH	lipoic acid + Vit	0.686773
YenerH	melatonin	0.457955
YenerH	misprost	0.57375
YenerH	neramexane	0.425068
YenerH	Neurotec	0.66275
YenerH	NOR-TOP	0.503909
YenerH	nortriptyline	0.591182
YenerH	oligonol	0.216045
YenerH	ondansetron	0.375227
YenerH	oxcarbazepine	0.568932
YenerH	paroxetine	0.406977
YenerH	pentoxifylline	0.753614
YenerH	piribedil	0.660795
YenerH	placebo	0.307455
YenerH	pramipexole	0.632455
YenerH	sertraline	0.387114
YenerH	sulodexide	0.520045
YenerH	trazodone	0.295432
YenerH	vardenafil	0.207045
YenerH	VER-PAR	0.510068
YenerH	VES-PAR	0.352977
YenerH	vestipitant	0.322568
YenerH	VitB12	0.321477
YenerH	zinc	0.485773
MahendruB	acamprosate	0.717372
MahendruB	ALP-ITDI-LPE	0.584581
MahendruB	alprazolam	0.504651
MahendruB	alprazolam-ITDI	0.206116
MahendruB	amitriptyline	0.774279
MahendruB	betahistine	0.437512
MahendruB	carbamazepine	0.487674
MahendruB	caroverine	NA
MahendruB	cilostazol	0.0555116
MahendruB	clonazepam	0.625698
MahendruB	CoQ10	0.365791
MahendruB	deanxit-clonazepam	0.698535
MahendruB	EHLP	0.262651
MahendruB	gabapentin	0.383163
MahendruB	gabapentin-lidocaine	0.777163
MahendruB	GB	0.762302
MahendruB	GB-Vit	0.999698
MahendruB	hangekobokuto	0.261186
MahendruB	ITDI	0.465395
MahendruB	ITDI-melatonin	0.541465
MahendruB	lidocaine	0.783674
MahendruB	lipoic acid + Vit	0.703163
MahendruB	melatonin	0.455256
MahendruB	misprost	0.577233
MahendruB	neramexane	0.425884
MahendruB	Neurotec	0.69014
MahendruB	NOR-TOP	0.524977
MahendruB	nortriptyline	0.595791
MahendruB	oligonol	0.219744
MahendruB	ondansetron	0.354488
MahendruB	oxcarbazepine	0.555419
MahendruB	paroxetine	0.410581
MahendruB	pentoxifylline	0.772488
MahendruB	piribedil	0.683698
MahendruB	placebo	0.303023
MahendruB	pramipexole	0.646953
MahendruB	sertraline	0.376837
MahendruB	sulodexide	0.527721
MahendruB	trazodone	0.296767
MahendruB	vardenafil	0.194721
MahendruB	VER-PAR	0.534605
MahendruB	VES-PAR	0.331605
MahendruB	vestipitant	0.324977
MahendruB	VitB12	0.308581
MahendruB	zinc	0.49093
SziklaiI	acamprosate	0.714326
SziklaiI	ALP-ITDI-LPE	0.558442
SziklaiI	alprazolam	0.494953
SziklaiI	alprazolam-ITDI	0.216953
SziklaiI	amitriptyline	0.767
SziklaiI	betahistine	0.419744
SziklaiI	carbamazepine	0.486651
SziklaiI	caroverine	0.945651
SziklaiI	cilostazol	0.051093
SziklaiI	clonazepam	0.608233
SziklaiI	CoQ10	0.363419
SziklaiI	deanxit-clonazepam	0.686698
SziklaiI	EHLP	0.246628
SziklaiI	gabapentin	0.382907
SziklaiI	gabapentin-lidocaine	0.753442
SziklaiI	GB	0.756814
SziklaiI	GB-Vit	0.997395
SziklaiI	hangekobokuto	0.267326
SziklaiI	ITDI	0.458767
SziklaiI	ITDI-melatonin	0.533465
SziklaiI	lidocaine	0.762465
SziklaiI	lipoic acid + Vit	0.68286
SziklaiI	melatonin	0.452372
SziklaiI	misprost	0.578791
SziklaiI	neramexane	0.426023
SziklaiI	Neurotec	0.664837
SziklaiI	NOR-TOP	0.513907
SziklaiI	nortriptyline	0.601558
SziklaiI	oligonol	0.20486
SziklaiI	ondansetron	0.354884
SziklaiI	oxcarbazepine	0.565674
SziklaiI	paroxetine	0.391512
SziklaiI	pentoxifylline	0.760953
SziklaiI	piribedil	0.673233
SziklaiI	placebo	0.299791
SziklaiI	pramipexole	NA
SziklaiI	sertraline	0.387233
SziklaiI	sulodexide	0.527233
SziklaiI	trazodone	0.281791
SziklaiI	vardenafil	0.195186
SziklaiI	VER-PAR	0.516209
SziklaiI	VES-PAR	0.333674
SziklaiI	vestipitant	0.316698
SziklaiI	VitB12	0.323721
SziklaiI	zinc	0.474628
GeramiH	acamprosate	0.700881
GeramiH	ALP-ITDI-LPE	0.557048
GeramiH	alprazolam	0.497905
GeramiH	alprazolam-ITDI	0.207238
GeramiH	amitriptyline	0.766429
GeramiH	betahistine	0.422881
GeramiH	carbamazepine	NA
GeramiH	caroverine	0.942548
GeramiH	cilostazol	0.0515952
GeramiH	clonazepam	0.623738
GeramiH	CoQ10	0.352881
GeramiH	deanxit-clonazepam	0.70031
GeramiH	EHLP	0.258595
GeramiH	gabapentin	0.374357
GeramiH	gabapentin-lidocaine	0.74319
GeramiH	GB	0.746405
GeramiH	GB-Vit	0.996905
GeramiH	hangekobokuto	0.277762
GeramiH	ITDI	0.447548
GeramiH	ITDI-melatonin	0.525786
GeramiH	lidocaine	0.762524
GeramiH	lipoic acid + Vit	0.679405
GeramiH	melatonin	0.452
GeramiH	misprost	0.569833
GeramiH	neramexane	0.417881
GeramiH	Neurotec	0.674238
GeramiH	NOR-TOP	0.487167
GeramiH	nortriptyline	0.594214
GeramiH	oligonol	0.220881
GeramiH	ondansetron	0.375833
GeramiH	oxcarbazepine	NA
GeramiH	paroxetine	0.398476
GeramiH	pentoxifylline	0.762095
GeramiH	piribedil	0.676643
GeramiH	placebo	0.302262
GeramiH	pramipexole	0.647952
GeramiH	sertraline	0.374167
GeramiH	sulodexide	0.514452
GeramiH	trazodone	0.272833
GeramiH	vardenafil	0.179976
GeramiH	VER-PAR	0.515452
GeramiH	VES-PAR	0.334024
GeramiH	vestipitant	0.311929
GeramiH	VitB12	0.30969
GeramiH	zinc	0.472071
BayarN	acamprosate	0.699256
BayarN	ALP-ITDI-LPE	0.588535
BayarN	alprazolam	0.502605
BayarN	alprazolam-ITDI	0.210907
BayarN	amitriptyline	NA
BayarN	betahistine	0.431465
BayarN	carbamazepine	0.472488
BayarN	caroverine	0.946186
BayarN	cilostazol	0.051093
BayarN	clonazepam	0.616093
BayarN	CoQ10	0.366116
BayarN	deanxit-clonazepam	0.68486
BayarN	EHLP	0.263628
BayarN	gabapentin	0.385977
BayarN	gabapentin-lidocaine	0.749651
BayarN	GB	0.755326
BayarN	GB-Vit	0.997279
BayarN	hangekobokuto	0.268884
BayarN	ITDI	0.449651
BayarN	ITDI-melatonin	0.524837
BayarN	lidocaine	0.780349
BayarN	lipoic acid + Vit	0.693884
BayarN	melatonin	0.457674
BayarN	misprost	0.576116
BayarN	neramexane	0.417419
BayarN	Neurotec	0.672953
BayarN	NOR-TOP	0.52114
BayarN	nortriptyline	0.587907
BayarN	oligonol	0.20586
BayarN	ondansetron	0.388419
BayarN	oxcarbazepine	0.569674
BayarN	paroxetine	0.402605
BayarN	pentoxifylline	0.762628
BayarN	piribedil	0.673395
BayarN	placebo	0.304907
BayarN	pramipexole	0.647465
BayarN	sertraline	0.382116
BayarN	sulodexide	0.528837
BayarN	trazodone	0.29214
BayarN	vardenafil	0.202767
BayarN	VER-PAR	0.536326
BayarN	VES-PAR	0.332419
BayarN	vestipitant	0.307326
BayarN	VitB12	0.309023
BayarN	zinc	0.481814
ArdaH	acamprosate	0.697091
ArdaH	ALP-ITDI-LPE	0.569318
ArdaH	alprazolam	0.497386
ArdaH	alprazolam-ITDI	0.206841
ArdaH	amitriptyline	0.77675
ArdaH	betahistine	0.419568
ArdaH	carbamazepine	0.489955
ArdaH	caroverine	0.950795
ArdaH	cilostazol	0.0513182
ArdaH	clonazepam	0.62625
ArdaH	CoQ10	0.358545
ArdaH	deanxit-clonazepam	0.681727
ArdaH	EHLP	0.255227
ArdaH	gabapentin	0.379591
ArdaH	gabapentin-lidocaine	0.756864
ArdaH	GB	0.759795
ArdaH	GB-Vit	0.997659
ArdaH	hangekobokuto	0.256159
ArdaH	ITDI	0.459545
ArdaH	ITDI-melatonin	0.527455
ArdaH	lidocaine	0.769705
ArdaH	lipoic acid + Vit	0.692727
ArdaH	melatonin	0.4525
ArdaH	misprost	0.571
ArdaH	neramexane	0.412364
ArdaH	Neurotec	0.681091
ArdaH	NOR-TOP	0.524045
ArdaH	nortriptyline	0.594545
ArdaH	oligonol	0.204409
ArdaH	ondansetron	0.349864
ArdaH	oxcarbazepine	0.554545
ArdaH	paroxetine	0.400636
ArdaH	pentoxifylline	0.772295
ArdaH	piribedil	0.681477
ArdaH	placebo	0.30025
ArdaH	pramipexole	0.657977
ArdaH	sertraline	0.380227
ArdaH	sulodexide	0.530045
ArdaH	trazodone	0.279568
ArdaH	vardenafil	0.186818
ArdaH	VER-PAR	0.520023
ArdaH	VES-PAR	0.341341
ArdaH	vestipitant	0.314205
ArdaH	VitB12	0.314932
ArdaH	zinc	0.295568
RobinsonS	acamprosate	0.703419
RobinsonS	ALP-ITDI-LPE	0.556163
RobinsonS	alprazolam	0.492953
RobinsonS	alprazolam-ITDI	0.209349
RobinsonS	amitriptyline	0.762465
RobinsonS	betahistine	0.414442
RobinsonS	carbamazepine	0.465372
RobinsonS	caroverine	0.946209
RobinsonS	cilostazol	0.0504419
RobinsonS	clonazepam	0.618884
RobinsonS	CoQ10	0.350163
RobinsonS	deanxit-clonazepam	0.675953
RobinsonS	EHLP	0.255395
RobinsonS	gabapentin	0.383349
RobinsonS	gabapentin-lidocaine	0.754791
RobinsonS	GB	0.745233
RobinsonS	GB-Vit	0.997512
RobinsonS	hangekobokuto	0.265093
RobinsonS	ITDI	0.445512
RobinsonS	ITDI-melatonin	0.524465
RobinsonS	lidocaine	0.759163
RobinsonS	lipoic acid + Vit	0.682419
RobinsonS	melatonin	0.452837
RobinsonS	misprost	0.563395
RobinsonS	neramexane	0.426628
RobinsonS	Neurotec	0.662419
RobinsonS	NOR-TOP	0.503
RobinsonS	nortriptyline	0.571093
RobinsonS	oligonol	0.207767
RobinsonS	ondansetron	0.355953
RobinsonS	oxcarbazepine	0.557395
RobinsonS	paroxetine	NA
RobinsonS	pentoxifylline	0.753372
RobinsonS	piribedil	0.673209
RobinsonS	placebo	0.293581
RobinsonS	pramipexole	0.629581
RobinsonS	sertraline	0.371233
RobinsonS	sulodexide	0.521326
RobinsonS	trazodone	0.284744
RobinsonS	vardenafil	0.191558
RobinsonS	VER-PAR	0.503907
RobinsonS	VES-PAR	0.333953
RobinsonS	vestipitant	0.300767
RobinsonS	VitB12	0.303605
RobinsonS	zinc	0.47993
DibG	acamprosate	0.694442
DibG	ALP-ITDI-LPE	0.551395
DibG	alprazolam	0.491209
DibG	alprazolam-ITDI	0.199512
DibG	amitriptyline	0.758326
DibG	betahistine	0.421488
DibG	carbamazepine	0.48307
DibG	caroverine	0.948279
DibG	cilostazol	0.0501628
DibG	clonazepam	0.611884
DibG	CoQ10	0.344767
DibG	deanxit-clonazepam	0.674116
DibG	EHLP	0.26
DibG	gabapentin	0.364372
DibG	gabapentin-lidocaine	0.752
DibG	GB	0.740674
DibG	GB-Vit	0.997558
DibG	hangekobokuto	0.266023
DibG	ITDI	0.442814
DibG	ITDI-melatonin	0.521558
DibG	lidocaine	0.772233
DibG	lipoic acid + Vit	0.669186
DibG	melatonin	0.431209
DibG	misprost	0.564442
DibG	neramexane	0.417419
DibG	Neurotec	0.664233
DibG	NOR-TOP	0.495233
DibG	nortriptyline	0.56707
DibG	oligonol	0.205488
DibG	ondansetron	0.352791
DibG	oxcarbazepine	0.543791
DibG	paroxetine	0.408953
DibG	pentoxifylline	0.74807
DibG	piribedil	0.661186
DibG	placebo	0.289884
DibG	pramipexole	0.640395
DibG	sertraline	0.358953
DibG	sulodexide	0.526674
DibG	trazodone	NA
DibG	vardenafil	0.181767
DibG	VER-PAR	0.515558
DibG	VES-PAR	0.329419
DibG	vestipitant	0.31093
DibG	VitB12	0.305419
DibG	zinc	0.466047
MazurekB	acamprosate	0.703512
MazurekB	ALP-ITDI-LPE	0.568
MazurekB	alprazolam	0.489628
MazurekB	alprazolam-ITDI	0.207233
MazurekB	amitriptyline	0.74886
MazurekB	betahistine	0.409349
MazurekB	carbamazepine	0.46214
MazurekB	caroverine	0.946023
MazurekB	cilostazol	0.0514651
MazurekB	clonazepam	0.608977
MazurekB	CoQ10	0.351744
MazurekB	deanxit-clonazepam	0.678047
MazurekB	EHLP	0.24886
MazurekB	gabapentin	0.356791
MazurekB	gabapentin-lidocaine	0.733605
MazurekB	GB	0.74993
MazurekB	GB-Vit	0.997535
MazurekB	hangekobokuto	0.256884
MazurekB	ITDI	0.440442
MazurekB	ITDI-melatonin	0.530512
MazurekB	lidocaine	0.764465
MazurekB	lipoic acid + Vit	0.675744
MazurekB	melatonin	0.435209
MazurekB	misprost	0.565744
MazurekB	neramexane	0.414581
MazurekB	Neurotec	0.660302
MazurekB	NOR-TOP	0.507279
MazurekB	nortriptyline	0.57093
MazurekB	oligonol	0.201744
MazurekB	ondansetron	0.349977
MazurekB	oxcarbazepine	0.549907
MazurekB	paroxetine	0.393093
MazurekB	pentoxifylline	0.743349
MazurekB	piribedil	0.675395
MazurekB	placebo	0.28686
MazurekB	pramipexole	0.637372
MazurekB	sertraline	0.362093
MazurekB	sulodexide	0.497395
MazurekB	trazodone	0.269512
MazurekB	vardenafil	NA
MazurekB	VER-PAR	0.518698
MazurekB	VES-PAR	0.325395
MazurekB	vestipitant	0.312698
MazurekB	VitB12	0.286023
MazurekB	zinc	0.456698
CoelhoC	acamprosate	0.703091
CoelhoC	ALP-ITDI-LPE	0.569545
CoelhoC	alprazolam	0.482227
CoelhoC	alprazolam-ITDI	0.208068
CoelhoC	amitriptyline	0.763727
CoelhoC	betahistine	0.407295
CoelhoC	carbamazepine	0.475341
CoelhoC	caroverine	0.948295
CoelhoC	cilostazol	0.0449091
CoelhoC	clonazepam	0.605114
CoelhoC	CoQ10	0.3605
CoelhoC	deanxit-clonazepam	0.68425
CoelhoC	EHLP	0.248
CoelhoC	gabapentin	0.371318
CoelhoC	gabapentin-lidocaine	0.743886
CoelhoC	GB	0.752682
CoelhoC	GB-Vit	0.997795
CoelhoC	hangekobokuto	0.243364
CoelhoC	ITDI	0.4415
CoelhoC	ITDI-melatonin	0.5295
CoelhoC	lidocaine	0.766864
CoelhoC	lipoic acid + Vit	0.678159
CoelhoC	melatonin	0.437545
CoelhoC	misprost	0.56225
CoelhoC	neramexane	0.403341
CoelhoC	Neurotec	0.672705
CoelhoC	NOR-TOP	0.504136
CoelhoC	nortriptyline	0.581909
CoelhoC	oligonol	0.202136
CoelhoC	ondansetron	0.341432
CoelhoC	oxcarbazepine	0.552091
CoelhoC	paroxetine	0.392227
CoelhoC	pentoxifylline	0.756136
CoelhoC	piribedil	0.677455
CoelhoC	placebo	0.287864
CoelhoC	pramipexole	0.633636
CoelhoC	sertraline	0.347318
CoelhoC	sulodexide	0.516886
CoelhoC	trazodone	0.2745
CoelhoC	vardenafil	0.196091
CoelhoC	VER-PAR	0.504091
CoelhoC	VES-PAR	0.326955
CoelhoC	vestipitant	0.305227
CoelhoC	VitB12	0.282864
CoelhoC	zinc	0.715773
AbbasiR	acamprosate	0.705047
AbbasiR	ALP-ITDI-LPE	0.55007
AbbasiR	alprazolam	0.489442
AbbasiR	alprazolam-ITDI	0.220116
AbbasiR	amitriptyline	0.755628
AbbasiR	betahistine	0.408279
AbbasiR	carbamazepine	0.476326
AbbasiR	caroverine	0.940953
AbbasiR	cilostazol	0.0567907
AbbasiR	clonazepam	0.604698
AbbasiR	CoQ10	NA
AbbasiR	deanxit-clonazepam	0.668581
AbbasiR	EHLP	0.25893
AbbasiR	gabapentin	0.377953
AbbasiR	gabapentin-lidocaine	0.742326
AbbasiR	GB	0.742256
AbbasiR	GB-Vit	0.997698
AbbasiR	hangekobokuto	0.255465
AbbasiR	ITDI	0.443651
AbbasiR	ITDI-melatonin	0.534651
AbbasiR	lidocaine	0.760628
AbbasiR	lipoic acid + Vit	0.678953
AbbasiR	melatonin	0.443884
AbbasiR	misprost	0.554256
AbbasiR	neramexane	0.418558
AbbasiR	Neurotec	0.672233
AbbasiR	NOR-TOP	0.505512
AbbasiR	nortriptyline	0.569977
AbbasiR	oligonol	0.210372
AbbasiR	ondansetron	0.355047
AbbasiR	oxcarbazepine	0.560884
AbbasiR	paroxetine	0.395465
AbbasiR	pentoxifylline	0.764558
AbbasiR	piribedil	0.668093
AbbasiR	placebo	0.290628
AbbasiR	pramipexole	0.62586
AbbasiR	sertraline	0.374814
AbbasiR	sulodexide	0.505651
AbbasiR	trazodone	0.287
AbbasiR	vardenafil	0.180907
AbbasiR	VER-PAR	0.524581
AbbasiR	VES-PAR	0.32493
AbbasiR	vestipitant	0.317093
AbbasiR	VitB12	0.301186
AbbasiR	zinc	0.48007
RosenbergS	acamprosate	0.68
RosenbergS	ALP-ITDI-LPE	0.544091
RosenbergS	alprazolam	0.491773
RosenbergS	alprazolam-ITDI	0.215773
RosenbergS	amitriptyline	0.749932
RosenbergS	betahistine	0.414773
RosenbergS	carbamazepine	0.450977
RosenbergS	caroverine	0.937614
RosenbergS	cilostazol	0.0635682
RosenbergS	clonazepam	0.578818
RosenbergS	CoQ10	0.337318
RosenbergS	deanxit-clonazepam	0.670659
RosenbergS	EHLP	0.252364
RosenbergS	gabapentin	0.376159
RosenbergS	gabapentin-lidocaine	0.738364
RosenbergS	GB	0.738636
RosenbergS	GB-Vit	0.996545
RosenbergS	hangekobokuto	0.259818
RosenbergS	ITDI	0.443977
RosenbergS	ITDI-melatonin	0.654682
RosenbergS	lidocaine	0.748068
RosenbergS	lipoic acid + Vit	0.672636
RosenbergS	melatonin	0.609023
RosenbergS	misprost	0.565295
RosenbergS	neramexane	0.416682
RosenbergS	Neurotec	0.659523
RosenbergS	NOR-TOP	0.491932
RosenbergS	nortriptyline	0.582068
RosenbergS	oligonol	0.203136
RosenbergS	ondansetron	0.360955
RosenbergS	oxcarbazepine	0.537795
RosenbergS	paroxetine	0.3935
RosenbergS	pentoxifylline	0.730591
RosenbergS	piribedil	0.656614
RosenbergS	placebo	0.295114
RosenbergS	pramipexole	0.6185
RosenbergS	sertraline	0.472
RosenbergS	sulodexide	0.490591
RosenbergS	trazodone	0.292909
RosenbergS	vardenafil	0.187591
RosenbergS	VER-PAR	0.507818
RosenbergS	VES-PAR	0.3295
RosenbergS	vestipitant	0.309864
RosenbergS	VitB12	0.30325
RosenbergS	zinc	0.469205
HartighJ	acamprosate	0.705465
HartighJ	ALP-ITDI-LPE	0.563209
HartighJ	alprazolam	0.503767
HartighJ	alprazolam-ITDI	0.216907
HartighJ	amitriptyline	0.760651
HartighJ	betahistine	0.429767
HartighJ	carbamazepine	0.492233
HartighJ	caroverine	0.945744
HartighJ	cilostazol	0.0525814
HartighJ	clonazepam	0.625349
HartighJ	CoQ10	0.371558
HartighJ	deanxit-clonazepam	0.665279
HartighJ	EHLP	0.264535
HartighJ	gabapentin	0.389512
HartighJ	gabapentin-lidocaine	0.76214
HartighJ	GB	0.76014
HartighJ	GB-Vit	0.997628
HartighJ	hangekobokuto	0.267814
HartighJ	ITDI	0.469395
HartighJ	ITDI-melatonin	0.537302
HartighJ	lidocaine	NA
HartighJ	lipoic acid + Vit	0.694698
HartighJ	melatonin	0.460884
HartighJ	misprost	0.584884
HartighJ	neramexane	0.428791
HartighJ	Neurotec	0.670744
HartighJ	NOR-TOP	0.52507
HartighJ	nortriptyline	0.586116
HartighJ	oligonol	0.204721
HartighJ	ondansetron	0.357907
HartighJ	oxcarbazepine	0.556163
HartighJ	paroxetine	0.396419
HartighJ	pentoxifylline	0.776395
HartighJ	piribedil	0.695977
HartighJ	placebo	0.304256
HartighJ	pramipexole	0.658372
HartighJ	sertraline	0.374907
HartighJ	sulodexide	0.528279
HartighJ	trazodone	0.287395
HartighJ	vardenafil	0.188326
HartighJ	VER-PAR	0.51614
HartighJ	VES-PAR	0.331814
HartighJ	vestipitant	0.307326
HartighJ	VitB12	0.302721
HartighJ	zinc	0.480721
SullivanM	acamprosate	0.706767
SullivanM	ALP-ITDI-LPE	0.570372
SullivanM	alprazolam	0.491767
SullivanM	alprazolam-ITDI	0.215233
SullivanM	amitriptyline	0.758279
SullivanM	betahistine	0.421116
SullivanM	carbamazepine	0.492512
SullivanM	caroverine	0.945442
SullivanM	cilostazol	0.0480233
SullivanM	clonazepam	0.613093
SullivanM	CoQ10	0.350907
SullivanM	deanxit-clonazepam	0.670744
SullivanM	EHLP	0.260233
SullivanM	gabapentin	0.38814
SullivanM	gabapentin-lidocaine	0.753651
SullivanM	GB	0.753721
SullivanM	GB-Vit	0.997535
SullivanM	hangekobokuto	0.258442
SullivanM	ITDI	0.449047
SullivanM	ITDI-melatonin	0.534837
SullivanM	lidocaine	0.769
SullivanM	lipoic acid + Vit	0.688814
SullivanM	melatonin	0.460907
SullivanM	misprost	0.572163
SullivanM	neramexane	0.41807
SullivanM	Neurotec	0.667581
SullivanM	NOR-TOP	0.516698
SullivanM	nortriptyline	NA
SullivanM	oligonol	0.212977
SullivanM	ondansetron	0.357419
SullivanM	oxcarbazepine	0.571279
SullivanM	paroxetine	0.398791
SullivanM	pentoxifylline	0.747581
SullivanM	piribedil	0.67414
SullivanM	placebo	0.303186
SullivanM	pramipexole	0.641791
SullivanM	sertraline	0.372535
SullivanM	sulodexide	0.512372
SullivanM	trazodone	0.28107
SullivanM	vardenafil	0.199884
SullivanM	VER-PAR	0.517977
SullivanM	VES-PAR	0.331814
SullivanM	vestipitant	0.312186
SullivanM	VitB12	0.31314
SullivanM	zinc	0.478767
AbtahiS	acamprosate	0.68925
AbtahiS	ALP-ITDI-LPE	0.586023
AbtahiS	alprazolam	0.493932
AbtahiS	alprazolam-ITDI	0.204205
AbtahiS	amitriptyline	0.755477
AbtahiS	betahistine	0.424886
AbtahiS	carbamazepine	0.488773
AbtahiS	caroverine	0.937523
AbtahiS	cilostazol	0.0630227
AbtahiS	clonazepam	0.613864
AbtahiS	CoQ10	0.358341
AbtahiS	deanxit-clonazepam	0.674114
AbtahiS	EHLP	0.255182
AbtahiS	gabapentin	0.38975
AbtahiS	gabapentin-lidocaine	0.749386
AbtahiS	GB	0.743523
AbtahiS	GB-Vit	0.997636
AbtahiS	hangekobokuto	0.276341
AbtahiS	ITDI	0.464727
AbtahiS	ITDI-melatonin	0.429773
AbtahiS	lidocaine	0.755045
AbtahiS	lipoic acid + Vit	0.67675
AbtahiS	melatonin	0.3445
AbtahiS	misprost	0.578409
AbtahiS	neramexane	0.424136
AbtahiS	Neurotec	0.672295
AbtahiS	NOR-TOP	0.501591
AbtahiS	nortriptyline	0.578795
AbtahiS	oligonol	0.210977
AbtahiS	ondansetron	0.359023
AbtahiS	oxcarbazepine	0.564909
AbtahiS	paroxetine	0.395409
AbtahiS	pentoxifylline	0.74725
AbtahiS	piribedil	0.666886
AbtahiS	placebo	0.300182
AbtahiS	pramipexole	0.653
AbtahiS	sertraline	0.475886
AbtahiS	sulodexide	0.516182
AbtahiS	trazodone	0.296705
AbtahiS	vardenafil	0.195114
AbtahiS	VER-PAR	0.519114
AbtahiS	VES-PAR	0.346568
AbtahiS	vestipitant	0.324091
AbtahiS	VitB12	0.320705
AbtahiS	zinc	0.48075
AlbuS	acamprosate	0.697651
AlbuS	ALP-ITDI-LPE	0.56614
AlbuS	alprazolam	0.489326
AlbuS	alprazolam-ITDI	0.206907
AlbuS	amitriptyline	0.761535
AlbuS	betahistine	0.434279
AlbuS	carbamazepine	0.454814
AlbuS	caroverine	0.940744
AlbuS	cilostazol	0.0531163
AlbuS	clonazepam	0.613465
AlbuS	CoQ10	0.35614
AlbuS	deanxit-clonazepam	0.66686
AlbuS	EHLP	0.254791
AlbuS	gabapentin	0.38607
AlbuS	gabapentin-lidocaine	0.760767
AlbuS	GB	0.758837
AlbuS	GB-Vit	0.997628
AlbuS	hangekobokuto	0.266698
AlbuS	ITDI	0.45207
AlbuS	ITDI-melatonin	NA
AlbuS	lidocaine	0.761419
AlbuS	lipoic acid + Vit	0.680512
AlbuS	melatonin	0.455605
AlbuS	misprost	0.572395
AlbuS	neramexane	0.424
AlbuS	Neurotec	0.677023
AlbuS	NOR-TOP	0.495302
AlbuS	nortriptyline	0.594535
AlbuS	oligonol	0.209302
AlbuS	ondansetron	0.35607
AlbuS	oxcarbazepine	0.548535
AlbuS	paroxetine	0.407837
AlbuS	pentoxifylline	0.759651
AlbuS	piribedil	0.667953
AlbuS	placebo	0.299279
AlbuS	pramipexole	0.635953
AlbuS	sertraline	0.374372
AlbuS	sulodexide	0.520535
AlbuS	trazodone	0.285907
AlbuS	vardenafil	0.193116
AlbuS	VER-PAR	0.519256
AlbuS	VES-PAR	0.33493
AlbuS	vestipitant	0.31686
AlbuS	VitB12	0.304791
AlbuS	zinc	0.487023
ZogerS	acamprosate	0.710477
ZogerS	ALP-ITDI-LPE	0.579432
ZogerS	alprazolam	0.510227
ZogerS	alprazolam-ITDI	0.217614
ZogerS	amitriptyline	0.762159
ZogerS	betahistine	0.443432
ZogerS	carbamazepine	0.495114
ZogerS	caroverine	0.943068
ZogerS	cilostazol	0.0578864
ZogerS	clonazepam	0.595455
ZogerS	CoQ10	0.368568
ZogerS	deanxit-clonazepam	0.676386
ZogerS	EHLP	0.271409
ZogerS	gabapentin	0.389318
ZogerS	gabapentin-lidocaine	0.749841
ZogerS	GB	0.747114
ZogerS	GB-Vit	0.997409
ZogerS	hangekobokuto	0.28125
ZogerS	ITDI	0.451386
ZogerS	ITDI-melatonin	0.448295
ZogerS	lidocaine	0.757045
ZogerS	lipoic acid + Vit	0.683977
ZogerS	melatonin	0.355114
ZogerS	misprost	0.578182
ZogerS	neramexane	0.429545
ZogerS	Neurotec	0.675545
ZogerS	NOR-TOP	0.496932
ZogerS	nortriptyline	0.585773
ZogerS	oligonol	0.238023
ZogerS	ondansetron	0.369795
ZogerS	oxcarbazepine	0.5675
ZogerS	paroxetine	0.403182
ZogerS	pentoxifylline	0.758364
ZogerS	piribedil	0.665386
ZogerS	placebo	0.313659
ZogerS	pramipexole	0.620227
ZogerS	sertraline	0.253523
ZogerS	sulodexide	0.518091
ZogerS	trazodone	0.301318
ZogerS	vardenafil	0.213977
ZogerS	VER-PAR	0.511523
ZogerS	VES-PAR	0.344091
ZogerS	vestipitant	0.342773
ZogerS	VitB12	0.336955
ZogerS	zinc	0.483659
MeeusO	acamprosate	0.703791
MeeusO	ALP-ITDI-LPE	0.56586
MeeusO	alprazolam	0.496233
MeeusO	alprazolam-ITDI	0.221372
MeeusO	amitriptyline	0.766465
MeeusO	betahistine	0.422233
MeeusO	carbamazepine	0.472209
MeeusO	caroverine	0.947
MeeusO	cilostazol	0.0534651
MeeusO	clonazepam	0.61107
MeeusO	CoQ10	0.359116
MeeusO	deanxit-clonazepam	NA
MeeusO	EHLP	0.26393
MeeusO	gabapentin	0.371349
MeeusO	gabapentin-lidocaine	0.750651
MeeusO	GB	0.752791
MeeusO	GB-Vit	0.997674
MeeusO	hangekobokuto	0.255302
MeeusO	ITDI	0.459372
MeeusO	ITDI-melatonin	0.535651
MeeusO	lidocaine	0.771558
MeeusO	lipoic acid + Vit	0.689977
MeeusO	melatonin	0.457721
MeeusO	misprost	0.584326
MeeusO	neramexane	0.425442
MeeusO	Neurotec	0.672581
MeeusO	NOR-TOP	0.49907
MeeusO	nortriptyline	0.59286
MeeusO	oligonol	0.215953
MeeusO	ondansetron	0.361326
MeeusO	oxcarbazepine	0.574116
MeeusO	paroxetine	0.403256
MeeusO	pentoxifylline	0.759372
MeeusO	piribedil	0.679395
MeeusO	placebo	0.299372
MeeusO	pramipexole	0.648698
MeeusO	sertraline	0.377279
MeeusO	sulodexide	0.515233
MeeusO	trazodone	0.296419
MeeusO	vardenafil	0.179744
MeeusO	VER-PAR	0.533047
MeeusO	VES-PAR	0.347698
MeeusO	vestipitant	0.318163
MeeusO	VitB12	0.30107
MeeusO	zinc	0.490791
ProchazkovaK	acamprosate	0.699302
ProchazkovaK	ALP-ITDI-LPE	0.573814
ProchazkovaK	alprazolam	0.505395
ProchazkovaK	alprazolam-ITDI	0.219907
ProchazkovaK	amitriptyline	0.769395
ProchazkovaK	betahistine	0.432023
ProchazkovaK	carbamazepine	0.467698
ProchazkovaK	caroverine	0.94607
ProchazkovaK	cilostazol	0.0577907
ProchazkovaK	clonazepam	0.618767
ProchazkovaK	CoQ10	0.348372
ProchazkovaK	deanxit-clonazepam	0.686442
ProchazkovaK	EHLP	0.263791
ProchazkovaK	gabapentin	0.382767
ProchazkovaK	gabapentin-lidocaine	0.749767
ProchazkovaK	GB	0.759721
ProchazkovaK	GB-Vit	0.997535
ProchazkovaK	hangekobokuto	0.259581
ProchazkovaK	ITDI	0.456744
ProchazkovaK	ITDI-melatonin	0.541581
ProchazkovaK	lidocaine	0.766535
ProchazkovaK	lipoic acid + Vit	0.692349
ProchazkovaK	melatonin	0.456977
ProchazkovaK	misprost	0.580698
ProchazkovaK	neramexane	0.429023
ProchazkovaK	Neurotec	0.675395
ProchazkovaK	NOR-TOP	0.518
ProchazkovaK	nortriptyline	0.601209
ProchazkovaK	oligonol	0.211488
ProchazkovaK	ondansetron	0.374465
ProchazkovaK	oxcarbazepine	0.562791
ProchazkovaK	paroxetine	0.403767
ProchazkovaK	pentoxifylline	NA
ProchazkovaK	piribedil	0.679372
ProchazkovaK	placebo	0.302674
ProchazkovaK	pramipexole	0.640581
ProchazkovaK	sertraline	0.377465
ProchazkovaK	sulodexide	0.533256
ProchazkovaK	trazodone	0.291349
ProchazkovaK	vardenafil	0.196302
ProchazkovaK	VER-PAR	0.529349
ProchazkovaK	VES-PAR	0.335605
ProchazkovaK	vestipitant	0.318
ProchazkovaK	VitB12	0.307349
ProchazkovaK	zinc	0.479535
AbouzariM	acamprosate	0.692048
AbouzariM	ALP-ITDI-LPE	0.560929
AbouzariM	alprazolam	0.494714
AbouzariM	alprazolam-ITDI	0.2065
AbouzariM	amitriptyline	0.77019
AbouzariM	betahistine	0.428429
AbouzariM	carbamazepine	0.474095
AbouzariM	caroverine	0.943619
AbouzariM	cilostazol	0.0565238
AbouzariM	clonazepam	0.611976
AbouzariM	CoQ10	0.367714
AbouzariM	deanxit-clonazepam	0.679762
AbouzariM	EHLP	0.258548
AbouzariM	gabapentin	0.381024
AbouzariM	gabapentin-lidocaine	0.746905
AbouzariM	GB	0.747143
AbouzariM	GB-Vit	0.99769
AbouzariM	hangekobokuto	0.263714
[truncated: 28 more rows]

[truncated: 5 more sheets: S.Table12, S.Table13, S.Table14, S.Table15, S.Table16]
