# Supplementary material
Source: HighWire-hosted journal article supplement (https://bmjopen.bmj.com/content/15/5/e096995)
Supplement: inline-supplementary-material-2 [file inline-supplementary-material-2.pdf]

Supplementary Figure 1

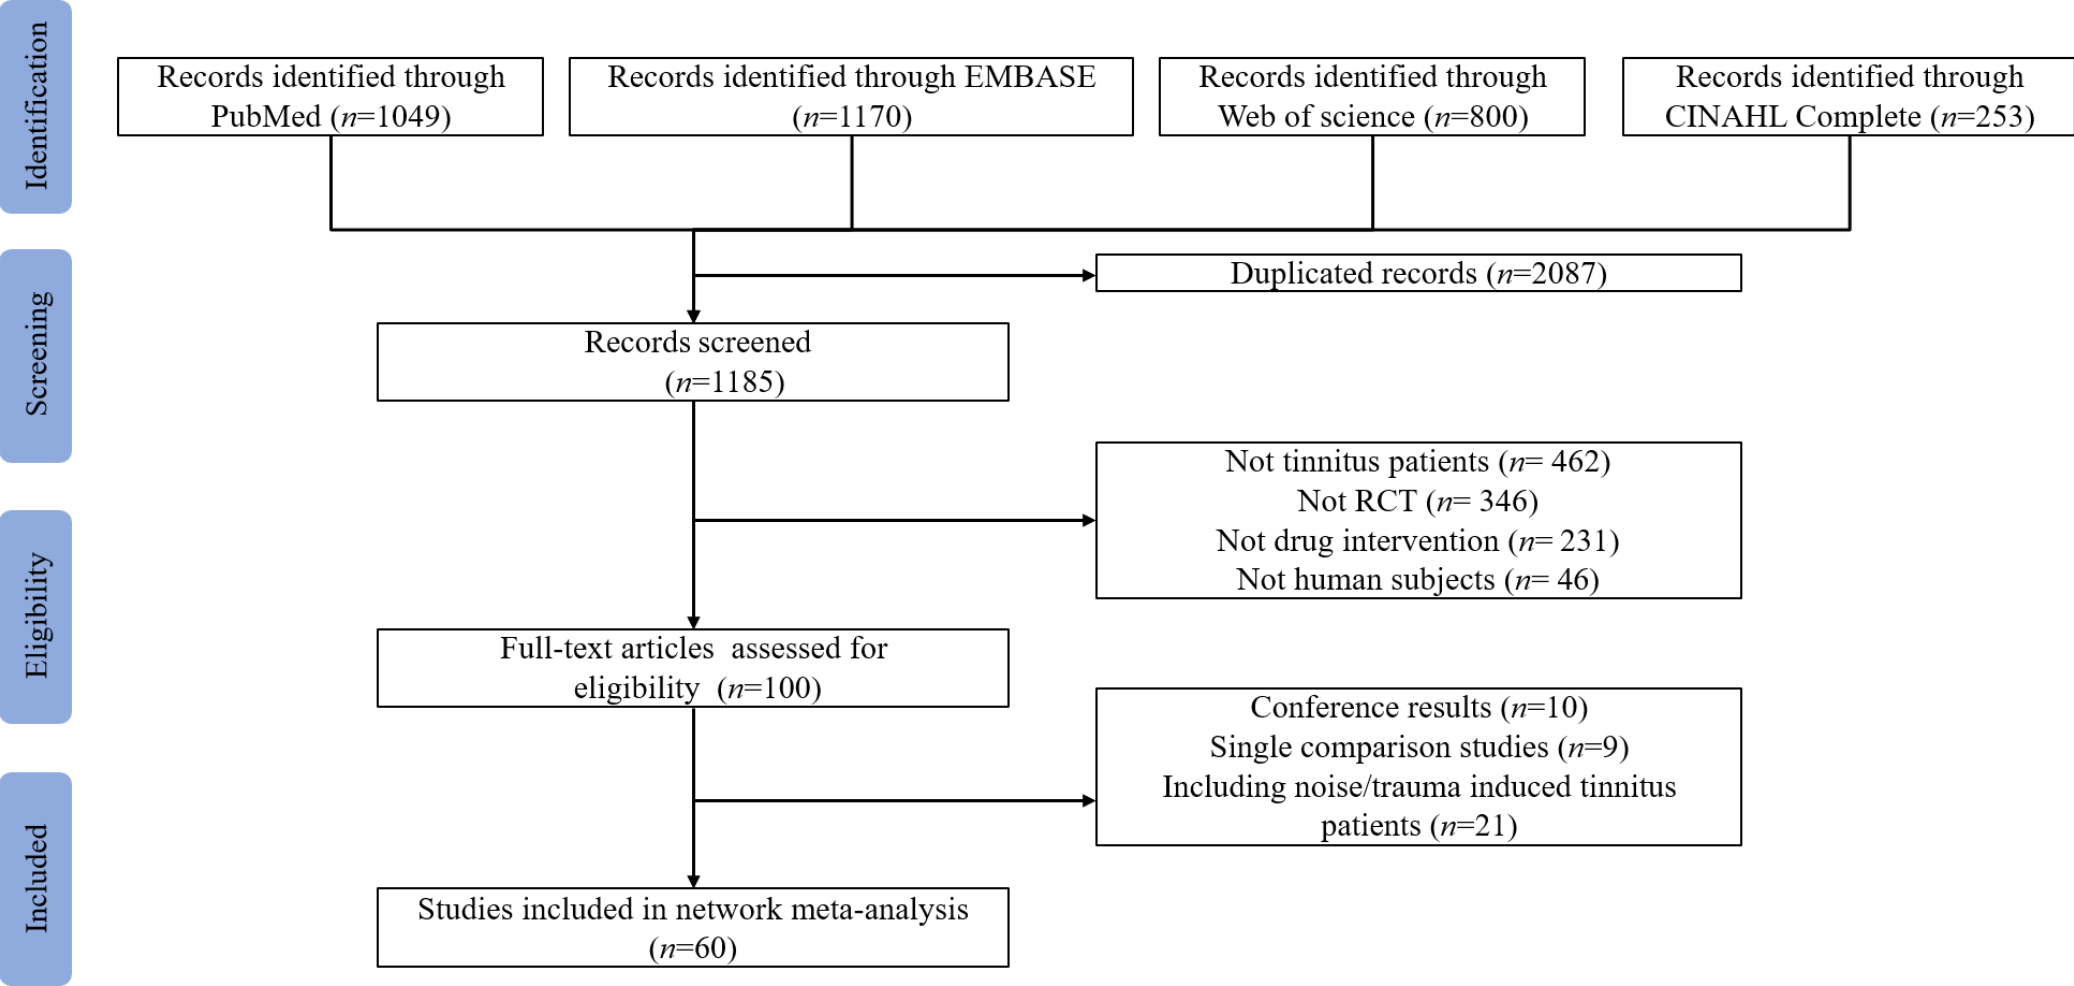

Supplementary Figure 1: Flowchart for searching and identifying eligible studies. RCT: randomized clinical trials.



Supplementary Figure 3

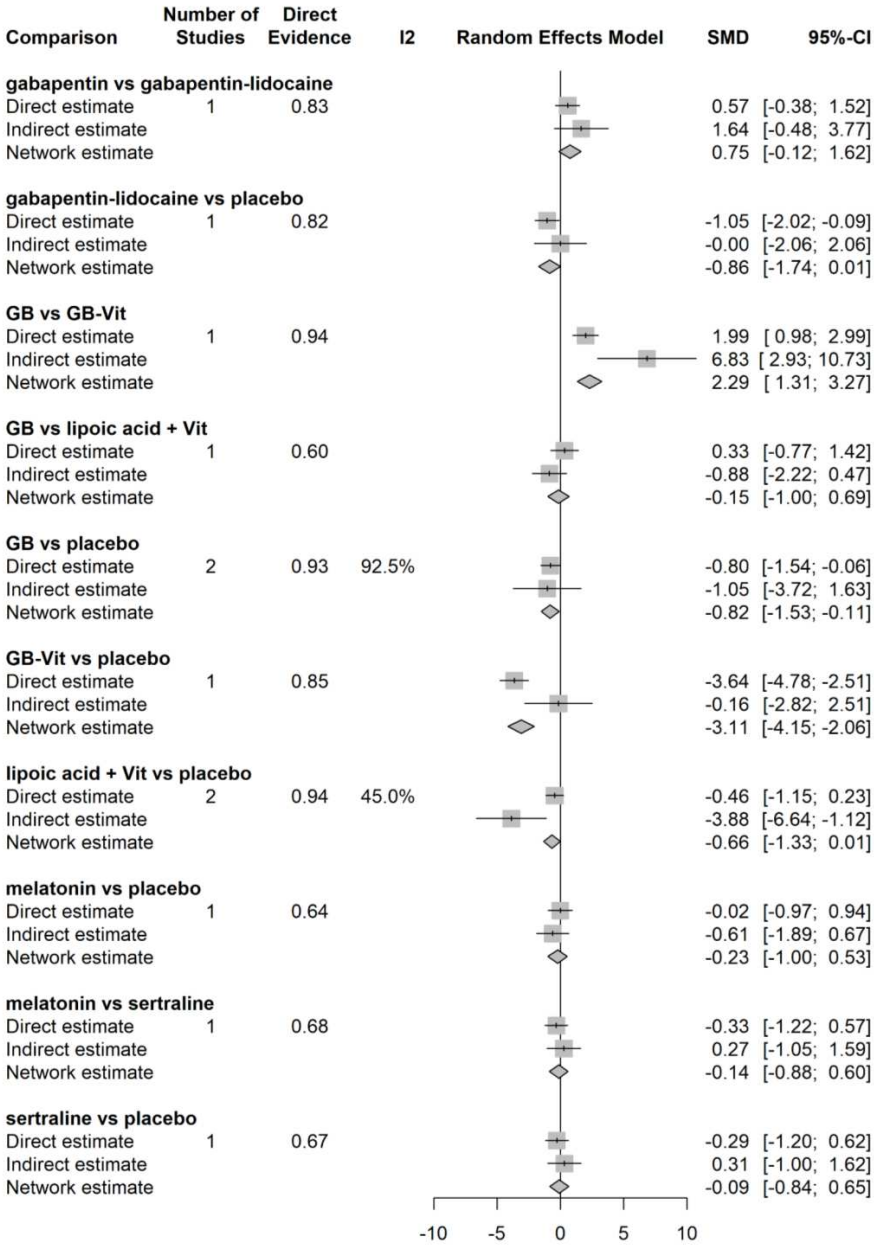

Supplementary Figure 3: Node-splitting analysis for comparisons with both direct and indirect evidence in the severity network analysis. GB: Ginkgo biloba; Vit: vitamin.

Supplementary Figure 4

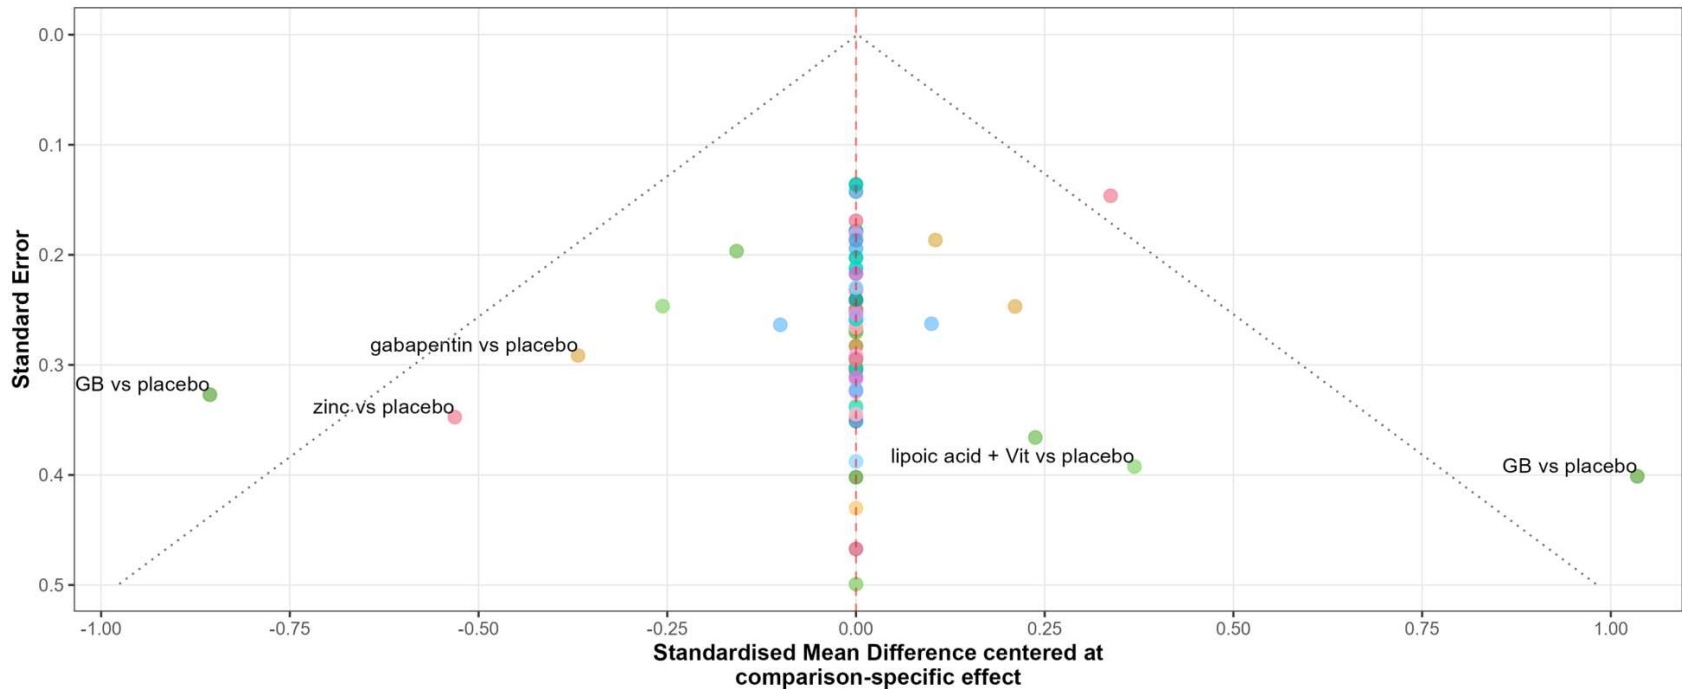

Supplementary Figure 4: Publication bias assessment using funnel plot in the severity network analysis. GB: Ginkgo biloba; Vit: vitamin; ALP-ITDI-LPE: alprazolam+intratympanic dexamethasone+lipo-prostaglandin E1; NOR-TOP: nortriptyline-topiramate; VER-PAR: verapamil-paroxetine; VES-PAR: vestipitant+paroxetine; EHLP: enzymolyzed honeybee larvae; CoQ10: coenzyme Q10.

|                                    |                                      |                                  |                            |                          |
|------------------------------------|--------------------------------------|----------------------------------|----------------------------|--------------------------|
| ● acamprosate vs placebo           | ● gabapentin-lidocaine vs gabapentin | ● lipoic acid + Vit vs placebo   | ● paroxetine vs placebo    | ● sulodexide vs placebo  |
| ● ALP-ITDI-LPE vs alprazolam       | ● gabapentin-lidocaine vs placebo    | ● melatonin vs placebo           | ● pentoxifylline vs GB     | ● VER-PAR vs NOR-TOP     |
| ● ALP-ITDI-LPE vs alprazolam-ITDI  | ● gabapentin vs placebo              | ● melatonin vs sertraline        | ● piribedil vs placebo     | ● VER-PAR vs placebo     |
| ● alprazolam vs alprazolam-ITDI    | ● GB-Vit vs GB                       | ● misprost vs placebo            | ● placebo vs cilostazol    | ● VES-PAR vs placebo     |
| ● alprazolam vs placebo            | ● GB-Vit vs placebo                  | ● neramexane vs placebo          | ● placebo vs EHLP          | ● VES-PAR vs vestipitant |
| ● amitriptyline vs placebo         | ● GB vs clonazepam                   | ● Neurotec vs placebo            | ● placebo vs hangekobokuto | ● vestipitant vs placebo |
| ● betahistine vs placebo           | ● GB vs lipoic acid + Vit            | ● NOR-TOP vs placebo             | ● placebo vs oligonol      | ● VitB12 vs placebo      |
| ● carbamazepine vs placebo         | ● GB vs placebo                      | ● nortriptyline vs placebo       | ● placebo vs trazodone     | ● zinc vs placebo        |
| ● caroverine vs betahistine        | ● ITDI-melatonin vs melatonin        | ● ondansetron vs placebo         | ● placebo vs vardenafil    |                          |
| ● CoQ10 vs placebo                 | ● ITDI vs placebo                    | ● oxcarbazepine vs carbamazepine | ● pramipexole vs placebo   |                          |
| ● deanxit-clonazepam vs clonazepam | ● lidocaine vs placebo               | ● oxcarbazepine vs placebo       | ● sertraline vs placebo    |                          |

Supplementary Figure 5

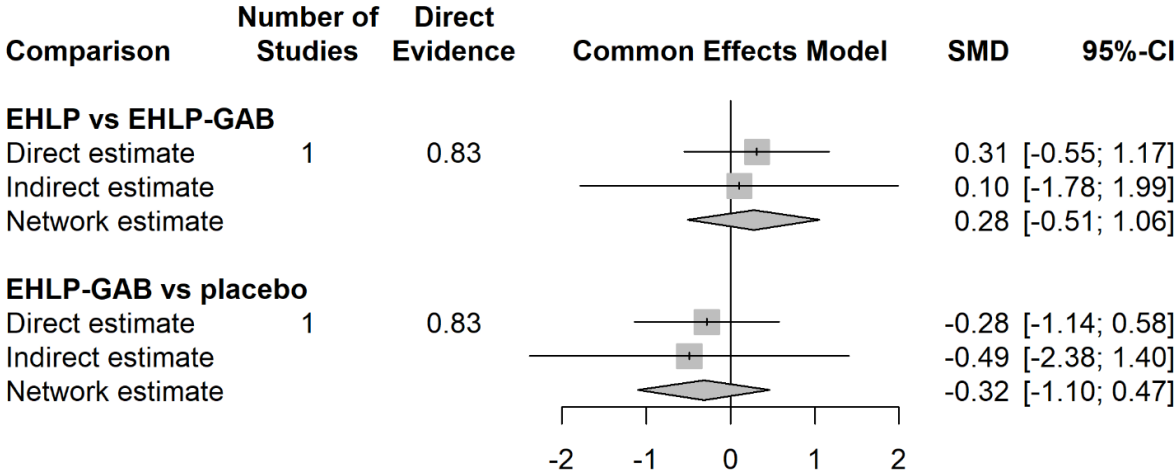

Supplementary Figure 5: Node-splitting analysis for comparisons with both direct and indirect evidence in the annoyance network analysis. EHLP: enzymolyzed honeybee larvae; GAB: gabapentin.

Supplementary Figure 6

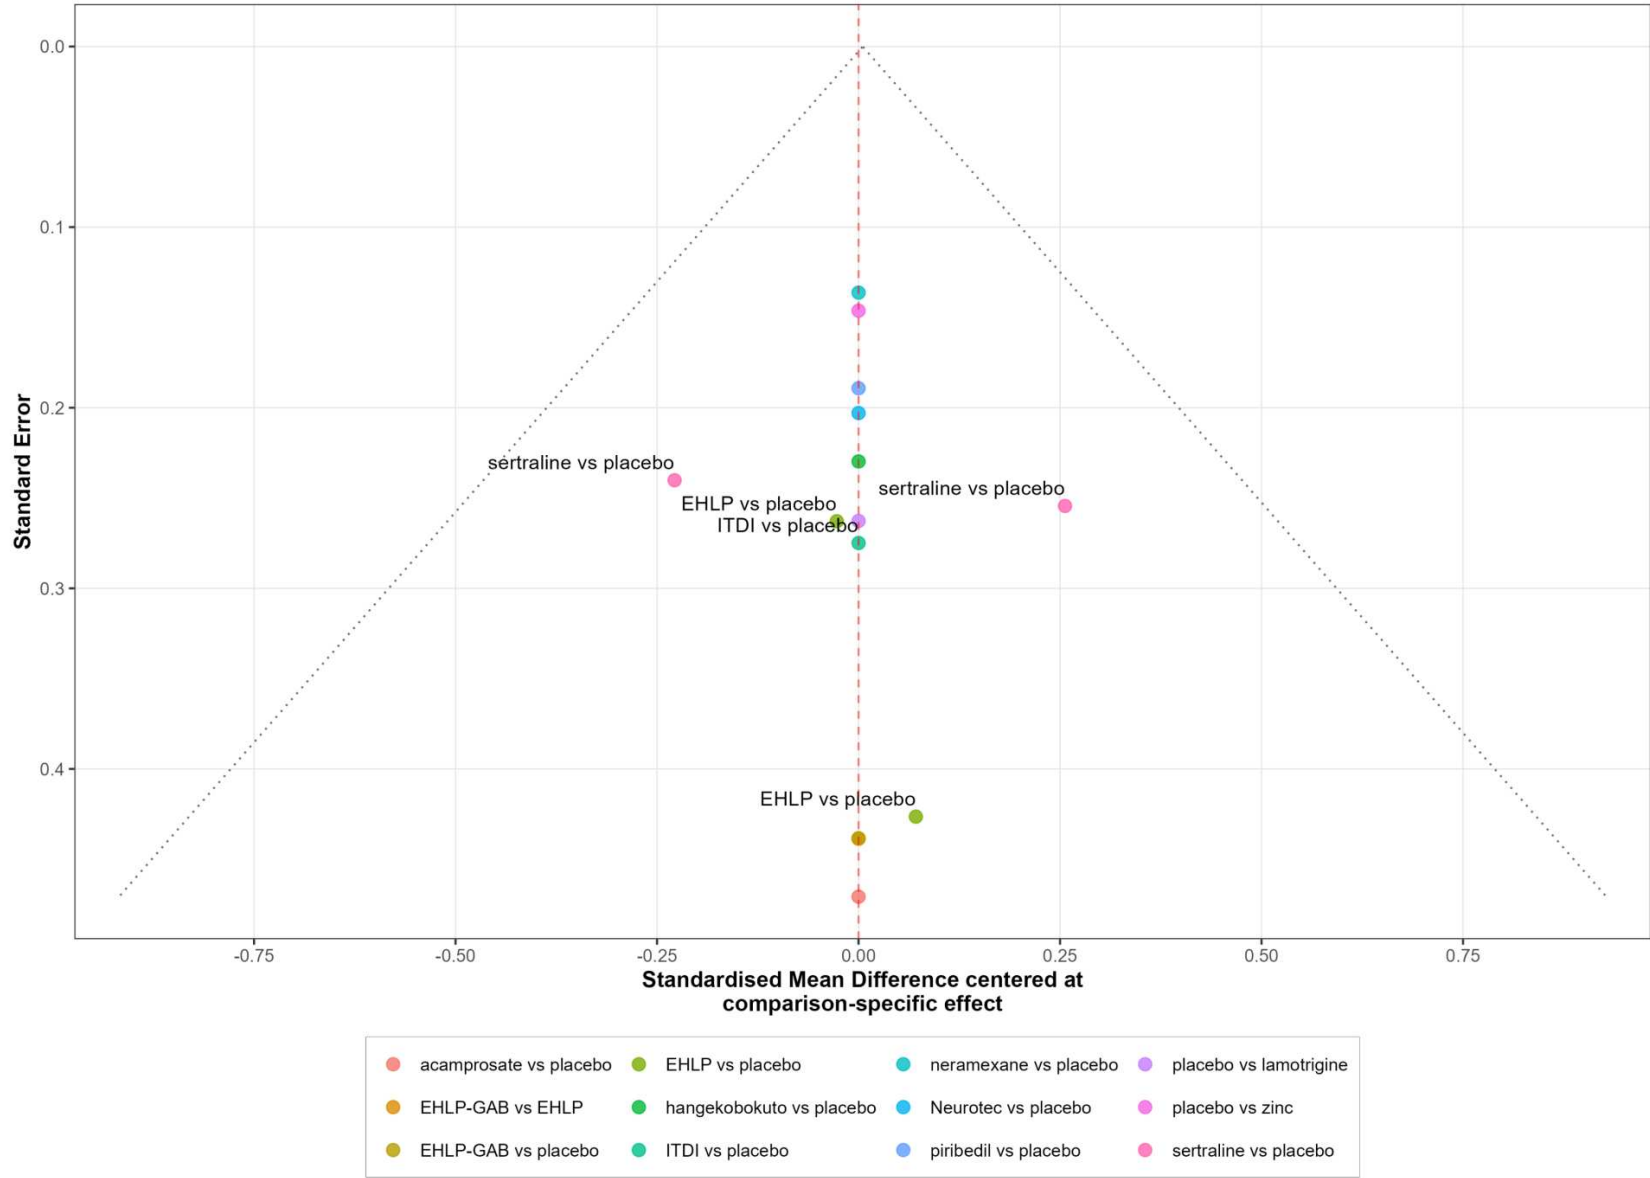

Supplementary Figure 6: Publication bias assessment using funnel plot in the annoyance network analysis. EHLP: enzymolyzed honeybee larvae; GAB: gabapentin.

Supplementary Figure 7

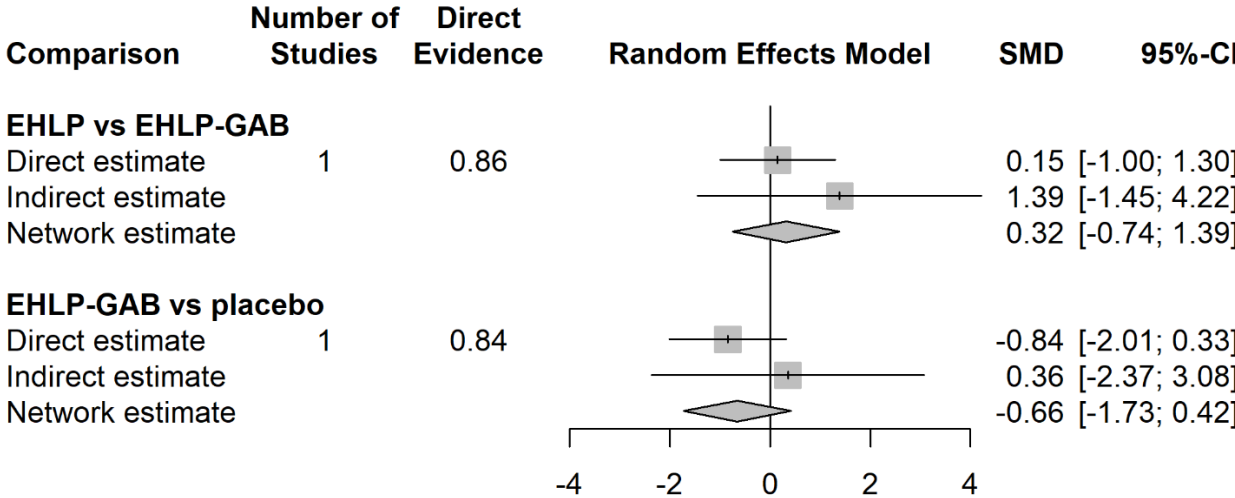

Supplementary Figure 7: Node-splitting analysis for comparisons with both direct and indirect evidence in the loudness network analysis, EHLP: enzymolyzed honeybee larvae; GAB: gabapentin.

Supplementary Figure 8

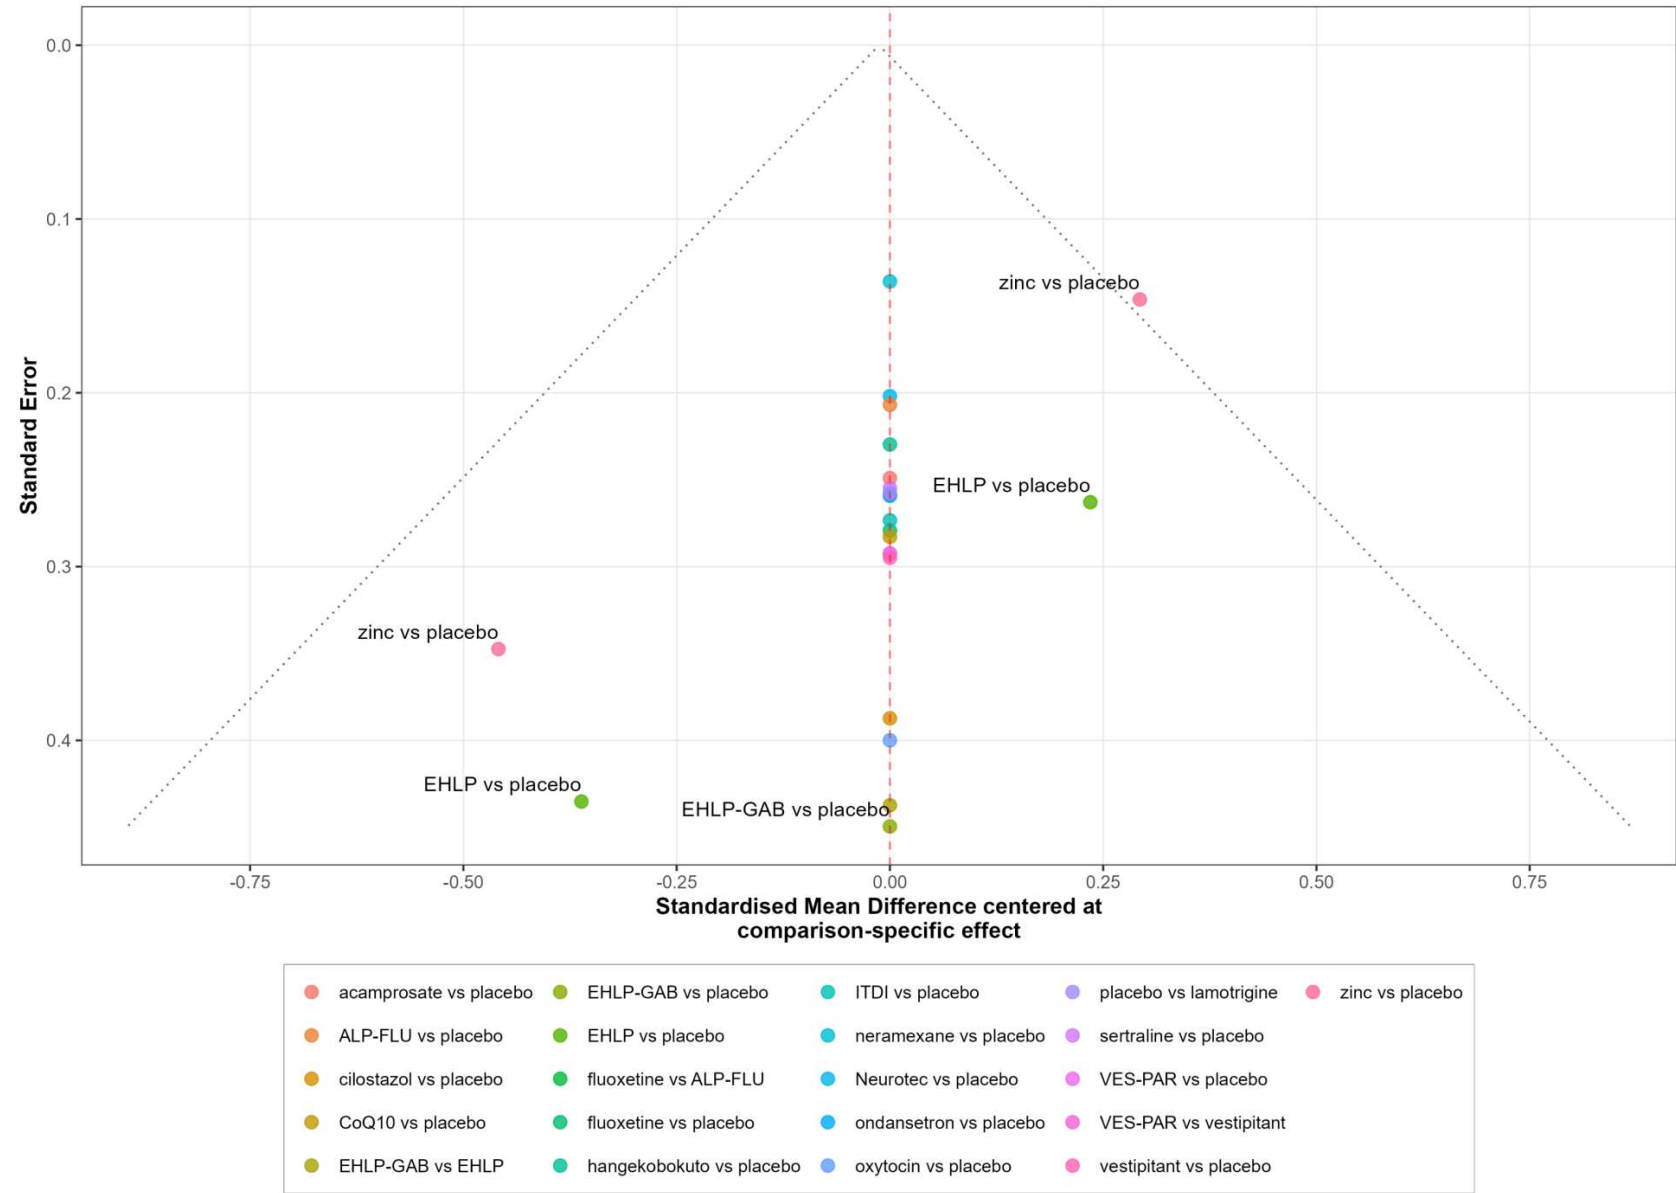

Supplementary Figure 8: Publication bias assessment using funnel plot in the loudness network analysis, ITDI: intratympanic dexamethasone; EHLP: enzymolyzed honeybee larvae; GAB: gabapentin; ALP-FLU: alprazolam+fluoxetine; VES-PAR: vestipitant+paroxetine.



Supplementary Figure 9

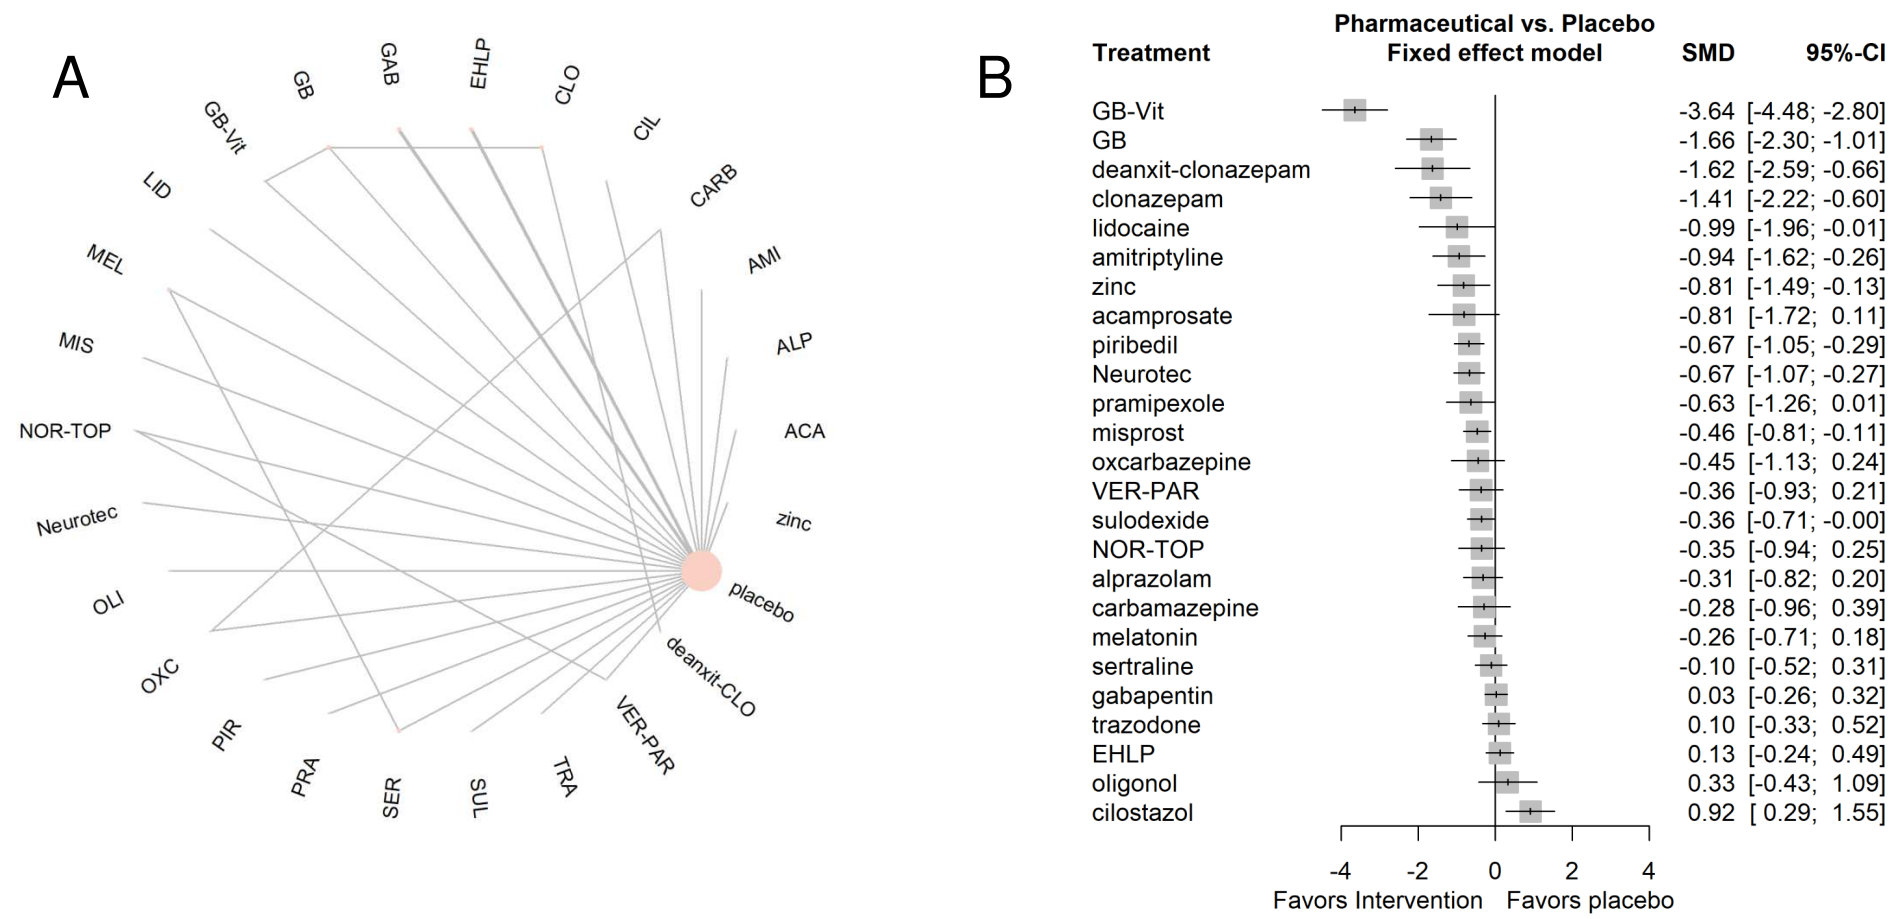

Supplementary Figure 9: A. Network structure of changes in severity of tinnitus with per protocol results. B. Forest plot of the changes in severity of tinnitus with per protocol results. The effect size less than zero indicates the treatment was associated with higher improvement in severity of tinnitus than the placebo. ALA: α-lipoic acid; ACA: acamprosate; ALP: alprazolam; AMI: amitriptyline; CARB: carbamazepine; CIL: cilostazol; CLO: clonazepam; EHLP: enzymolyzed honeybee larvae; GAB: gabapentin; LID: lidocaine; GB: ginkgo biloba; MEL: melatonin; MIS: misprost; NOR: nortriptyline; TOP: topiramate; OLI: oligonol; OXC: oxcarbazepine; PAR: paroxetine; PIR: piribedil; PRA: pramipexole; SER: sertraline; SUL: sulodexide; TRA: trazodone; VER: verapamil.

Supplementary Figure 10

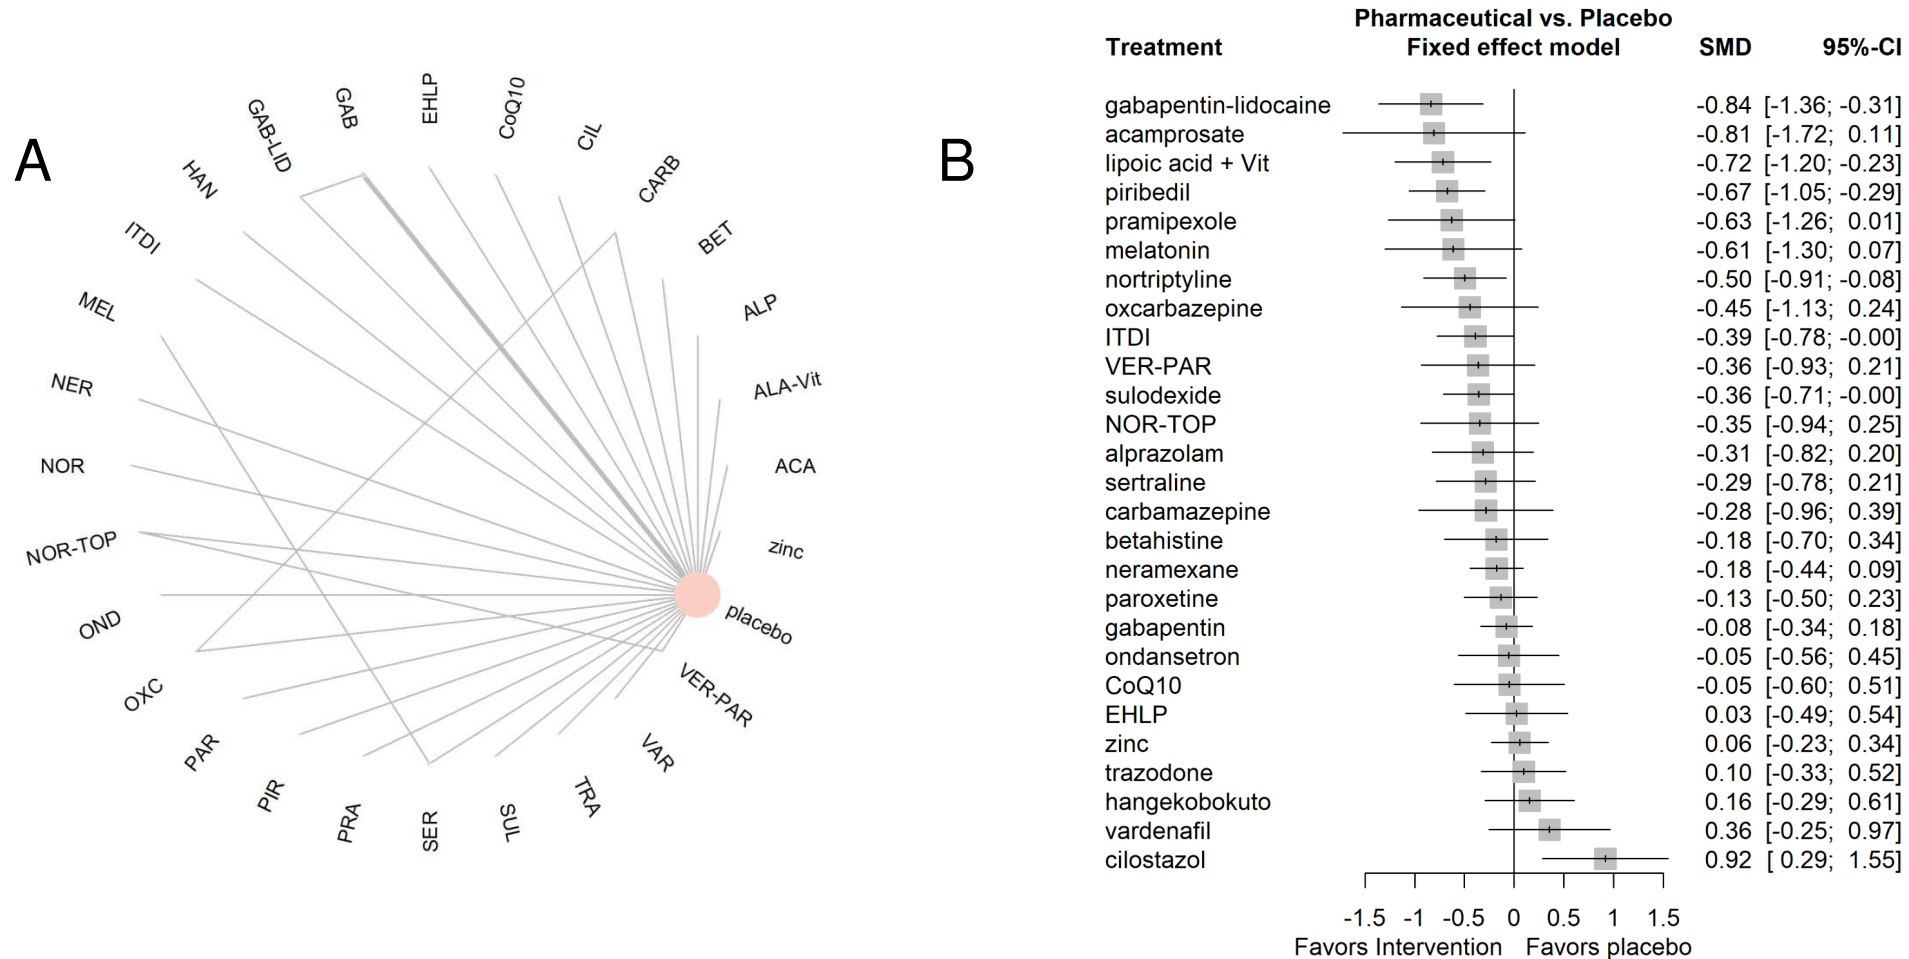

Supplementary Figure 10: A. Network structure of changes in severity of chronic tinnitus. B. Forest plot of the changes in severity of chronic tinnitus. The effect size less than zero indicates the treatment was associated with higher improvement in severity of tinnitus than the placebo. ALA: α-lipoic acid; ACA: acamprosate; ALP: alprazolam; Vit: vitamin; BET: betahistine; CARB: carbamazepine; CIL: cilostazol; CoQ10: coenzyme Q10; EHLP: enzymolyzed honeybee larvae; GAB: gabapentin; LID: lidocaine; HAN: hangekobokuto; ITDI: intratympanic dexamethasone injection; MEL: melatonin; NER: neramexane; NOR: nortriptyline; TOP: topiramate; OND: ondansetron; OXC: oxcarbazepine; PAR: paroxetine; PIR: piribedil; PRA: pramipexole; SER: sertraline; SUL: sulodexide; TRA: trazodone; VER: verapamil; VAR: vardenafil.

Supplementary Figure 11

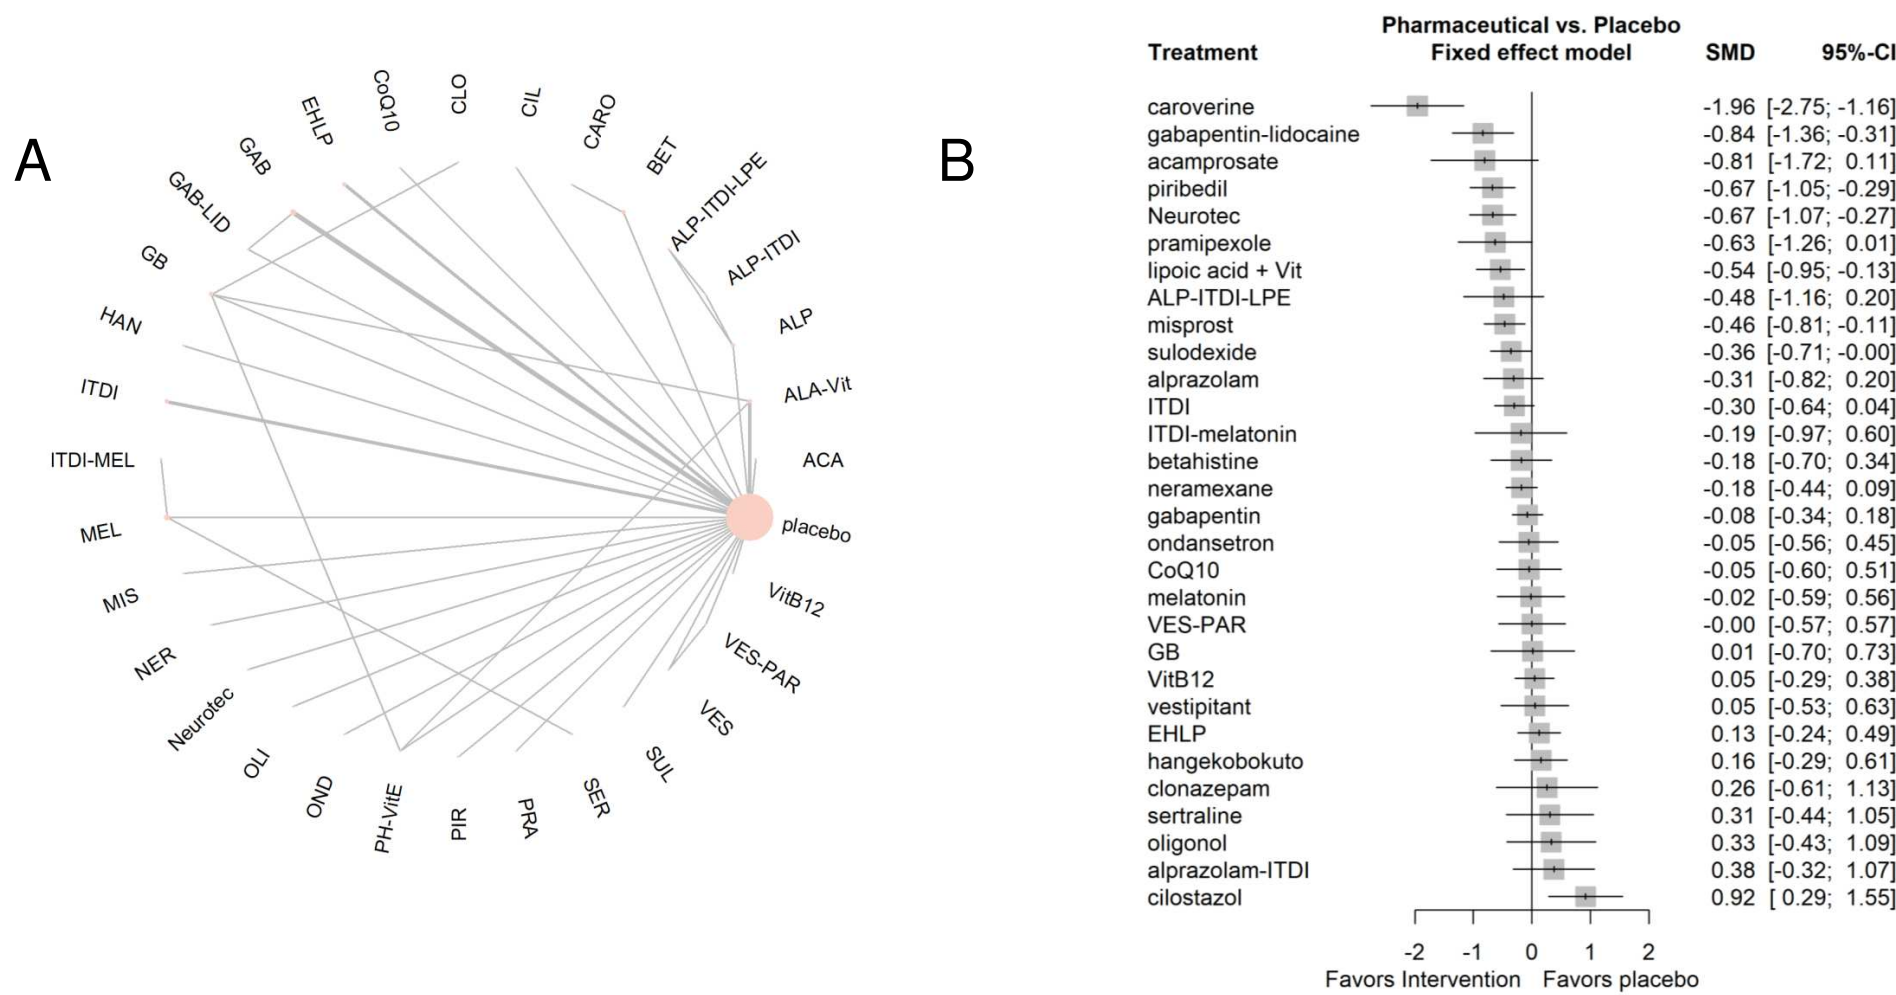

Supplementary Figure 11: A. Network structure of changes in severity of tinnitus using THI. B. Forest plot of the changes in severity of tinnitus using THI. The effect size less than zero indicates the treatment was associated with higher improvement in severity of tinnitus than the placebo. ALA:  $\alpha$ -lipoic acid; ACA: acamprosate; ALP: alprazolam; GB: Ginkgo biloba; Vit: vitamin; LPE: lipo-prostaglandin E1; ITDI: intratympanic dexamethasone injection; BET: betahistine; CARO: caroverine; CIL: cilostazol; CLO: clonazepam; CoQ10: coenzyme Q10; EHLP: enzymolyzed honeybee larvae; GAB: gabapentin; LID: lidocaine; HAN: hangekobokuto; MEL: melatonin; MIS: misprost; NER: neramexane; OLI: oligonol; OND: ondansetron; PAR: paroxetine; PH: papaverine hydrochloride; PIR: piribedil; PRA: pramipexole; SER: sertraline; SUL: sulodexide; VES: vestipitant; PAR: pramipexole.

Supplementary Figure 12

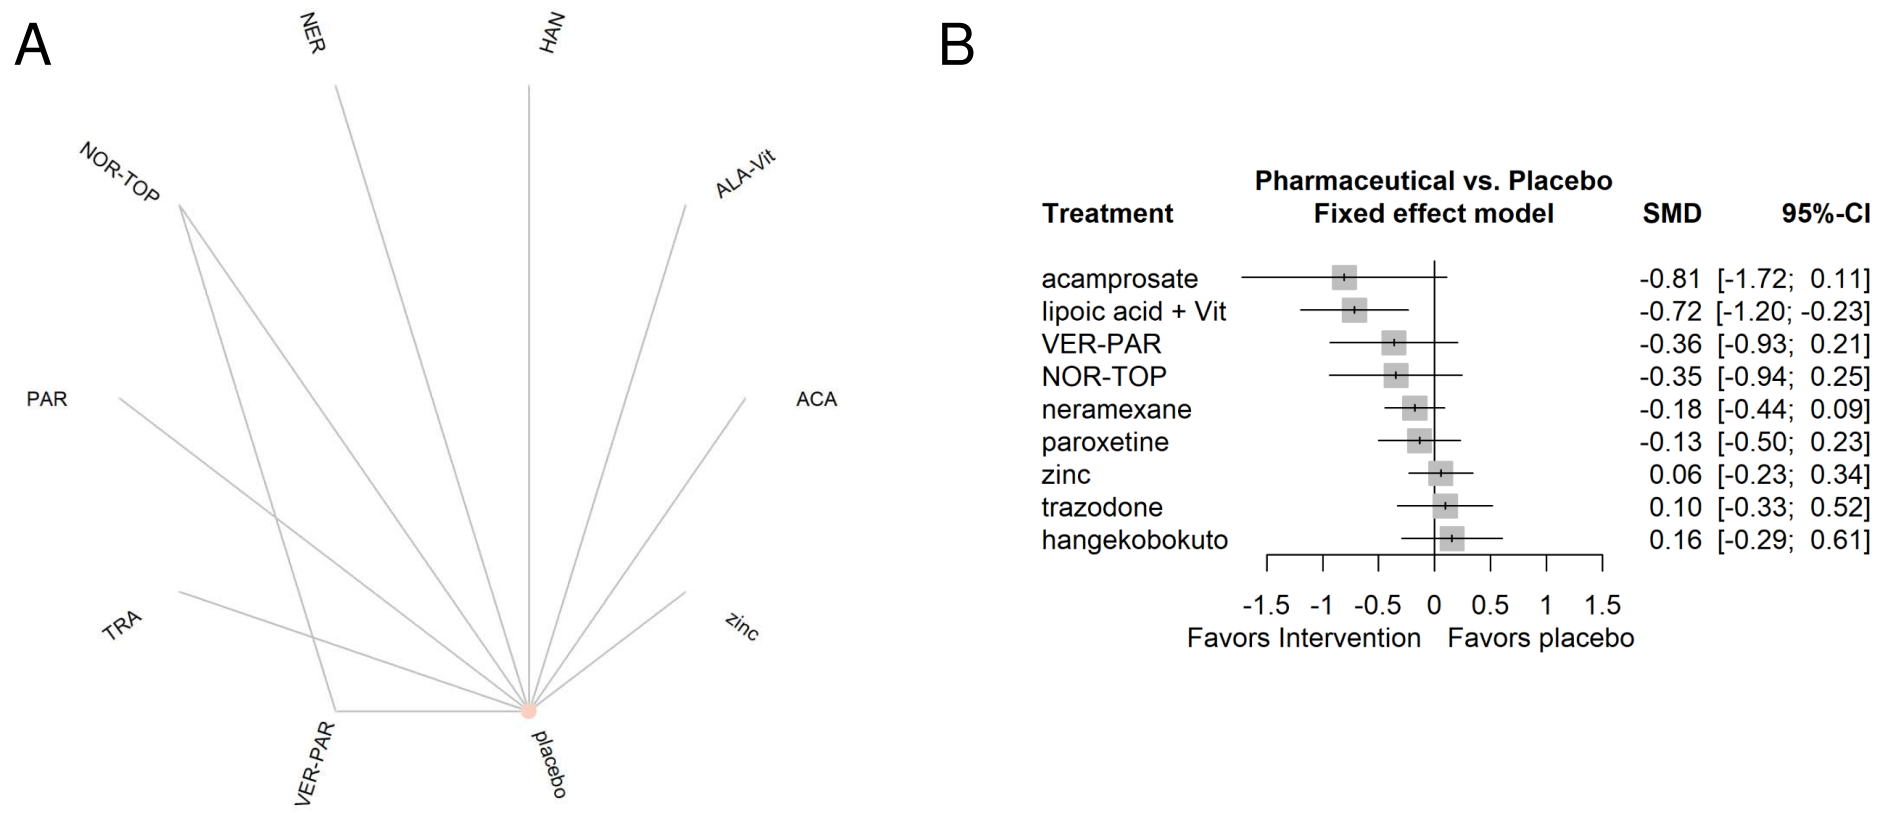

Supplementary Figure 12: A. Network structure of changes in severity of tinnitus of low risk of bias studies. B. Forest plot of the changes in severity of tinnitus of low risk of bias studies. The effect size less than zero indicates the treatment was associated with higher improvement in severity of tinnitus than the placebo. ALA: α-lipoic acid; ACA: acamprosate; HAN: hangekobokuto; NER: neramexane; NOR: nortriptyline; TOP: topiramate; PAR: paroxetine; TRA: trazodone; VER: verapamil.
